# Supplementary material
Source: PubMed Central journal article supplement (PMC10214386)
Supplement: NIHMS1890223-supplement-Sup1.pdf [file NIHMS1890223-supplement-Sup1.pdf]

| Gene model | Gene name           | baseMean   | log2FoldChange | lfcSE      | stat       |
|------------|---------------------|------------|----------------|------------|------------|
| KH.S563.4  | HMX3_HMX2_HMX1      | 1497.58014 | 7.788203187    | 0.71982141 | 10.8196325 |
| KH.C12.452 |                     | 278.960618 | 3.943945434    | 0.26693552 | 14.7748991 |
| KH.L141.43 | S35G2               | 356.153709 | 3.345641248    | 0.17972257 | 18.6155875 |
| KH.C2.1118 | CUBN_TLL2_TLL1      | 22.6714178 | 3.313027981    | 0.65431869 | 5.06332473 |
| KH.C7.773  | ZNT10_ZNT5_ZNT7     | 80.3558844 | 3.091644457    | 0.35791512 | 8.6379264  |
| KH.C9.599  |                     | 12.3528818 | 2.858415875    | 0.92523168 | 3.08940553 |
| KH.C13.177 | B4GT1_B4GT2_B4GT4   | 9.18552931 | 2.766048543    | 0.99890334 | 2.7690853  |
| KH.C1.1157 | KCND2_KCND3_KCND1   | 541.705822 | 2.681981421    | 0.13868948 | 19.3380306 |
| KH.L24.10  | COE3_COE1_COE2      | 654.626287 | 2.672948063    | 0.13799119 | 19.3704251 |
| KH.C10.175 |                     | 130.795701 | 2.341633022    | 0.31272683 | 7.48779052 |
| KH.C4.649  |                     | 114.276442 | 2.279563102    | 0.32395462 | 7.03667412 |
| KH.L112.16 |                     | 378.54048  | 2.27821521     | 0.18411362 | 12.3739635 |
| KH.C4.115  |                     | 616.188715 | 2.273959241    | 0.12804796 | 17.7586527 |
| KH.C6.129  | NGN1_NGN3_NGN2      | 1150.90216 | 2.271803413    | 0.37510494 | 6.05644756 |
| KH.C14.402 |                     | 14.5212124 | 2.221462456    | 0.78542936 | 2.82834149 |
| KH.S575.2  |                     | 77.8054741 | 2.180612194    | 0.31846669 | 6.84722216 |
| KH.C1.1282 |                     | 24.8274358 | 2.179897878    | 0.55365845 | 3.93726108 |
| KH.C12.154 |                     | 82.1301717 | 2.173151814    | 0.34881948 | 6.23001849 |
| KH.C3.499  |                     | 102.401309 | 2.070711555    | 0.29281466 | 7.07174823 |
| KH.C2.42   | PO4F3_PO4F2_PO4F1   | 524.692725 | 2.052100592    | 0.13318432 | 15.4079749 |
| KH.L128.2  | NEC2_FURIN_NEC1     | 614.337405 | 2.050192817    | 0.1300137  | 15.7690521 |
| KH.C9.849  |                     | 19.5261845 | 1.99236494     | 0.64535057 | 3.08725993 |
| KH.C6.145  | CHRD                | 3551.06252 | 1.989508716    | 0.07877182 | 25.2566053 |
| KH.C12.182 |                     | 143.128989 | 1.856966054    | 0.2418488  | 7.67821064 |
| KH.L139.24 |                     | 189.357687 | 1.802582911    | 0.20876398 | 8.63454961 |
| KH.C7.92   |                     | 20.0146356 | 1.752459533    | 0.6229215  | 2.81329113 |
| KH.C3.474  | MDGA1_PGBM_MDGA     | 130.156855 | 1.722752126    | 0.26030488 | 6.61820903 |
| KH.S346.10 | KCNQ5_KCNQ1_KCNQ3   | 217.325515 | 1.722258948    | 0.20295604 | 8.48587176 |
| KH.L147.13 | CXG1_CXD2_CXG2      | 41.9184623 | 1.66612552     | 0.41454584 | 4.01915867 |
| KH.C6.284  | T150A               | 79.6901447 | 1.653680469    | 0.33673651 | 4.91090345 |
| KH.C1.396  | SOGA3_MTCL1_SOGA1   | 1266.21288 | 1.632075912    | 0.09524428 | 17.1356836 |
| KH.C2.503  | LOXL3_LOXL4_LOXL2   | 450.86231  | 1.628253539    | 0.14514733 | 11.2179363 |
| KH.C10.545 |                     | 101.769189 | 1.588513197    | 0.28008766 | 5.67148581 |
| KH.C5.490  |                     | 195.433367 | 1.558107236    | 0.21765595 | 7.15857878 |
| KH.S1075.1 | CECR5               | 1156.96223 | 1.528720891    | 0.11777952 | 12.9795133 |
| KH.S663.4  | TX264               | 636.576013 | 1.526991912    | 0.12918996 | 11.8197414 |
| KH.L147.29 | CXG1_CXD2_CXA8_CXA9 | 46.7633088 | 1.513335339    | 0.39049765 | 3.87540196 |
| KH.C7.700  |                     | 39.4910071 | 1.501655652    | 0.41679027 | 3.60290477 |
| KH.C2.1128 | BGLR_BGP11          | 355.745844 | 1.479425327    | 0.15048849 | 9.83082023 |
| KH.C2.14   |                     | 412.509135 | 1.46511129     | 0.14447138 | 10.1411871 |

|            |                   |            |             |            |            |
|------------|-------------------|------------|-------------|------------|------------|
| KH.C7.140  |                   | 295.313924 | 1.464032136 | 0.1641054  | 8.92129169 |
| KH.C6.185  | ONEC2_HNF6_ONEC3  | 1303.07797 | 1.463122069 | 0.10407052 | 14.0589478 |
| KH.C3.318  |                   | 60.3119635 | 1.422997776 | 0.3398831  | 4.18672708 |
| KH.C12.301 | FSTL5_FSTL4       | 2638.25216 | 1.422451884 | 0.20278585 | 7.01455186 |
| KH.C7.131  | ADA2A_ADA2B_ADA2C | 122.801665 | 1.422099739 | 0.2466756  | 5.76506051 |
| KH.C11.589 |                   | 72.9601    | 1.401248765 | 0.32843033 | 4.26650234 |
| KH.C6.192  | SVEP1_NOTC2_CRUM2 | 50.9622832 | 1.389325459 | 0.37146277 | 3.74014724 |
| KH.C5.440  | LRC15_LRIG3_PODN  | 31.2508151 | 1.385390014 | 0.49121184 | 2.82035143 |
| KH.L172.15 |                   | 591.920597 | 1.35458692  | 0.1372094  | 9.87240584 |
| KH.C3.591  |                   | 237.86228  | 1.351395688 | 0.19623746 | 6.88653278 |
| KH.C12.521 | CALM_TNNC2_CALL6  | 34.9285099 | 1.337194137 | 0.45268803 | 2.95389771 |
| KH.C2.402  | MB211_MB212_MB213 | 236.007156 | 1.334927376 | 0.19958571 | 6.68849176 |
| KH.C7.550  |                   | 62.3862016 | 1.328342687 | 0.38664548 | 3.43555726 |
| KH.C3.328  |                   | 162.172818 | 1.319450987 | 0.27764347 | 4.7523213  |
| KH.C1.118  |                   | 115.085801 | 1.290871678 | 0.24676393 | 5.23120084 |
| KH.C1.502  | CSMD3_CSMD1_CSMD2 | 577.002268 | 1.279996807 | 0.14604891 | 8.76416537 |
| KH.C1.90   | S2536_S2533_ODC   | 787.725738 | 1.279462653 | 0.14191119 | 9.01593938 |
| KH.S583.2  |                   | 86.3819703 | 1.275430456 | 0.29568985 | 4.3134063  |
| KH.L71.26  | GNRHR_GNRR2_V1AR  | 52.7210559 | 1.266033944 | 0.44049544 | 2.87411365 |
| KH.C7.534  | FBCD1_MFAP4_TENR  | 35.732852  | 1.25662932  | 0.43887292 | 2.86331026 |
| KH.C9.65   | DPP4_DPP10_DPP6   | 703.762748 | 1.244859682 | 0.28624229 | 4.34897191 |
| KH.L6.1    | RFNG_LFNG_MFNG    | 69.2717571 | 1.24241483  | 0.32701459 | 3.79926428 |
| KH.C1.1221 |                   | 66.4237272 | 1.238118557 | 0.33210951 | 3.72804306 |
| KH.C4.358  | TSP2_TSP1_TSP4    | 401.107381 | 1.180492135 | 0.14130134 | 8.35442982 |
| KH.C3.462  |                   | 59.3898609 | 1.163210488 | 0.34448191 | 3.37669538 |
| KH.C4.378  | INSM2_INSM1       | 205.581909 | 1.1564813   | 0.19983584 | 5.78715669 |
| KH.C5.451  |                   | 65.3833632 | 1.145774831 | 0.33063125 | 3.465416   |
| KH.S698.1  |                   | 164.564481 | 1.143024431 | 0.22238451 | 5.13985638 |
| KH.C2.785  | VASN_FLRT1_LRRC4  | 651.966918 | 1.14043133  | 0.1478064  | 7.7157099  |
| KH.L170.62 |                   | 54.0145817 | 1.121741866 | 0.35768839 | 3.13608684 |
| KH.C3.843  |                   | 196.933578 | 1.113443396 | 0.19057852 | 5.84243912 |
| KH.C9.352  | AN33B_ANR33       | 106.92854  | 1.104673867 | 0.25334866 | 4.36029096 |
| KH.S1148.2 | KCNJ3_KCNJ5_KCNJ6 | 52.9181028 | 1.097062153 | 0.36326202 | 3.02002989 |
| KH.C12.135 | LIGO1             | 341.391638 | 1.093643799 | 0.18036086 | 6.06364272 |
| KH.C11.160 | CXG1_CXG2_CXD3    | 425.273974 | 1.081912209 | 0.1412877  | 7.65751188 |
| KH.S765.1  |                   | 1599.73587 | 1.059003011 | 0.09166241 | 11.5532965 |
| KH.S2128.1 |                   | 150.101159 | 1.04768674  | 0.27020879 | 3.87732297 |
| KH.C6.128  | CELF3_CELF5_CELF6 | 7627.62372 | 1.0474983   | 0.07665831 | 13.6645113 |
| KH.C1.521  | RXFP1_LRP1B_LRP1  | 84.1282015 | 1.036234077 | 0.2889083  | 3.58672314 |
| KH.C5.630  |                   | 336.501648 | 1.033522173 | 0.15650076 | 6.60394349 |
| KH.C4.761  | ADH1A_ADH1B_ADH1C | 197.229554 | 1.027123951 | 0.23173384 | 4.43234329 |

|            |                     |            |             |            |            |
|------------|---------------------|------------|-------------|------------|------------|
| KH.L172.21 | AS3MT               | 148.880975 | 1.010661485 | 0.22642149 | 4.46362884 |
| KH.C1.659  |                     | 77.8463017 | 1.009207729 | 0.3092427  | 3.2634812  |
| KH.L19.15  |                     | 516.408462 | 0.992223819 | 0.13040771 | 7.60862854 |
| KH.C2.614  | ADA                 | 169.240817 | 0.983190437 | 0.21482345 | 4.5767371  |
| KH.C4.777  | SVEP1_CFAH_FHR5     | 314.973765 | 0.968668038 | 0.16991299 | 5.70096508 |
| KH.C9.462  | SCN2A_SCN1A_SCN3A   | 1218.34702 | 0.966339458 | 0.1086522  | 8.8938781  |
| KH.C1.274  | MYT1L_MYT1_ST18     | 1078.25983 | 0.965516325 | 0.10719976 | 9.00670228 |
| KH.C9.872  | ATOH8               | 1564.04493 | 0.958032118 | 0.10930126 | 8.76506013 |
| KH.C3.390  | MYPC3_TITIN_IGFN1   | 150.960814 | 0.94612053  | 0.22609841 | 4.18455184 |
| KH.L154.42 | SOX9_SOX10_SOX8     | 117.786526 | 0.927125861 | 0.24841416 | 3.73217802 |
| KH.C9.496  |                     | 1974.7567  | 0.924624563 | 0.09834596 | 9.40175488 |
| KH.L92.3   | ASM3B_ASM3A_ASM     | 63.5886172 | 0.903212779 | 0.32557784 | 2.77418379 |
| KH.C8.890  | FOXD4_FOXD1_FOXD3   | 106.014761 | 0.9030028   | 0.28008121 | 3.22407486 |
| KH.L50.6   | DLL1_DLK2_DLK1      | 589.558034 | 0.902634945 | 0.1415868  | 6.37513475 |
| KH.L118.4  | CTRB2_CTRB1_CTRL    | 506.464221 | 0.889144561 | 0.13588031 | 6.54358664 |
| KH.C2.56   | PCYOX_PCYXL         | 203.423282 | 0.887857413 | 0.1908779  | 4.65144159 |
| KH.C4.394  | TRAF4_TRAF2_TRAF6   | 1092.13173 | 0.885474704 | 0.09562826 | 9.2595505  |
| KH.S1835.1 |                     | 146.716699 | 0.844370808 | 0.22033815 | 3.83215898 |
| KH.C10.40  | SERC                | 2236.41459 | 0.829577915 | 0.29031948 | 2.85746558 |
| KH.C6.205  |                     | 360.231918 | 0.828221026 | 0.15893916 | 5.21093134 |
| KH.C1.1067 | NCS1_NCALD_HPCA     | 84.842717  | 0.828139151 | 0.29130348 | 2.84287424 |
| KH.C10.464 |                     | 189.506486 | 0.824895287 | 0.19816762 | 4.16261398 |
| KH.L9.43   | FZD7_FZD3_FZD6      | 353.404387 | 0.815635538 | 0.1452534  | 5.61525945 |
| KH.C8.396  | FOXD4_FOXD1_FOXD3   | 127.505923 | 0.809093653 | 0.25804645 | 3.13545746 |
| KH.L119.20 |                     | 174.761012 | 0.809003501 | 0.20044421 | 4.0360532  |
| KH.S1313.1 |                     | 461.080635 | 0.808256887 | 0.1417165  | 5.7033365  |
| KH.C2.805  |                     | 401.6856   | 0.806635772 | 0.14509983 | 5.55917813 |
| KH.L18.43  | KCP_VWF_OTOGL       | 615.886874 | 0.797819822 | 0.1488877  | 5.35853426 |
| KH.L96.61  |                     | 100.219985 | 0.796639923 | 0.2614475  | 3.04703598 |
| KH.S761.6  | CSAD_DCE1_DCE2      | 394.38992  | 0.795169599 | 0.1502011  | 5.29403309 |
| KH.C3.178  | SEGN_CALB2_CALB1    | 148.293577 | 0.778514962 | 0.21768564 | 3.57632676 |
| KH.C9.770  |                     | 322.459853 | 0.774468917 | 0.15944321 | 4.85733385 |
| KH.C1.481  | HPGDS_GSTA3_GSTA2   | 621.716277 | 0.760821765 | 0.13235124 | 5.74850483 |
| KH.C7.4    | MOT14_MOT5_MOT1     | 2027.98415 | 0.75701097  | 0.0862466  | 8.77728485 |
| KH.C7.173  | CTR2_CTR1_S7A14     | 425.683008 | 0.753354327 | 0.14725112 | 5.11611968 |
| KH.C9.162  | RGS4_RGS8_RGS21     | 351.896743 | 0.744793522 | 0.15321325 | 4.86115597 |
| KH.C2.924  | S22A5_S22A4_S22AF_5 | 100.183957 | 0.744586006 | 0.25798042 | 2.88621136 |
| KH.C1.340  | MMP14_MMP24_MMP     | 423.711976 | 0.743848746 | 0.15154095 | 4.90856609 |
| KH.C2.765  | RIMS2_RIMS1_PCLO    | 884.865796 | 0.739973383 | 0.1138644  | 6.4987245  |
| KH.L170.66 |                     | 1663.20353 | 0.736975079 | 0.09234468 | 7.9806987  |
| KH.C1.983  | KLF10_KLF11_SP4     | 779.250559 | 0.736706414 | 0.13581852 | 5.42419688 |

|            |                    |            |             |            |            |
|------------|--------------------|------------|-------------|------------|------------|
| KH.C12.352 | MUC5A_MUC2_VWF     | 250.276894 | 0.732076616 | 0.2024446  | 3.61618246 |
| KH.S1526.1 | RIMS2_RIMS1_RIMS3  | 541.572595 | 0.723302956 | 0.12708685 | 5.69140674 |
| KH.C1.314  | RGS19_RGS17_RGS20  | 511.553883 | 0.705098558 | 0.12975269 | 5.43417303 |
| KH.C11.220 | BMI1_PCGF3_PCGF2   | 995.48459  | 0.702945288 | 0.10967761 | 6.4091958  |
| KH.L167.5  | S6A11_S6A13_S6A12  | 1135.12698 | 0.702861227 | 0.10251552 | 6.85614437 |
| KH.L9.36   | KCNK9_KCNK3_KCNKF  | 369.786956 | 0.700242094 | 0.1434016  | 4.88308424 |
| KH.C3.67   | IRX6_IRX4_IRX2     | 178.087189 | 0.69128245  | 0.20420969 | 3.38515991 |
| KH.C3.273  | NRX1A_NRX2A_NRX3A  | 572.024055 | 0.686781976 | 0.15421022 | 4.45354387 |
| KH.C2.245  | B3GN2_B3GN7_B3GN6  | 247.767671 | 0.684331386 | 0.1917298  | 3.56924904 |
| KH.C9.102  | FA78B_FA78A        | 1027.70937 | 0.682264064 | 0.09880181 | 6.90538011 |
| KH.C8.263  | ZSWM6_ZSWM5_ZSWI   | 815.460536 | 0.679673025 | 0.1072193  | 6.33909244 |
| KH.C9.672  | RGS4_RGS8_RGS21    | 419.616516 | 0.679463322 | 0.15015103 | 4.52519937 |
| KH.L22.28  | GABR1_GABR2        | 179.5732   | 0.678766467 | 0.20661756 | 3.28513443 |
| KH.C9.587  | CI171              | 382.415333 | 0.673116765 | 0.14388624 | 4.67811762 |
| KH.C4.102  | ATS6_ATS7_ATS12    | 727.190898 | 0.669219454 | 0.12367672 | 5.41103799 |
| KH.L154.30 | BACH2_ZBT46_ZBT44_ | 223.424356 | 0.660981587 | 0.18515928 | 3.56979988 |
| KH.S1346.2 | KIF1A_KIF1C_KIF28  | 177.106493 | 0.65980493  | 0.19713566 | 3.34695883 |
| KH.C2.674  | GCYB1_GCYB2_GCYA2  | 301.597672 | 0.655922962 | 0.16312333 | 4.02102477 |
| KH.C11.185 | KI26B_KI26A_KIF9   | 338.588406 | 0.649484166 | 0.1513879  | 4.29019855 |
| KH.C11.8   | S39A1_S39A3_S39A2  | 1460.58992 | 0.64637951  | 0.11201774 | 5.77033181 |
| KH.C2.731  | TECTA              | 132.965743 | 0.63822025  | 0.22827886 | 2.79579216 |
| KH.L81.2   | RGL1_GNDS_RGL3     | 582.512538 | 0.637245099 | 0.13394792 | 4.75740938 |
| KH.C7.465  | ST1C2_ST6B1_ST1C4  | 268.547717 | 0.635511906 | 0.17368439 | 3.65900422 |
| KH.C3.157  | KIF1A_KIF1C_KIF28  | 205.947503 | 0.613740296 | 0.19802599 | 3.09929161 |
| KH.C9.237  | DYH7_DYH3_DYH1     | 966.984982 | 0.609076424 | 0.10167886 | 5.99019704 |
| KH.C7.122  | ST1C2_ST6B1_ST1C4  | 270.458404 | 0.608048897 | 0.18264764 | 3.32908152 |
| KH.C4.760  | CD5R1_CD5R2        | 1001.31399 | 0.604005906 | 0.09941183 | 6.07579539 |
| KH.L18.74  | EFHC1_EFHC2        | 385.4741   | 0.596555544 | 0.14300536 | 4.17156068 |
| KH.L23.9   | TAB1               | 422.223943 | 0.595702389 | 0.16375137 | 3.63784687 |
| KH.C3.285  | TEKT4_TEKT1_TEKT3  | 181.634149 | 0.595665556 | 0.19401299 | 3.07023542 |
| KH.C4.628  | PTN13_FRPD2        | 395.074255 | 0.593611975 | 0.16231652 | 3.65712601 |
| KH.C7.157  |                    | 318.760558 | 0.590548836 | 0.16434224 | 3.59340865 |
| KH.C14.20  |                    | 223.927614 | 0.583965588 | 0.17825312 | 3.27604702 |
| KH.C2.433  | GLP1R_PTH1R_GLP2R_ | 173.83537  | 0.583914424 | 0.19768141 | 2.95381556 |
| KH.L9.14   | JIP1_JIP2          | 208.75969  | 0.583737889 | 0.1822536  | 3.20288808 |
| KH.C2.336  | BMP6_BMP5_BMP7     | 452.506556 | 0.582902121 | 0.13120339 | 4.44273676 |
| KH.L157.6  | SIK3_SIK2_SIK1     | 1580.60886 | 0.581600645 | 0.09451917 | 6.15325568 |
| KH.C3.640  | S38A4_S38A3_S38A2  | 3382.20423 | 0.580469906 | 0.0945336  | 6.14035544 |
| KH.C7.692  |                    | 402.605996 | 0.577766143 | 0.16072169 | 3.59482381 |
| KH.C10.125 |                    | 450.505441 | 0.562623989 | 0.13567579 | 4.1468266  |
| KH.C7.334  | GLI2_GLI3_GLI1     | 476.837973 | 0.562505962 | 0.13367991 | 4.20785726 |

|            |                     |            |             |            |            |
|------------|---------------------|------------|-------------|------------|------------|
| KH.L18.65  | PDE6C_PDE6B_PDE6A_  | 638.475392 | 0.562109064 | 0.12898321 | 4.35800176 |
| KH.C1.744  |                     | 236.891186 | 0.559777779 | 0.17763191 | 3.15133568 |
| KH.C10.406 |                     | 331.073126 | 0.55868389  | 0.15803667 | 3.53515346 |
| KH.C6.77   |                     | 255.258178 | 0.554567646 | 0.18118626 | 3.06075992 |
| KH.L71.1   | RBPMS_RBPS2         | 392.939901 | 0.550425954 | 0.14992537 | 3.67133291 |
| KH.C11.495 | SSR2_RL3R1_SSR5     | 340.76785  | 0.543271918 | 0.16473105 | 3.2979327  |
| KH.C3.354  |                     | 909.350847 | 0.541454869 | 0.10384876 | 5.2138788  |
| KH.C9.192  | RUND1               | 576.789883 | 0.539303811 | 0.12632452 | 4.26919346 |
| KH.C10.25  | RSPH1_MORN1_ALS2    | 247.02765  | 0.535201226 | 0.17197893 | 3.11201633 |
| KH.C1.432  | CHKA_CHKB_EKI1_EKI2 | 1086.13606 | 0.531700785 | 0.11713215 | 4.53932421 |
| KH.C9.32   | PCD18_PCD19_PCDA6   | 1594.99705 | 0.525673037 | 0.10510005 | 5.00164406 |
| KH.C8.223  | HTD2                | 1142.89996 | 0.523122418 | 0.11920267 | 4.38851256 |
| KH.L152.2  | ISL1_ISL2_LHX9      | 725.166324 | 0.514957216 | 0.11606096 | 4.43695451 |
| KH.C10.250 | RFOX3_RFOX2_RFOX1   | 2295.21427 | 0.509223451 | 0.08317947 | 6.1219845  |
| KH.S1159.1 | FLI1                | 572.63844  | 0.5023677   | 0.12077571 | 4.15950952 |
| KH.C8.585  | ANO4_ANO5_ANO7      | 482.8343   | 0.494019791 | 0.13127985 | 3.76310455 |
| KH.C12.8   |                     | 1275.08517 | 0.492111533 | 0.09065267 | 5.42853852 |
| KH.C7.207  | FOXP4_FOXP1_FOXP2   | 510.31066  | 0.492047448 | 0.13382215 | 3.67687587 |
| KH.C10.488 | RSH4A_RSH6A         | 361.638722 | 0.491687132 | 0.14471086 | 3.39772103 |
| KH.C10.493 |                     | 432.899531 | 0.47869781  | 0.1460764  | 3.27703723 |
| KH.L96.50  | TLE4_TLE1_TLE3      | 1345.51848 | 0.477974984 | 0.10505103 | 4.54993142 |
| KH.C10.566 |                     | 545.362624 | 0.469481895 | 0.13251086 | 3.54296921 |
| KH.C9.78   | FUT6_FUT5_FUT3      | 637.468328 | 0.468720133 | 0.13006009 | 3.60387367 |
| KH.C14.435 | ANR10_ASB2_ANR37    | 652.05005  | 0.468157008 | 0.12065015 | 3.8802853  |
| KH.C7.770  | DLX1_DLX6_DLX5      | 489.385473 | 0.460364809 | 0.14824965 | 3.10533478 |
| KH.C3.312  | HES1_HES4_HES6_HES7 | 1051.51891 | 0.456076723 | 0.09744174 | 4.680507   |
| KH.L4.36   | HMGB3_HMGB1_HMG     | 1274.41145 | 0.455717712 | 0.08954554 | 5.0892283  |
| KH.S1462.1 | KCP_BMPER_VWF       | 352.859204 | 0.45502436  | 0.14568667 | 3.12330811 |
| KH.C3.699  | ABCG2_ABCG4_ABCG1   | 1040.10058 | 0.438087697 | 0.09849873 | 4.44764812 |
| KH.S618.2  | MCF2L_MCF2_MF2L2    | 366.015014 | 0.433890978 | 0.15462426 | 2.80609898 |
| KH.S1090.3 |                     | 362.36396  | 0.432949916 | 0.15488663 | 2.79526972 |
| KH.C8.892  | TBA1C_TBA1A_TBA3C   | 12524.5009 | 0.427456476 | 0.08310539 | 5.14354669 |
| KH.S980.1  | BPTF                | 3193.85587 | 0.41906413  | 0.0862073  | 4.86112114 |
| KH.C1.822  |                     | 1183.58226 | 0.417466025 | 0.09722855 | 4.29365667 |
| KH.L40.4   | 4EBP2_4EBP1_4EBP3   | 495.900413 | 0.414810772 | 0.13118808 | 3.16195485 |
| KH.C5.112  | DPYD                | 771.371352 | 0.409291897 | 0.11727442 | 3.49003555 |
| KH.L173.8  | PTHB1               | 426.394437 | 0.405679405 | 0.13520227 | 3.00053697 |
| KH.C1.905  | DYH2_DYH10_DYH8     | 505.178103 | 0.405066391 | 0.12607233 | 3.21296823 |
| KH.C1.1079 | DUS1_DUS4_DUS2      | 404.843454 | 0.396946962 | 0.14051223 | 2.82499942 |
| KH.C7.523  | SOX4_SOX11_SOX12    | 863.462388 | 0.394584861 | 0.10582357 | 3.72870506 |
| KH.C2.506  | LBR_DHCR7_ERG24     | 1513.85515 | 0.394207702 | 0.0872218  | 4.51960063 |

|            |                     |            |             |            |            |
|------------|---------------------|------------|-------------|------------|------------|
| KH.C7.717  |                     | 1011.69658 | 0.393266102 | 0.10981306 | 3.58123258 |
| KH.C4.539  | FLI1_ERG_FEV        | 1170.78487 | 0.390037226 | 0.10118507 | 3.85469132 |
| KH.S583.1  | IQCD                | 563.768494 | 0.38969261  | 0.13231046 | 2.94528942 |
| KH.L116.85 | TBB4B_TBB2B_TBB5_T  | 21326.9775 | 0.389489602 | 0.08520863 | 4.57101132 |
| KH.C13.66  | CAC1S_CAC1C_CAC1F   | 1611.01202 | 0.388582712 | 0.08850492 | 4.39052103 |
| KH.C12.380 | PLCD_PLCC_PLCE_LCLT | 1115.40359 | 0.384881564 | 0.09831455 | 3.91479745 |
| KH.L18.112 | BPTF                | 575.301493 | 0.380987849 | 0.12612822 | 3.02063926 |
| KH.C7.594  | ABCG2_ABCG4_ABCG1   | 752.849246 | 0.378703135 | 0.1072283  | 3.53174625 |
| KH.C4.719  | SEM6A_SEM6D_SEM6E   | 2762.75822 | 0.374155155 | 0.09728187 | 3.84609331 |
| KH.S982.4  |                     | 583.555079 | 0.364953596 | 0.11985317 | 3.04500578 |
| KH.L65.10  | DYRK4_DYRK2_DYRK3   | 929.175598 | 0.360870385 | 0.12200059 | 2.95793976 |
| KH.C6.65   | CAC1G_CAC1I_CAC1H   | 2219.83256 | 0.358100968 | 0.08616035 | 4.15621525 |
| KH.C14.166 | ZNT10_ZNT5_ZNT1     | 1723.20197 | 0.357776026 | 0.09985404 | 3.58299004 |
| KH.C5.654  |                     | 712.293271 | 0.357490698 | 0.11564491 | 3.09127909 |
| KH.C13.96  | THEM6               | 525.55453  | 0.355104816 | 0.12323468 | 2.88153314 |
| KH.C11.108 | MED14               | 830.634092 | 0.350573676 | 0.10851406 | 3.23067527 |
| KH.C7.21   | TITIN_PALLD_MYPN_M  | 3152.07007 | 0.34824942  | 0.07938222 | 4.38699539 |
| KH.C1.329  | RAB7A_RAB10_RAN     | 3573.8241  | 0.344406526 | 0.07961716 | 4.32578274 |
| KH.C10.459 |                     | 2382.92408 | 0.343719203 | 0.08231353 | 4.17573172 |
| KH.C9.371  | MUSK_DDR2_DDR1      | 1082.07699 | 0.343261463 | 0.11660973 | 2.94367773 |
| KH.C8.159  | NAC1_NAC3_NAC2      | 868.954466 | 0.342133114 | 0.11026708 | 3.10276759 |
| KH.L9.16   | CCND3_CCND2_CCND1   | 3694.02958 | 0.340038358 | 0.0931349  | 3.65103031 |
| KH.C14.448 | TFAP4               | 833.707211 | 0.338576408 | 0.11061078 | 3.06097121 |
| KH.C3.596  |                     | 892.031192 | 0.338244201 | 0.10049733 | 3.36570337 |
| KH.C1.916  | PPBT_PPBI_PPBN      | 1566.18478 | 0.336057115 | 0.09711766 | 3.46030901 |
| KH.C10.403 |                     | 865.618921 | 0.335607168 | 0.10871357 | 3.08707705 |
| KH.C1.964  | LRIQ1               | 1127.25526 | 0.335601568 | 0.11343895 | 2.95843319 |
| KH.L18.39  | MIB1_MIB2           | 879.294135 | 0.3315942   | 0.10184273 | 3.25594381 |
| KH.L162.6  | CACB2_CACB4_CACB1   | 2251.51509 | 0.329452058 | 0.10660156 | 3.09049952 |
| KH.L118.3  | SHAN2_SHAN3         | 591.323631 | 0.329040729 | 0.11856181 | 2.77526746 |
| KH.C2.36   | FRIH_FTMT_FHL17     | 20018.2485 | 0.328762821 | 0.06386054 | 5.14813739 |
| KH.L46.15  | S18B1               | 625.046785 | 0.323422382 | 0.1141381  | 2.83360593 |
| KH.L10.5   | KCRB_KCRS_KCRM      | 1214.18026 | 0.319675118 | 0.09344859 | 3.420866   |
| KH.C1.777  | ZEB1_ZEB2_ZN232     | 1204.48403 | 0.319241804 | 0.09764511 | 3.26940908 |
| KH.C1.478  | MINT                | 1625.04468 | 0.315691809 | 0.09363407 | 3.37154867 |
| KH.L96.41  | AMPD2_AMPD3_AMPD    | 1220.53383 | 0.314630361 | 0.09338775 | 3.36907546 |
| KH.L154.10 | SMTN_SMTL2_SMTL1    | 1586.71228 | 0.313945919 | 0.08379665 | 3.74652098 |
| KH.C1.448  | RPGP1_RPGP2_SI1L2_S | 1396.30619 | 0.311693709 | 0.10970413 | 2.84122131 |
| KH.L68.2   | STMN2               | 1003.97052 | 0.308190293 | 0.09652643 | 3.19280721 |
| KH.L87.11  | KCC4_PHKG2_PHKG1    | 954.33409  | 0.306944604 | 0.09992275 | 3.07181889 |
| KH.C1.677  | KDM5A_KDM5C_KDM5    | 4362.57241 | 0.305999937 | 0.07070119 | 4.32807349 |

|            |                   |            |             |            |            |
|------------|-------------------|------------|-------------|------------|------------|
| KH.C12.263 | SESN1_SESN3_SESN2 | 4371.20388 | 0.302676021 | 0.07706005 | 3.92779428 |
| KH.C4.739  | CIC_BBX           | 2399.49573 | 0.30210907  | 0.08045323 | 3.75508955 |
| KH.C1.571  | PLOD3_PLOD1_PLOD2 | 7256.11638 | 0.30198168  | 0.07485657 | 4.0341372  |
| KH.C8.372  | ASAH2             | 1567.94761 | 0.29941707  | 0.10790731 | 2.77476177 |
| KH.C2.69   | AQP4_AQP1_MIP     | 2036.31056 | 0.293319318 | 0.08440502 | 3.47514071 |
| KH.S403.5  | PPGB_CPVL         | 4178.8099  | 0.290787158 | 0.07914899 | 3.67392121 |
| KH.C1.94   | MIB1_ANK3_MIB2    | 2041.6858  | 0.286500526 | 0.08186608 | 3.49962435 |
| KH.S1172.1 |                   | 869.456629 | 0.28633983  | 0.10160313 | 2.81821863 |
| KH.C11.235 | ELOV4_ELOV1_ELOV5 | 1303.62291 | 0.286319334 | 0.09215326 | 3.10699072 |
| KH.L96.13  | BIG3              | 1639.88632 | 0.284965572 | 0.08477097 | 3.3615939  |
| KH.C4.441  |                   | 1073.22839 | 0.282486946 | 0.09468617 | 2.98340239 |
| KH.C7.448  | RPC1_RPA1_RPB1    | 5550.94701 | 0.282448783 | 0.0694794  | 4.0652165  |
| KH.C2.780  | SRSF4_SRSF6_SRSF5 | 2797.81364 | 0.282370763 | 0.08839933 | 3.19426379 |
| KH.C12.608 | TET1_TET2_TET3    | 2112.17164 | 0.28124609  | 0.10140564 | 2.77347575 |
| KH.C1.535  | GWL_MAST2_MAST1_I | 1687.19983 | 0.277339952 | 0.08466589 | 3.2756988  |
| KH.C1.264  | YBOX1_YBOX3_YBOX2 | 6723.59743 | 0.276582239 | 0.07460315 | 3.70738032 |
| KH.S1482.2 | ABCD2_ABCD1_ABCD3 | 2072.30081 | 0.27624296  | 0.07848229 | 3.51981264 |
| KH.C2.441  | RIR1              | 2118.28203 | 0.266321767 | 0.08979821 | 2.9657803  |
| KH.L131.10 | MFSD6             | 1450.94461 | 0.265940398 | 0.08730391 | 3.04614523 |
| KH.C8.400  | RAB3C_RAB3A_RAB3B | 3467.79551 | 0.265637679 | 0.0774612  | 3.42930002 |
| KH.C5.558  | RIMB1_RIMB2_RIM3A | 1457.55729 | 0.265569543 | 0.09557655 | 2.77860559 |
| KH.L6.5    | SMCA2_SMCA4       | 2429.98677 | 0.261665783 | 0.07997479 | 3.27185322 |
| KH.C2.466  |                   | 2812.79227 | 0.261222388 | 0.08729544 | 2.99239454 |
| KH.C9.571  | ANR50_ANKH1_ANR17 | 2451.07758 | 0.252751322 | 0.08656489 | 2.91979033 |
| KH.C3.389  | RAB2A_RAB14_RAB2B | 3295.17945 | 0.249061282 | 0.07958754 | 3.1294005  |
| KH.C14.103 | TM131_T131L       | 4913.77235 | 0.24339654  | 0.06808769 | 3.57475115 |
| KH.C1.116  | HCFC1_HCFC2_KLDC3 | 5955.06884 | 0.240379783 | 0.06474983 | 3.71243889 |
| KH.C9.64   | NH2L1_NHP2        | 2207.6195  | 0.239957538 | 0.08207041 | 2.92380102 |
| KH.C3.329  | SAHH3_SAHH2_SAHH  | 3049.98708 | 0.23518887  | 0.0736155  | 3.19482808 |
| KH.C12.317 | ROAA_HNRDL_HNRPD  | 14325.0276 | 0.231196116 | 0.07582514 | 3.04906944 |
| KH.C14.534 | ADCY9_ADCY8_ADCY3 | 4200.89884 | 0.230911354 | 0.0723861  | 3.18999577 |
| KH.L107.1  | SMRC2_SMRC1       | 1805.98278 | 0.230340868 | 0.0820423  | 2.80758674 |
| KH.C12.278 | CHD9_CHD8_CHD7    | 10588.9409 | 0.229314839 | 0.07371855 | 3.11068032 |
| KH.C8.314  | ARI5B_ARI5A       | 2713.73013 | 0.229287155 | 0.08055646 | 2.84629128 |
| KH.C2.57   | YTHD2_YTHD1_YTHD3 | 5426.46808 | 0.224250101 | 0.07532108 | 2.97725572 |
| KH.C8.248  | COOA1_CO4A6_CO9A1 | 14829.1241 | 0.220583963 | 0.06615328 | 3.33443737 |
| KH.C9.589  | BRD4_BRDT_BRD3    | 8045.32309 | 0.218934216 | 0.06579923 | 3.32730677 |
| KH.C4.623  | PSMD2             | 4029.55334 | 0.216709503 | 0.06955195 | 3.11579341 |
| KH.S638.5  | MTMRD_MTMR5_MAC   | 2603.11202 | 0.215887163 | 0.07569789 | 2.85195731 |
| KH.C10.81  | 2A5A_2A5D_2A5G    | 3985.8828  | 0.213157354 | 0.07386196 | 2.88588827 |
| KH.L58.2   | HNRL1_HNRPU_HNRL2 | 9054.22482 | 0.212091465 | 0.06544737 | 3.24064135 |

|            |                       |            |             |            |            |
|------------|-----------------------|------------|-------------|------------|------------|
| KH.C10.61  | DYR1A_DYRK4_DYR1B     | 2603.69424 | 0.211415028 | 0.07575133 | 2.7909086  |
| KH.C12.116 | PAX8_PAX5_PAX2        | 5035.02823 | 0.209648199 | 0.07456436 | 2.81164081 |
| KH.C1.931  | GRB1L_GREB1           | 5232.54549 | 0.188974369 | 0.06600853 | 2.86287813 |
| KH.L57.1   | NOMO1_NOMO2_NOM       | 6103.03436 | 0.18509673  | 0.06601252 | 2.80396409 |
| KH.C9.38   | FUBP3_FUBP2_FUBP1     | 16111.054  | 0.184754491 | 0.06365117 | 2.90260932 |
| KH.C5.114  | S61A2_S61A1           | 23915.2614 | -0.1816933  | 0.05945247 | -3.0561104 |
| KH.C3.676  |                       | 6641.06369 | -0.19098569 | 0.06621638 | -2.8842664 |
| KH.C1.262  | KTAP2                 | 10251.9848 | -0.19575947 | 0.06488163 | -3.0171789 |
| KH.L141.10 |                       | 6188.93909 | -0.19736235 | 0.0696943  | -2.8318291 |
| KH.C2.1086 | RPN2                  | 14008.635  | -0.19875467 | 0.06766336 | -2.9374048 |
| KH.C9.16   | S4A4_S4A10_S4A8       | 4807.63178 | -0.20077815 | 0.06662163 | -3.0137081 |
| KH.C1.835  | ERGI1_ERGI3           | 7471.9318  | -0.20314163 | 0.06302996 | -3.2229374 |
| KH.L122.10 | L2HDH                 | 4510.38137 | -0.20593188 | 0.06726293 | -3.0615955 |
| KH.C1.1299 | VIGLN                 | 38885.3265 | -0.20610537 | 0.0594894  | -3.4645729 |
| KH.C9.559  | UAP1_UAP1L            | 3458.21273 | -0.21029273 | 0.07436693 | -2.8277721 |
| KH.C14.391 | SEM6A_SEM6D_SEM6E     | 2665.41858 | -0.22186378 | 0.07765077 | -2.8572001 |
| KH.C4.253  | SRC8_HCLS1_DBNL       | 1612.89007 | -0.23625344 | 0.08390434 | -2.8157474 |
| KH.C3.502  | SYNE2_SYNE1_SYNE3     | 6884.84767 | -0.24436911 | 0.06391336 | -3.8234433 |
| KH.C4.90   | S35F6                 | 1749.10078 | -0.25012179 | 0.08163702 | -3.0638279 |
| KH.C9.203  | CGL                   | 2368.75714 | -0.25159183 | 0.08538186 | -2.946666  |
| KH.C7.425  | S35E3                 | 1905.4671  | -0.25746855 | 0.08258008 | -3.1178048 |
| KH.S655.2  | CO4A1_CO4A6_CO4A3     | 20478.0803 | -0.26223605 | 0.07443177 | -3.5231738 |
| KH.C2.421  | BMP3_BMP2_GDF6_CI     | 2455.22161 | -0.26565729 | 0.0886528  | -2.9966037 |
| KH.C2.10   | HXK1_HXK2_HKDC1       | 6107.29735 | -0.26731102 | 0.06772118 | -3.9472294 |
| KH.C3.672  | S38A7_S38A8_S38A1     | 1745.17523 | -0.26892638 | 0.08470071 | -3.1750191 |
| KH.C8.476  | LOXL3_LOXL4_LOXL2     | 1294.264   | -0.26979224 | 0.09140445 | -2.9516312 |
| KH.C14.520 |                       | 7863.3147  | -0.27130426 | 0.06627792 | -4.0934334 |
| KH.C2.403  | DYH9_DYH11_DYH17      | 1090.58526 | -0.27342813 | 0.09401077 | -2.9084766 |
| KH.S115.2  | EVA1C                 | 1552.18126 | -0.28350369 | 0.09275643 | -3.0564317 |
| KH.C5.147  | MYO10_MYO7A_MYO7      | 1487.50579 | -0.28399621 | 0.09021119 | -3.1481264 |
| KH.C2.447  | HPDL                  | 1230.90587 | -0.2851092  | 0.09405721 | -3.0312318 |
| KH.S345.3  |                       | 9058.68666 | -0.28711135 | 0.065396   | -4.3903501 |
| KH.C2.473  | UXS1_TGDS             | 1504.07716 | -0.28723031 | 0.08647183 | -3.3216635 |
| KH.C7.61   |                       | 6028.77555 | -0.29372752 | 0.07312946 | -4.0165414 |
| KH.C9.157  |                       | 2666.06714 | -0.2954256  | 0.09137964 | -3.2329476 |
| KH.C1.182  |                       | 1340.99414 | -0.29696432 | 0.09783122 | -3.0354761 |
| KH.L116.70 | ARGI2_ARGI1           | 1689.6966  | -0.30237827 | 0.08738521 | -3.4602911 |
| KH.C3.72   | NOTC1_NOTC2_NOTC3     | 818.092137 | -0.3033243  | 0.10696526 | -2.8357272 |
| KH.C12.20  | CLIC6_CLIC1_CLIC4_CLI | 2946.30797 | -0.30439812 | 0.07575742 | -4.0180635 |
| KH.C11.389 | HMCN1_HMCN2_NPHN      | 3689.2815  | -0.30563669 | 0.08018546 | -3.8116221 |
| KH.L154.34 | ACTC_ACTB_ACTG_ACT    | 8389.08581 | -0.31419277 | 0.06270139 | -5.0109378 |



|            |                   |            |             |            |            |
|------------|-------------------|------------|-------------|------------|------------|
| KH.S494.4  | S26A5_S26A4_S26A6 | 953.684949 | -0.31531385 | 0.09899573 | -3.1851256 |
| KH.C2.187  | PAPS1_PAPS2       | 6346.39285 | -0.31649606 | 0.07541953 | -4.1964732 |
| KH.C4.467  | YLAT2_BAT1_XCT    | 1182.13213 | -0.318727   | 0.10794244 | -2.9527496 |
| KH.C9.132  | NOE2_NOE3_NOE1    | 943.690254 | -0.31980242 | 0.10671074 | -2.9969094 |
| KH.C5.398  |                   | 682.621197 | -0.3215272  | 0.11106216 | -2.8950203 |
| KH.S651.3  | MDR1_MDR3_ABCB5   | 2220.04184 | -0.32448282 | 0.07823709 | -4.1474296 |
| KH.C1.33   |                   | 698.060181 | -0.33163201 | 0.1156144  | -2.8684318 |
| KH.L71.9   | SOCS2_CISH_SOCS3  | 843.130879 | -0.33408012 | 0.10398272 | -3.2128427 |
| KH.C1.244  | CO4A1_CO4A6_CO4A2 | 21311.8856 | -0.33582    | 0.06247349 | -5.3754001 |
| KH.C12.118 | FXL20_FBXL2_FBXL4 | 1596.28467 | -0.34236176 | 0.0883274  | -3.8760538 |
| KH.L164.5  | NEO1_PRTG_DCC     | 3364.71337 | -0.3456463  | 0.08332351 | -4.1482447 |
| KH.C1.837  |                   | 761.432886 | -0.34687159 | 0.10714832 | -3.2373033 |
| KH.C10.190 | HMCN1_PRS33_KLKB1 | 1128.19652 | -0.3503102  | 0.1003885  | -3.4895451 |
| KH.L20.58  | EDIL3_DCBD2_DCBD1 | 973.394239 | -0.35163824 | 0.1060083  | -3.3170822 |
| KH.L116.14 | G3ST1_G3ST3_G3ST2 | 766.513437 | -0.35322416 | 0.1148358  | -3.0759063 |
| KH.C4.191  | SO1C1_SO1B1_SO2B1 | 1364.08264 | -0.354444   | 0.0935853  | -3.7873895 |
| KH.C3.684  |                   | 604.532678 | -0.35504382 | 0.12709744 | -2.7934774 |
| KH.C3.264  |                   | 1682.14151 | -0.3569493  | 0.08751434 | -4.0787523 |
| KH.C12.280 |                   | 1476.31956 | -0.35760425 | 0.09730087 | -3.6752422 |
| KH.C12.32  | TSN9_CD63_CD151   | 858.571609 | -0.35871001 | 0.10294505 | -3.4844803 |
| KH.C10.172 | KIRR2_KIRR1_KIRR3 | 536.393639 | -0.3603755  | 0.129148   | -2.7904071 |
| KH.C5.596  |                   | 1578.67368 | -0.36101986 | 0.1147986  | -3.1448108 |
| KH.C7.288  |                   | 1437.20091 | -0.36266602 | 0.0979456  | -3.7027292 |
| KH.L71.2   | FSCN1_FSCN2_FSCN3 | 2318.75638 | -0.37226605 | 0.07944401 | -4.6858918 |
| KH.C9.650  | ST1C2_ST1C3_ST1B1 | 559.100616 | -0.37252213 | 0.12188357 | -3.0563768 |
| KH.S1180.1 | GMPPB_GMPPA       | 3567.20147 | -0.37326015 | 0.07423922 | -5.0278027 |
| KH.C8.24   |                   | 1174.78992 | -0.375221   | 0.10008645 | -3.7489691 |
| KH.C4.260  |                   | 2451.04506 | -0.37526185 | 0.09065153 | -4.1396086 |
| KH.L37.43  | SRR               | 630.511417 | -0.37621582 | 0.13119973 | -2.8675046 |
| KH.L147.1  | NOTC1_NOTC2_NOTC3 | 8325.3393  | -0.37817713 | 0.08000703 | -4.7267986 |
| KH.C10.220 |                   | 448.074027 | -0.37935136 | 0.13444822 | -2.8215424 |
| KH.C8.101  | ROR2_ROR1_MUSK    | 782.401355 | -0.38856726 | 0.11487859 | -3.3824168 |
| KH.C13.105 | PLCH1_PLCH2_PLCD3 | 449.384144 | -0.38882501 | 0.13162335 | -2.9540732 |
| KH.L48.1   |                   | 3472.23175 | -0.38911792 | 0.08003501 | -4.8618462 |
| KH.C4.254  | AT8B2_AT8B4_AT8B1 | 1784.30269 | -0.39159798 | 0.089961   | -4.3529751 |
| KH.S546.3  |                   | 7295.76678 | -0.391974   | 0.0803317  | -4.8794433 |
| KH.C1.1258 | B3GT1_B3GT5_B3GT2 | 478.19848  | -0.39254103 | 0.13395133 | -2.9304751 |
| KH.C9.637  |                   | 885.354504 | -0.39310089 | 0.12065762 | -3.2579865 |
| KH.C1.23   | GRHL1_GRHL2_GRHL3 | 890.322872 | -0.39434635 | 0.10364006 | -3.8049605 |
| KH.C4.339  | MRP5_MRP9_ABCCB   | 1396.48796 | -0.39600383 | 0.08882589 | -4.4582029 |
| KH.C7.230  |                   | 1805.59218 | -0.39691071 | 0.0975509  | -4.0687552 |

|            |                     |            |             |            |            |
|------------|---------------------|------------|-------------|------------|------------|
| KH.C2.676  | JIP4_JIP3_ARHGH_ARH | 1024.07736 | -0.40305722 | 0.10834314 | -3.7201913 |
| KH.C12.191 | S23A2_S23A1_S23A3   | 438.715417 | -0.40578256 | 0.13735836 | -2.9541891 |
| KH.C3.191  | WBS27               | 377.494464 | -0.40984399 | 0.14441494 | -2.8379611 |
| KH.C5.154  | KLF2_KLF4_KLF1      | 659.42306  | -0.41062937 | 0.1473831  | -2.7861361 |
| KH.C9.859  | RAC1_RAC2_RAC3      | 356.559969 | -0.41139821 | 0.14550053 | -2.8274688 |
| KH.C7.501  |                     | 3592.04336 | -0.41486452 | 0.08744721 | -4.7441713 |
| KH.C1.1083 | EPHA4_EPHA7_EPHB2   | 1314.59877 | -0.41552413 | 0.09059699 | -4.5865113 |
| KH.C1.819  |                     | 1413.9308  | -0.41666239 | 0.08856567 | -4.7045586 |
| KH.C12.561 |                     | 603.553412 | -0.42130019 | 0.1264454  | -3.3318743 |
| KH.C10.551 |                     | 2016.07201 | -0.42179969 | 0.08223957 | -5.1289144 |
| KH.S403.4  | HEM1_KBL_HEMO_SPT   | 1998.21337 | -0.4229256  | 0.08063641 | -5.2448466 |
| KH.S651.1  |                     | 605.784842 | -0.42692868 | 0.11907113 | -3.5854928 |
| KH.C2.922  |                     | 2322.31202 | -0.42772101 | 0.09068941 | -4.716328  |
| KH.L73.2   | UROM_GP2_TECTA      | 1739.92663 | -0.4313477  | 0.11368685 | -3.794174  |
| KH.C8.611  |                     | 439.811623 | -0.43308241 | 0.15204496 | -2.8483839 |
| KH.L10.9   |                     | 631.989196 | -0.44118387 | 0.120352   | -3.6657792 |
| KH.C1.599  |                     | 1606.54364 | -0.44397567 | 0.09767556 | -4.545412  |
| KH.C8.741  |                     | 330.040716 | -0.45234155 | 0.15620791 | -2.895766  |
| KH.C2.133  | HMCN1               | 708.34926  | -0.45974041 | 0.11363484 | -4.0457698 |
| KH.C9.62   | ABRAL               | 550.375534 | -0.46139495 | 0.12477036 | -3.6979533 |
| KH.C13.17  |                     | 380.316871 | -0.46267589 | 0.15953512 | -2.9001507 |
| KH.S1042.1 |                     | 625.165407 | -0.46583977 | 0.1378519  | -3.379277  |
| KH.C10.251 |                     | 443.783202 | -0.46728708 | 0.14283369 | -3.2715468 |
| KH.C13.36  | RLBP1_TTPAL_CLVS1   | 773.912419 | -0.46835728 | 0.12637945 | -3.7059607 |
| KH.C12.49  | CO4A6_COLA1_CO9A2   | 1906.88411 | -0.46920539 | 0.09292633 | -5.0492188 |
| KH.C7.581  | B4GT1_B4GT2_B4GT4   | 902.30363  | -0.47305798 | 0.10429084 | -4.5359495 |
| KH.C13.87  | LRIG2_TPBG_LRIG1    | 1242.75152 | -0.47378742 | 0.0917915  | -5.1615612 |
| KH.C9.251  |                     | 4942.83852 | -0.47558289 | 0.07270624 | -6.5411563 |
| KH.C4.224  | CD166_BCAM_MUC18    | 26271.0144 | -0.47593971 | 0.0813199  | -5.8526846 |
| KH.C5.326  | FUT8                | 948.238557 | -0.47662854 | 0.10193992 | -4.6755828 |
| KH.C12.511 | FZD10_FZD4_FZD9     | 503.318733 | -0.47755589 | 0.14891596 | -3.2068818 |
| KH.C1.1121 | ST1C2_ST1C4_ST1E1   | 271.782707 | -0.47883832 | 0.16823832 | -2.8461906 |
| KH.C11.428 | LRP6_LRP4_LRP5      | 3009.42866 | -0.48631021 | 0.08798986 | -5.5268895 |
| KH.C1.429  | GPC5_GPC3_GPC4      | 1072.25719 | -0.48645613 | 0.10057841 | -4.836586  |
| KH.S655.3  |                     | 342.00934  | -0.48851385 | 0.14862806 | -3.2868211 |
| KH.C3.897  |                     | 294.624522 | -0.48856493 | 0.15828291 | -3.0866562 |
| KH.C5.367  |                     | 586.819156 | -0.49063693 | 0.12345303 | -3.9742804 |
| KH.C5.13   |                     | 1838.47591 | -0.49117142 | 0.08572103 | -5.7298823 |
| KH.L18.128 | MDGA1               | 1304.95211 | -0.4945807  | 0.09696057 | -5.1008438 |
| KH.C6.133  | ADK                 | 2518.90551 | -0.49959772 | 0.08996595 | -5.5531868 |
| KH.C14.474 |                     | 695.62752  | -0.50043437 | 0.12271085 | -4.0781591 |

|            |                       |            |             |            |            |
|------------|-----------------------|------------|-------------|------------|------------|
| KH.C9.565  | ANXA7_ANXA4_ANXA1     | 398.583123 | -0.50433125 | 0.14457096 | -3.4884687 |
| KH.S2051.1 | PXDN_PERT_PERE        | 437.660998 | -0.5059171  | 0.13487605 | -3.7509781 |
| KH.C1.802  | COCA1_COKA1_COEA1     | 1273.47143 | -0.508392   | 0.11563354 | -4.396579  |
| KH.C1.212  | D19L1_D19L2_D19L3     | 9724.04317 | -0.51318404 | 0.06791983 | -7.5557326 |
| KH.C2.229  |                       | 1042.34421 | -0.51549744 | 0.11331432 | -4.5492703 |
| KH.S164.12 | SOX14_SOX21_SOX2      | 429.245195 | -0.51607642 | 0.17187701 | -3.0025913 |
| KH.S164.28 | FUT6_FUT5_FUT7        | 778.613156 | -0.517916   | 0.12521481 | -4.1362198 |
| KH.S544.3  | DMTA2_DMRTA_DMR1      | 191.368727 | -0.52554601 | 0.1894922  | -2.7734441 |
| KH.C5.384  | TECTA_GP2             | 1907.24576 | -0.52795444 | 0.08824074 | -5.9831141 |
| KH.C7.261  | S6A17_S6A15_S6A19     | 2056.11711 | -0.5324224  | 0.08760336 | -6.0776481 |
| KH.C4.425  | RHAG_RHCG_RHBG        | 538.606074 | -0.53547108 | 0.12363363 | -4.331112  |
| KH.C1.825  | RXFP1_RXFP2_FSHR      | 196.558283 | -0.53878015 | 0.19393016 | -2.7782175 |
| KH.C11.518 | ABCG2_ABCG4_ABCG1     | 384.000492 | -0.53886196 | 0.15160517 | -3.5543773 |
| KH.S908.2  | TECTA_CILP2_CILP1     | 605.179627 | -0.539145   | 0.14568888 | -3.7006601 |
| KH.C4.201  |                       | 555.108327 | -0.54212469 | 0.14013931 | -3.8684697 |
| KH.C6.219  | FLRT1_FLRT2_FLRT3     | 785.916764 | -0.54337024 | 0.12030123 | -4.5167471 |
| KH.C1.1240 | KLH20_KLHL5_KLHL3     | 5129.38114 | -0.54343839 | 0.07645771 | -7.1076994 |
| KH.C8.863  | TRIM2_TRIM3_LIN41     | 1591.08148 | -0.54414806 | 0.1031884  | -5.2733455 |
| KH.C8.182  | B4GT1_B4GT2_B4GT4     | 4727.84642 | -0.54458764 | 0.07063835 | -7.7095181 |
| KH.C10.417 |                       | 741.744752 | -0.54503073 | 0.11381082 | -4.7889183 |
| KH.C5.16   | CD109_PZP_A2MG        | 12824.5747 | -0.54791686 | 0.06236152 | -8.7861371 |
| KH.C3.245  |                       | 1633.39067 | -0.54900797 | 0.09811635 | -5.5954791 |
| KH.C5.580  | FUT8                  | 1138.75802 | -0.55074074 | 0.09525538 | -5.7817285 |
| KH.L116.28 | UGPA                  | 16379.385  | -0.55140208 | 0.07396247 | -7.4551604 |
| KH.C11.663 | KREM1_KREM2           | 241.368252 | -0.55425577 | 0.17269592 | -3.2094317 |
| KH.L37.72  | CPMD8_PZP_A2MG        | 406.567655 | -0.55510441 | 0.13672567 | -4.0599867 |
| KH.C1.40   |                       | 789.116528 | -0.55528904 | 0.11373838 | -4.8821607 |
| KH.L149.2  |                       | 264.694993 | -0.55552425 | 0.17906491 | -3.1023625 |
| KH.C9.602  | GCYB1_GCYB2_GCYA2     | 714.678622 | -0.5559415  | 0.1189305  | -4.6745075 |
| KH.C8.115  |                       | 2116.21929 | -0.55703391 | 0.08535583 | -6.526021  |
| KH.C14.420 |                       | 337.383919 | -0.55749495 | 0.16336772 | -3.4125159 |
| KH.C12.536 |                       | 520.851805 | -0.55846769 | 0.14452673 | -3.8641134 |
| KH.S1524.1 |                       | 1171.49906 | -0.56011628 | 0.09695814 | -5.7768877 |
| KH.C2.248  | KLH26_KLH13_KLHL9     | 6067.07994 | -0.56051662 | 0.07078524 | -7.9185526 |
| KH.C13.184 | B3GT1_B3GT2_B3GN5     | 270.872971 | -0.5627853  | 0.16823684 | -3.3451965 |
| KH.C14.153 | PIM3_PIM1_PIM2        | 2667.41895 | -0.56562196 | 0.08458485 | -6.6870367 |
| KH.C9.561  | IKZF2_IKZF1_IKZF3_IKZ | 1554.76252 | -0.56567747 | 0.0952061  | -5.9416098 |
| KH.L153.79 | PITX2_PITX3_PITX1     | 752.606368 | -0.56604041 | 0.10969797 | -5.15999   |
| KH.L170.29 |                       | 339.295667 | -0.57122738 | 0.14958821 | -3.8186657 |
| KH.L18.100 |                       | 420.775106 | -0.57306986 | 0.14804402 | -3.8709423 |
| KH.L18.117 | PPA6                  | 450.572506 | -0.57367347 | 0.13374587 | -4.2892801 |

|            |                     |            |             |            |            |
|------------|---------------------|------------|-------------|------------|------------|
| KH.C2.992  |                     | 248.599367 | -0.57426353 | 0.17835297 | -3.2198148 |
| KH.L20.48  | SG196               | 276.416608 | -0.57636643 | 0.16864584 | -3.4176143 |
| KH.L106.16 | NODAL_BMP10_GDF2    | 328.156669 | -0.58242545 | 0.1659076  | -3.5105411 |
| KH.L171.4  | HMCN1_CORIN_PRS48   | 360.325223 | -0.58317045 | 0.15364647 | -3.7955342 |
| KH.C11.158 | FUT8                | 532.945305 | -0.58492883 | 0.12719041 | -4.5988437 |
| KH.C4.150  |                     | 468.742567 | -0.58720533 | 0.14543966 | -4.0374498 |
| KH.C11.489 | BAI3_HMCN1_SEM5B    | 2614.48798 | -0.59425261 | 0.08214162 | -7.234489  |
| KH.C6.115  | MCFD2               | 1255.27737 | -0.59714406 | 0.09809426 | -6.0874515 |
| KH.C4.341  | FOXB1_FOXB2_FOXA2   | 631.28581  | -0.60091662 | 0.12742835 | -4.7157216 |
| KH.C2.650  | FBN1_FBN3_FBN2      | 653.906969 | -0.6023697  | 0.11960596 | -5.0362852 |
| KH.C10.350 | UST_HS2ST           | 409.705649 | -0.60261278 | 0.15628236 | -3.8559232 |
| KH.C9.579  | WSCD2_WSCD1         | 358.41111  | -0.60378795 | 0.14983333 | -4.0297307 |
| KH.C10.147 | S22A5_S22A4_S22A3_S | 299.48253  | -0.60880118 | 0.16317622 | -3.7309429 |
| KH.C14.408 | CDX2_CDX1_CDX4      | 952.880629 | -0.6093453  | 0.10355885 | -5.8840485 |
| KH.C2.251  |                     | 585.09061  | -0.60938586 | 0.12841967 | -4.745269  |
| KH.C9.49   | RGS4_RGS5_RGS1      | 350.428758 | -0.61057906 | 0.17366721 | -3.5157994 |
| KH.C8.915  |                     | 2003.39792 | -0.61093321 | 0.08449274 | -7.2306002 |
| KH.C3.149  | PLS1_PLS3_PLS5      | 883.879326 | -0.61145244 | 0.1214867  | -5.0330814 |
| KH.C1.1018 |                     | 209.238719 | -0.61394283 | 0.20964599 | -2.928474  |
| KH.C11.394 |                     | 282.254196 | -0.61543894 | 0.17726152 | -3.4719265 |
| KH.C1.1100 | PCD18_PCD17_PCDGH   | 442.490931 | -0.6178272  | 0.13598894 | -4.5432164 |
| KH.C1.591  | S6A14_SC6A5_SC6A9   | 389.694306 | -0.61954736 | 0.15680054 | -3.9511813 |
| KH.C6.176  | NHRF3_NHRF4         | 357.397761 | -0.62166115 | 0.1781226  | -3.4900746 |
| KH.C8.747  | FOXI3_FOXI2_FOXI1   | 154.871325 | -0.62237095 | 0.22076755 | -2.8191233 |
| KH.C1.327  |                     | 634.246296 | -0.62355882 | 0.11984002 | -5.2032602 |
| KH.S779.1  | ACTA_ACTC_ACTS_ACT  | 195.602022 | -0.62637772 | 0.2103213  | -2.9781944 |
| KH.C1.922  | BARH1_TLX1_BARH2    | 295.110354 | -0.62671527 | 0.1626266  | -3.853707  |
| KH.C7.123  |                     | 870.836779 | -0.62719159 | 0.11310668 | -5.5451329 |
| KH.C7.154  | UXS1                | 8687.74311 | -0.63032193 | 0.08988323 | -7.0126757 |
| KH.C7.136  |                     | 361.083047 | -0.63073998 | 0.15849567 | -3.9795408 |
| KH.C7.211  |                     | 19262.4276 | -0.63155568 | 0.05907133 | -10.691408 |
| KH.C3.170  | FOXF1_FOXF2_FOXL1   | 897.716535 | -0.64197727 | 0.11818112 | -5.4321475 |
| KH.C9.40   |                     | 5484.80731 | -0.64259315 | 0.08182489 | -7.8532721 |
| KH.S803.3  | CO7A1_FINC          | 3264.07792 | -0.64278471 | 0.08380404 | -7.6700918 |
| KH.L19.6   | TSN33               | 4389.89882 | -0.64563551 | 0.07379473 | -8.7490734 |
| KH.C10.74  | AA1R_AA2AR_AA2BR    | 282.246531 | -0.64717553 | 0.19459734 | -3.3257163 |
| KH.C10.407 |                     | 630.00287  | -0.64928639 | 0.11877856 | -5.4663601 |
| KH.L10.31  |                     | 1515.37391 | -0.6573452  | 0.10990884 | -5.9808221 |
| KH.L152.12 | GAS2_GA2L3          | 149.064722 | -0.65740361 | 0.22229599 | -2.9573345 |
| KH.L63.13  | MZB1                | 731.831969 | -0.65766957 | 0.13184169 | -4.9883278 |
| KH.C12.650 |                     | 333.764974 | -0.6592659  | 0.16671646 | -3.9544141 |

|            |                     |            |             |            |            |
|------------|---------------------|------------|-------------|------------|------------|
| KH.C7.720  | PXDN_PXDNL_ISLR     | 142.10153  | -0.66019913 | 0.22586833 | -2.9229381 |
| KH.C8.489  |                     | 298.690945 | -0.66134427 | 0.16484846 | -4.0118317 |
| KH.C2.867  |                     | 140.338186 | -0.66457499 | 0.23261007 | -2.8570345 |
| KH.L116.32 | TSHR_RXFP1_LSHR     | 124.213517 | -0.66707064 | 0.23892917 | -2.7919179 |
| KH.C1.764  |                     | 396.098027 | -0.66733229 | 0.14033515 | -4.7552756 |
| KH.S164.31 | FUT6_FUT5_FUT4      | 130.627929 | -0.66862943 | 0.22920034 | -2.9172271 |
| KH.C5.330  |                     | 651.417103 | -0.6690719  | 0.13563036 | -4.9330541 |
| KH.C12.9   | UN93A_UN93B         | 448.279236 | -0.67289528 | 0.14145106 | -4.757089  |
| KH.C3.718  |                     | 736.681218 | -0.67533506 | 0.13654333 | -4.9459394 |
| KH.S417.3  | G3ST1_G3ST3         | 220.648995 | -0.67570343 | 0.19210718 | -3.5173252 |
| KH.C14.414 | PIM3_PIM1_PIM2      | 2321.76777 | -0.67573844 | 0.09453142 | -7.1482945 |
| KH.L18.33  | ZN420_ZN135_ZN251   | 419.181776 | -0.67680822 | 0.13881696 | -4.8755443 |
| KH.C9.445  | ENDOU               | 441.218059 | -0.67957125 | 0.15430711 | -4.4040177 |
| KH.C14.446 |                     | 1878.5043  | -0.6797389  | 0.10490771 | -6.4793988 |
| KH.C14.271 |                     | 361.403611 | -0.69012674 | 0.14963329 | -4.6121203 |
| KH.C1.188  |                     | 52195.63   | -0.69018776 | 0.09687999 | -7.1241518 |
| KH.L50.21  | GXLT2_GXLT1         | 311.970952 | -0.69173417 | 0.16444467 | -4.2064858 |
| KH.C3.666  | PDE9A_PDE11_PDE4C   | 278.984974 | -0.69195206 | 0.17226188 | -4.0168613 |
| KH.S164.10 |                     | 347.669647 | -0.69677702 | 0.15208625 | -4.5814596 |
| KH.C2.411  |                     | 164.70552  | -0.70021514 | 0.22308651 | -3.1387605 |
| KH.C3.411  | LFTY2_LFTY1_BMP4    | 467.066372 | -0.70073284 | 0.14199848 | -4.9347912 |
| KH.C7.281  | SC6A5_SC6A7_SC6A9   | 5319.59492 | -0.70623858 | 0.06902165 | -10.232132 |
| KH.L96.43  | TM11D_TMPS3_ACRO_   | 285.493199 | -0.70780676 | 0.20653412 | -3.4270695 |
| KH.C11.199 | ODC_TXTP_UCP5       | 978.734196 | -0.70886304 | 0.0994809  | -7.1256196 |
| KH.S761.3  | S38A4_S38A3_S38A2_9 | 266.788013 | -0.70995902 | 0.16782527 | -4.2303464 |
| KH.C2.649  |                     | 476.426693 | -0.71164631 | 0.15113581 | -4.7086546 |
| KH.S870.2  | GIN1_NYNRI_RTL1     | 1521.76637 | -0.71222556 | 0.10579197 | -6.7323217 |
| KH.C7.64   | GCYB1_GCYB2_GCYA2_  | 921.201135 | -0.71344484 | 0.10573886 | -6.7472341 |
| KH.C1.870  | S6A14_SC6A5_SC6A7   | 2206.47764 | -0.71420793 | 0.08402974 | -8.4994663 |
| KH.C1.495  | PLMN_KLKB1_CTRL     | 711.30736  | -0.71528373 | 0.14926177 | -4.7921429 |
| KH.C1.1093 |                     | 3145.67314 | -0.71599212 | 0.08564239 | -8.3602537 |
| KH.C7.43   | AP2E_AP2A_AP2B      | 617.131501 | -0.71615532 | 0.13468416 | -5.3172945 |
| KH.C11.711 |                     | 780.383529 | -0.71626236 | 0.11004475 | -6.5088283 |
| KH.C3.231  |                     | 127.060411 | -0.71999122 | 0.25010853 | -2.8787151 |
| KH.C3.503  | PLEC_DESP_EPIPL     | 3743.55784 | -0.72377442 | 0.08637078 | -8.3798527 |
| KH.L63.14  |                     | 245.611036 | -0.72437    | 0.1844992  | -3.9261418 |
| KH.C2.201  |                     | 133.756885 | -0.72641504 | 0.23264093 | -3.122473  |
| KH.C1.1252 |                     | 392.536145 | -0.72735098 | 0.14341534 | -5.0716402 |
| KH.S1721.1 | TTC22               | 398.351484 | -0.72740176 | 0.16630739 | -4.373839  |
| KH.C2.20   |                     | 5100.0007  | -0.72967563 | 0.0842503  | -8.660808  |
| KH.C11.308 |                     | 162.062286 | -0.73144794 | 0.21352396 | -3.4256012 |

|            |                      |            |             |            |            |
|------------|----------------------|------------|-------------|------------|------------|
| KH.C9.3    | TECTA_UROM_GP2       | 7859.15157 | -0.73292157 | 0.08605726 | -8.5166731 |
| KH.L8.1    | ESRP1_ESRP2_HNRH2    | 1763.5992  | -0.73368918 | 0.09854491 | -7.4452265 |
| KH.L37.12  |                      | 921.936343 | -0.73588989 | 0.11280186 | -6.5237392 |
| KH.C2.655  | TMTC3_TMTC4_TMTC1    | 767.918563 | -0.73608851 | 0.11079401 | -6.6437574 |
| KH.C10.496 | HMCN1_PRS33_PRS38    | 1276.63205 | -0.73927661 | 0.09281715 | -7.9648707 |
| KH.S1155.2 |                      | 1123.83026 | -0.74428469 | 0.10691264 | -6.9616154 |
| KH.C1.1109 |                      | 2519.59059 | -0.7495165  | 0.24784008 | -3.0241941 |
| KH.C14.146 | GAPR1                | 198.315058 | -0.75005466 | 0.21074547 | -3.5590548 |
| KH.C8.176  |                      | 1813.68275 | -0.75389748 | 0.08587831 | -8.7786717 |
| KH.L116.41 |                      | 234.425977 | -0.75921808 | 0.18623582 | -4.0766491 |
| KH.C9.625  |                      | 96.8903344 | -0.76268831 | 0.26908628 | -2.8343635 |
| KH.S2649.1 | ANPRC                | 95.643201  | -0.76467767 | 0.27270933 | -2.8040026 |
| KH.L63.12  |                      | 791.27957  | -0.76600456 | 0.12700772 | -6.0311652 |
| KH.C8.918  |                      | 189.518953 | -0.76881625 | 0.22562061 | -3.4075622 |
| KH.L5.10   | TM175                | 191.192494 | -0.77026152 | 0.21457678 | -3.5896778 |
| KH.L147.25 | CSMD1_SVEP1_CR1      | 14897.8946 | -0.77178992 | 0.17804231 | -4.334868  |
| KH.C2.609  |                      | 401.259098 | -0.77450056 | 0.14735017 | -5.2561905 |
| KH.C10.367 | SIX3_SIX6_SIX1       | 99.4491009 | -0.77511583 | 0.26737303 | -2.8990053 |
| KH.C13.119 | CAH14_CAH9_CAH6      | 3926.21724 | -0.77572899 | 0.08440834 | -9.1901936 |
| KH.C7.210  | NHRF3_PDZ1P_NHRF2    | 1037.03831 | -0.77630399 | 0.09778263 | -7.9390785 |
| KH.C1.60   |                      | 236.622565 | -0.77661274 | 0.21011827 | -3.6960743 |
| KH.C12.390 | MRF_MRFL             | 1147.22201 | -0.7773764  | 0.1007618  | -7.7149915 |
| KH.C14.154 |                      | 1819.34658 | -0.78211307 | 0.08631573 | -9.0610719 |
| KH.C7.542  | RFNG_LFNG_MFNG       | 301.420334 | -0.78270689 | 0.17726493 | -4.4154639 |
| KH.L106.9  |                      | 881.689563 | -0.78310784 | 0.12936406 | -6.0535193 |
| KH.C5.346  | DDC_DCHS_GADL1       | 476.112693 | -0.78638191 | 0.13676807 | -5.7497478 |
| KH.C5.27   | FUT6_FUT5_FUT3       | 164.505295 | -0.78979322 | 0.21368815 | -3.6960086 |
| KH.L73.8   | S39AA_S39AC_S39A4    | 196.232662 | -0.79285663 | 0.19263164 | -4.1159212 |
| KH.C11.722 |                      | 167.143704 | -0.79288644 | 0.20825994 | -3.8071962 |
| KH.L59.3   | GLIP1_GPRL1_PI16_CRI | 309.675743 | -0.79551735 | 0.17231254 | -4.6167118 |
| KH.C9.204  | GMPPB_GMPPA          | 3290.19754 | -0.7983809  | 0.09776513 | -8.1663154 |
| KH.C2.453  | KGP1_KGP2_PRKX       | 608.479115 | -0.80333472 | 0.14933945 | -5.3792531 |
| KH.C5.519  | B4GT7                | 313.189669 | -0.80338287 | 0.18154789 | -4.4251842 |
| KH.C14.56  | BAI3_HMCN1_AGRB2     | 7417.8751  | -0.80779915 | 0.07689508 | -10.505212 |
| KH.C12.408 | MGT5A_MGT5B          | 682.057294 | -0.81225066 | 0.12828576 | -6.3315728 |
| KH.L168.1  |                      | 279.61879  | -0.81554498 | 0.19025673 | -4.28655   |
| KH.C5.385  |                      | 1247.90143 | -0.81610534 | 0.12378339 | -6.5930117 |
| KH.C5.52   | CAHM2_FA26E_FA26F    | 1595.47464 | -0.81858407 | 0.09305262 | -8.7970016 |
| KH.C6.12   |                      | 4284.71852 | -0.81878179 | 0.08679927 | -9.4330491 |
| KH.C3.762  |                      | 245.630775 | -0.82183699 | 0.18559006 | -4.4282382 |
| KH.C4.71   | HS3S1_NDST2_NDST4    | 1274.12451 | -0.82420941 | 0.11986061 | -6.8763992 |

|             |                   |            |             |            |            |
|-------------|-------------------|------------|-------------|------------|------------|
| KH.L36.8    | HMCN1_SEM5B_SEM5  | 6600.23587 | -0.82459352 | 0.07350545 | -11.218128 |
| KH.C1.201   | MOT14_MOT9_MOT12  | 308.865387 | -0.82705934 | 0.16898468 | -4.894286  |
| KH.C3.781   | VIME_GFAP_NFM     | 3162.70822 | -0.82946704 | 0.10105335 | -8.2082091 |
| KH.C12.544  | B3GT1_B3GT5_B3GT2 | 229.287661 | -0.83222627 | 0.18458267 | -4.5086913 |
| KH.L96.103  |                   | 1253.25297 | -0.83422699 | 0.11307992 | -7.3773223 |
| KH.C14.535  |                   | 1462.85922 | -0.84004673 | 0.1061894  | -7.9108339 |
| KH.C2.125   | FGF9_FGF20_FGF16  | 375.631312 | -0.84372363 | 0.17299147 | -4.8772556 |
| KH.C5.240   | LRP6_LRP4_LRP1    | 13938.3391 | -0.85004507 | 0.07667526 | -11.086302 |
| KH.S2590.2  |                   | 84.7322788 | -0.85078581 | 0.28163003 | -3.0209342 |
| KH.C3.304   | RGS4_RGS8_RGS5    | 403.48217  | -0.85083105 | 0.15400765 | -5.5246025 |
| KH.L141.68  |                   | 1981.50117 | -0.85339728 | 0.25082384 | -3.4023771 |
| KH.C4.648   | RHAG_RHCG_RHBG    | 387.9989   | -0.85514417 | 0.16939646 | -5.0481821 |
| KH.C8.475   | SO1B3_SO1C1_SO1B1 | 329.905856 | -0.85628979 | 0.17060095 | -5.0192556 |
| KH.S1391.3  |                   | 1039.23217 | -0.8599447  | 0.28815382 | -2.9843252 |
| KH.L153.109 |                   | 115.904194 | -0.86364906 | 0.25981992 | -3.3240294 |
| KH.L119.31  | PLEC_DESP_EPIPL   | 114.840228 | -0.86434482 | 0.27441067 | -3.1498222 |
| KH.C2.380   | LARP6             | 1334.91876 | -0.86529864 | 0.11592763 | -7.4641275 |
| KH.C2.594   |                   | 2018.1005  | -0.86769137 | 0.27383947 | -3.1686132 |
| KH.S1248.1  |                   | 68.4424675 | -0.86944137 | 0.31348966 | -2.7734292 |
| KH.C3.305   |                   | 1669.67688 | -0.87402088 | 0.0916869  | -9.5326696 |
| KH.C11.279  | CHSTB             | 95.2037373 | -0.87470505 | 0.28610469 | -3.0572902 |
| KH.C11.299  | FUT8              | 2264.11733 | -0.87488857 | 0.10886312 | -8.0365927 |
| KH.S345.8   |                   | 123.359829 | -0.87743861 | 0.25520264 | -3.4382035 |
| KH.C2.373   |                   | 591.43039  | -0.88082511 | 0.14720306 | -5.9837419 |
| KH.C2.696   | CHSTB             | 905.429225 | -0.88193673 | 0.30376596 | -2.9033429 |
| KH.L108.10  | KLH13_KLHL9_KLH36 | 5872.14322 | -0.88244896 | 0.08807314 | -10.019502 |
| KH.L97.7    | ACM3_ACM2_ACM5    | 201.712859 | -0.88739778 | 0.20135495 | -4.4071316 |
| KH.S1957.1  | GMPPB             | 397.622819 | -0.88869221 | 0.17030574 | -5.2182164 |
| KH.C12.146  |                   | 219.118045 | -0.88981697 | 0.19738755 | -4.507969  |
| KH.C5.537   | CHST1_CHST3_CHST6 | 198.451731 | -0.89129425 | 0.2014013  | -4.4254643 |
| KH.S389.10  |                   | 259.738086 | -0.8914228  | 0.19644886 | -4.5376838 |
| KH.L40.18   | ZF69B_ZSA5D_ZN713 | 391.714968 | -0.89809055 | 0.15520157 | -5.7866073 |
| KH.C13.146  | HMCN1_SEM5B_ATS9  | 513.528578 | -0.89979053 | 0.12841031 | -7.0071519 |
| KH.S423.1   | ANPRA_ANPRB_ANPRC | 836.290356 | -0.90160727 | 0.1341661  | -6.7200828 |
| KH.S406.9   | ARI3B_ARI3A_ARI3C | 6843.18382 | -0.90625447 | 0.18078385 | -5.0129172 |
| KH.C9.656   |                   | 472.018863 | -0.90716734 | 0.16490172 | -5.5012605 |
| KH.C8.844   |                   | 1321.07312 | -0.90835939 | 0.10488135 | -8.6608284 |
| KH.S1641.1  |                   | 530.173805 | -0.91141116 | 0.16091918 | -5.663782  |
| KH.C2.694   | UROM_GP2          | 1826.19444 | -0.91203751 | 0.10950967 | -8.3283745 |
| KH.L168.6   |                   | 665.386911 | -0.91398748 | 0.13189249 | -6.9297917 |
| KH.C8.117   |                   | 1452.4396  | -0.91543746 | 0.11557366 | -7.920814  |

|            |                     |            |             |            |            |
|------------|---------------------|------------|-------------|------------|------------|
| KH.S390.3  | KCD15_KCTD1         | 200.484165 | -0.91623017 | 0.20628811 | -4.4415073 |
| KH.C9.543  | VIME_GFAP_PERI_DESI | 2769.53402 | -0.91855635 | 0.0851695  | -10.785038 |
| KH.L141.32 |                     | 975.049632 | -0.92323807 | 0.25492797 | -3.6215645 |
| KH.L132.16 | MATN3_MATN2_MATN    | 117688.549 | -0.92447425 | 0.07680084 | -12.037294 |
| KH.S1783.2 |                     | 445.905295 | -0.92469761 | 0.16656772 | -5.5514815 |
| KH.C10.127 | HMCN1_TMPS6_FA9     | 609.6462   | -0.92603494 | 0.13502683 | -6.858155  |
| KH.C14.293 | COCA1_MATN2_MATN    | 15952.1527 | -0.9275648  | 0.19346539 | -4.794474  |
| KH.C2.637  | B3GT1_B3GT5_B3GN5   | 618.769436 | -0.92890656 | 0.27883635 | -3.3313683 |
| KH.L5.14   | B4GT1_B4GT2_B4GT4   | 2674.0992  | -0.93479453 | 0.0956112  | -9.7770401 |
| KH.L45.4   |                     | 76.0656094 | -0.93840797 | 0.29695203 | -3.1601332 |
| KH.S345.1  |                     | 3772.36611 | -0.94001009 | 0.2487724  | -3.7785948 |
| KH.C11.454 |                     | 2172.06464 | -0.94331459 | 0.26943247 | -3.501117  |
| KH.C6.198  | HMCN1_TSP1_AGRB2    | 22791.9406 | -0.94421388 | 0.19124392 | -4.9372231 |
| KH.C8.395  |                     | 685.703551 | -0.94429174 | 0.13781764 | -6.8517479 |
| KH.C1.93   |                     | 1351.82005 | -0.94511309 | 0.10484914 | -9.0140282 |
| KH.C14.163 |                     | 641.528546 | -0.9475534  | 0.13386759 | -7.0782885 |
| KH.C7.164  | CSMD3_SVEP1_CR2_CS  | 34857.3379 | -0.95270661 | 0.08357112 | -11.399951 |
| KH.C2.244  |                     | 958.807672 | -0.95542729 | 0.11948153 | -7.9964436 |
| KH.C3.650  |                     | 111.677395 | -0.96019346 | 0.25811926 | -3.7199606 |
| KH.C1.747  | S22A5_S22A4_S22AG   | 869.472055 | -0.96484779 | 0.13340443 | -7.2325019 |
| KH.C2.802  |                     | 367.972554 | -0.96634492 | 0.18254339 | -5.2937821 |
| KH.L95.5   |                     | 3716.65903 | -0.97291132 | 0.30611156 | -3.1782901 |
| KH.L131.17 |                     | 382.620509 | -0.97887855 | 0.14991043 | -6.5297563 |
| KH.L4.50   |                     | 181.391228 | -0.98097873 | 0.20206077 | -4.8548697 |
| KH.C11.512 | LYAM3_SVEP1_LYAM2   | 1201.25651 | -0.98801834 | 0.09881709 | -9.9984559 |
| KH.C13.16  | HMCN1_PROP_AGRB2    | 5415.57852 | -0.99518569 | 0.19625764 | -5.0708125 |
| KH.C1.602  |                     | 193.010512 | -0.99896269 | 0.2308379  | -4.3275505 |
| KH.C5.531  | S35E3               | 370.498799 | -1.01779798 | 0.16395451 | -6.2078071 |
| KH.C3.251  |                     | 597.209644 | -1.01831716 | 0.1357134  | -7.5034385 |
| KH.L171.19 |                     | 424.519459 | -1.02143052 | 0.15063477 | -6.7808417 |
| KH.C11.222 |                     | 1292.5786  | -1.02798055 | 0.26119701 | -3.9356521 |
| KH.C9.147  |                     | 45811.1622 | -1.02924818 | 0.17045429 | -6.0382652 |
| KH.C14.337 |                     | 56166.3378 | -1.04355923 | 0.2616372  | -3.9885737 |
| KH.C5.235  |                     | 2608.33619 | -1.045498   | 0.09661369 | -10.821428 |
| KH.L141.61 |                     | 1357.56726 | -1.05110121 | 0.11381052 | -9.2355368 |
| KH.C4.247  |                     | 308.691438 | -1.05294254 | 0.37719012 | -2.7915432 |
| KH.C2.377  | TMPS9_PRSS8_KLK5    | 934.612353 | -1.05441968 | 0.10929301 | -9.6476407 |
| KH.C8.121  | HMCN1_SSPO_ATS9_SI  | 117800.792 | -1.05446844 | 0.08022143 | -13.144474 |
| KH.C13.90  | ANPRA_ANPRB_GUC2C   | 273.709723 | -1.0566627  | 0.19948375 | -5.2969863 |
| KH.C8.164  |                     | 1569.9768  | -1.05944926 | 0.32360485 | -3.273898  |
| KH.C14.356 |                     | 130269.072 | -1.05967279 | 0.24381105 | -4.346287  |



|             |                     |            |             |            |            |
|-------------|---------------------|------------|-------------|------------|------------|
| KH.C5.37    |                     | 653.111301 | -1.06012252 | 0.12006152 | -8.829828  |
| KH.C9.652   | OSR2_OS1_ZKSC1      | 52.1697078 | -1.06493557 | 0.37606187 | -2.8318095 |
| KH.C3.611   |                     | 3780.94822 | -1.07202795 | 0.22887943 | -4.6838108 |
| KH.L132.4   | MEGF6_FBN1_MATN2    | 6797.96807 | -1.07215332 | 0.06933049 | -15.464384 |
| KH.L84.20   | S22A5_S22A4_S22A3   | 138.796644 | -1.07552083 | 0.23769021 | -4.5248848 |
| KH.L116.100 | LGR5_LRIG3_LRIG2_TR | 785.142485 | -1.07638247 | 0.12798609 | -8.4101522 |
| KH.L147.16  |                     | 626.231608 | -1.07682574 | 0.13137659 | -8.1964812 |
| KH.C11.293  |                     | 8229.4589  | -1.0774256  | 0.07242646 | -14.876132 |
| KH.C11.539  | S20A1_S20A2         | 123.151226 | -1.08003099 | 0.26286086 | -4.1087555 |
| KH.C1.1013  |                     | 308.100523 | -1.08053424 | 0.17386109 | -6.2149285 |
| KH.C10.506  |                     | 153.564674 | -1.08201337 | 0.25172521 | -4.2983909 |
| KH.L96.44   |                     | 3008.58051 | -1.08233497 | 0.08907026 | -12.151475 |
| KH.C3.654   |                     | 194.199873 | -1.08241253 | 0.19896448 | -5.44023   |
| KH.C9.803   |                     | 125.13198  | -1.08341127 | 0.26467063 | -4.0934322 |
| KH.C5.21    |                     | 2879.55204 | -1.08356047 | 0.09957109 | -10.88228  |
| KH.C14.54   |                     | 310.072706 | -1.08455439 | 0.17785777 | -6.0978746 |
| KH.L4.7     |                     | 132.721751 | -1.08824223 | 0.24161245 | -4.5040819 |
| KH.C3.438   | LYAM3_CSMD3_LYAM2   | 2528.66057 | -1.09371873 | 0.10254197 | -10.666059 |
| KH.C14.549  |                     | 58093.2463 | -1.09837686 | 0.38962337 | -2.8190733 |
| KH.C1.525   |                     | 959.573193 | -1.10796014 | 0.11777849 | -9.4071518 |
| KH.C11.184  | GALE_TGDS           | 1712.11185 | -1.10951953 | 0.33934707 | -3.2695716 |
| KH.C14.577  |                     | 74.8383964 | -1.12182594 | 0.3203926  | -3.5014102 |
| KH.C1.158   | GSH1                | 48.2689359 | -1.13563125 | 0.3838014  | -2.9589034 |
| KH.C2.919   | BTBDJ_BTBD3_BTBD6   | 1527.13479 | -1.13620616 | 0.28704447 | -3.9582931 |
| KH.S351.4   | PLEC_DESP_EPIPL     | 1471.50684 | -1.13820391 | 0.11462234 | -9.9300356 |
| KH.C14.261  |                     | 66910.4143 | -1.13962514 | 0.19889683 | -5.7297299 |
| KH.C7.521   | PLMN_APOA_TPA       | 415.469405 | -1.14713662 | 0.17285127 | -6.6365529 |
| KH.C1.757   |                     | 420.328245 | -1.15448388 | 0.13826968 | -8.3495083 |
| KH.C1.434   | B3GT5_B3GT2_YI036   | 288.447295 | -1.15942442 | 0.1763723  | -6.5737331 |
| KH.C2.54    |                     | 252.856603 | -1.17347278 | 0.18357668 | -6.3922759 |
| KH.C7.58    | TMPS9_TMPS5_BSSP4   | 5158.8596  | -1.18410443 | 0.07029801 | -16.844067 |
| KH.C9.572   |                     | 1135.32227 | -1.19045735 | 0.28067152 | -4.2414612 |
| KH.C9.209   | NR4A3_NR4A2_NR4A1   | 2436.29075 | -1.19726648 | 0.09105779 | -13.148425 |
| KH.S511.1   |                     | 202.805976 | -1.20168528 | 0.19251411 | -6.2420634 |
| KH.C8.49    | FOXI3_FOXI2_FOXI1   | 41.7642879 | -1.2069976  | 0.41928123 | -2.8787303 |
| KH.C5.208   |                     | 849.658355 | -1.21204723 | 0.13535152 | -8.9548108 |
| KH.C12.186  |                     | 45.7867873 | -1.21649518 | 0.38054677 | -3.1967035 |
| KH.L96.108  | YLAT2_BAT1_YLAT1    | 701.068768 | -1.21689596 | 0.14686038 | -8.2860742 |
| KH.C10.215  |                     | 56.8977988 | -1.23124943 | 0.39700405 | -3.1013523 |
| KH.C10.144  | CORIN_TMPS2_FA11    | 12285.2408 | -1.23614927 | 0.19597108 | -6.3078146 |
| KH.C10.67   |                     | 579.996696 | -1.23965963 | 0.12557682 | -9.8717236 |

|            |                  |            |             |            |            |
|------------|------------------|------------|-------------|------------|------------|
| KH.L142.14 | EMX1_EMX2_VAX1   | 173.886795 | -1.25421189 | 0.20590166 | -6.091315  |
| KH.L108.30 |                  | 2145.64379 | -1.26997683 | 0.29845542 | -4.2551643 |
| KH.C7.354  |                  | 252.894541 | -1.3023966  | 0.17669087 | -7.3710466 |
| KH.C8.603  |                  | 6806.87372 | -1.3329345  | 0.38380306 | -3.4729648 |
| KH.L170.71 | AQP8_AQP1        | 64.4812372 | -1.33540326 | 0.42293851 | -3.1574407 |
| KH.C8.510  | MATN1_HMCN1_CO6A | 66088.2552 | -1.33565752 | 0.07980282 | -16.736973 |
| KH.C1.611  | FCL              | 20422.8745 | -1.3411764  | 0.36073519 | -3.7178974 |
| KH.C8.433  | FAT1_SNED1_DLL1  | 9166.25522 | -1.34231614 | 0.07346451 | -18.271628 |
| KH.C14.201 | MDGA1_ENTK_MALR1 | 6365.22683 | -1.34891477 | 0.4659484  | -2.8949875 |
| KH.L164.4  |                  | 1439.67663 | -1.35345715 | 0.23758289 | -5.6967788 |
| KH.C2.809  |                  | 35.9052785 | -1.35800477 | 0.45732475 | -2.9694539 |
| KH.C4.146  | CTRB2_CTRB1_CTRL | 3053.69434 | -1.38046719 | 0.41147602 | -3.3549153 |
| KH.L92.8   |                  | 5228.83134 | -1.40133572 | 0.23667264 | -5.9209875 |
| KH.C3.764  |                  | 204.504685 | -1.40628812 | 0.2438648  | -5.7666712 |
| KH.L22.52  |                  | 51.6869672 | -1.42927129 | 0.38688666 | -3.6942894 |
| KH.C8.877  |                  | 866.728176 | -1.47209271 | 0.48422348 | -3.0401102 |
| KH.C1.3    |                  | 22.7337867 | -2.54872842 | 0.75555878 | -3.3733026 |
| KH.S432.1  |                  | 20.6493634 | -3.79269458 | 0.76530097 | -4.9558209 |
| KH.L60.8   |                  | 9.35661452 | -3.98277214 | 1.18559537 | -3.3593014 |

| pvalue     | padj       | HMX1_FPKM  | HMX2_FPKM | HMX3_FPKM  | YFP1_FPKM | YFP2_FPKM |
|------------|------------|------------|-----------|------------|-----------|-----------|
| 2.78E-27   | 1.13E-24   | 93.611351  | 140.1987  | 230.916519 | 1.116467  | 0.717605  |
| 2.13E-49   | 1.91E-46   | 9.999525   | 6.820874  | 1.516103   | 0.694664  | 0.431057  |
| 2.40E-77   | 7.55E-74   | 32.429367  | 23.087103 | 7.054599   | 3.010319  | 2.164255  |
| 4.12E-07   | 2.13E-05   | 0.998651   | 0.741074  | 0.278904   | 0.06845   | 0         |
| 5.72E-18   | 1.03E-15   | 8.624603   | 3.492775  | 1.979976   | 0.808223  | 0.330755  |
| 0.00200558 | 0.04274254 | 1.476188   | 0.710602  | 0.321064   | 0.670032  | 0.041831  |
| 0.00562139 | 0.09885787 | 1.082726   | 0.037124  | 0.353397   | 0.056422  | 0.022752  |
| 2.57E-83   | 1.08E-79   | 23.237993  | 16.318871 | 8.794868   | 3.712085  | 2.700893  |
| 1.37E-83   | 8.62E-80   | 35.127125  | 36.399132 | 15.149598  | 6.198422  | 4.125287  |
| 7.00E-14   | 8.55E-12   | 11.460532  | 6.894696  | 3.626407   | 3.519809  | 0.534664  |
| 1.97E-12   | 2.08E-10   | 29.38908   | 17.905813 | 5.189749   | 4.571681  | 2.699611  |
| 3.62E-35   | 2.27E-32   | 34.631416  | 25.26145  | 12.808995  | 4.981874  | 5.554678  |
| 1.48E-70   | 3.10E-67   | 70.488518  | 62.183819 | 22.195433  | 14.186757 | 10.951782 |
| 1.39E-09   | 1.02E-07   | 85.748589  | 66.700394 | 37.506603  | 14.159166 | 9.363735  |
| 0.00467899 | 0.08612287 | 1.617905   | 2.615882  | 2.119695   | 0.640622  | 1.429368  |
| 7.53E-12   | 7.23E-10   | 15.193546  | 9.001363  | 4.523129   | 3.088667  | 2.830458  |
| 8.24E-05   | 0.00259727 | 0.002562   | 0.033457  | 0.063777   | 0.089691  | 0.099146  |
| 4.66E-10   | 3.69E-08   | 4.276917   | 4.033607  | 0.991244   | 0.333707  | 1.10015   |
| 1.53E-12   | 1.63E-10   | 13.519933  | 4.821785  | 3.840111   | 1.620687  | 0.734456  |
| 1.45E-53   | 1.52E-50   | 41.635834  | 28.140413 | 13.563532  | 9.801622  | 6.32404   |
| 5.08E-56   | 6.39E-53   | 25.810089  | 22.473854 | 8.855103   | 6.501969  | 4.681641  |
| 0.00202011 | 0.04292156 | 0.960213   | 0.912776  | 0.585577   | 0.080781  | 0         |
| 9.58E-141  | 1.20E-136  | 146.218048 | 78.651176 | 70.533813  | 34.650299 | 21.706085 |
| 1.61E-14   | 2.09E-12   | 11.445273  | 6.290527  | 2.526472   | 2.771409  | 1.952114  |
| 5.90E-18   | 1.04E-15   | 7.282439   | 8.71025   | 3.452538   | 2.086849  | 2.005735  |
| 0.00490372 | 0.08897463 | 2.491346   | 3.178197  | 1.048468   | 0.563212  | 0.291837  |
| 3.64E-11   | 3.27E-09   | 3.735179   | 2.333178  | 0.92341    | 0.776638  | 0.665744  |
| 2.14E-17   | 3.64E-15   | 9.091327   | 10.020809 | 4.180684   | 3.539109  | 2.290812  |
| 5.84E-05   | 0.00189768 | 1.983297   | 1.117286  | 1.035739   | 0.437127  | 0.435146  |
| 9.07E-07   | 4.40E-05   | 2.642241   | 1.783662  | 1.034685   | 0.428457  | 0.971144  |
| 8.04E-66   | 1.44E-62   | 39.357697  | 28.734015 | 16.122091  | 12.875451 | 8.255448  |
| 3.33E-29   | 1.55E-26   | 19.14942   | 7.669774  | 10.429389  | 6.606171  | 1.883669  |
| 1.42E-08   | 8.94E-07   | 7.79444    | 5.76197   | 1.331138   | 1.84269   | 1.893326  |
| 8.15E-13   | 9.15E-11   | 22.266033  | 6.225627  | 11.344992  | 6.944291  | 1.420573  |
| 1.60E-38   | 1.06E-35   | 99.455856  | 70.413017 | 35.747364  | 37.2477   | 18.205311 |
| 3.09E-32   | 1.69E-29   | 75.498589  | 51.770168 | 39.334446  | 21.662611 | 16.244101 |
| 0.00010645 | 0.00328867 | 3.12196    | 1.318381  | 0.983254   | 1.154117  | 0.593139  |
| 0.00031468 | 0.00860173 | 3.169053   | 2.511282  | 2.487755   | 0.994869  | 1.409348  |
| 8.29E-23   | 2.43E-20   | 20.411016  | 9.949061  | 6.613914   | 6.763175  | 3.224241  |
| 3.63E-24   | 1.23E-21   | 34.487988  | 19.104334 | 10.537834  | 10.051673 | 7.079596  |

|            |            |            |            |            |            |            |
|------------|------------|------------|------------|------------|------------|------------|
| 4.61E-19   | 9.99E-17   | 377.501404 | 271.611603 | 136.450912 | 140.105087 | 96.991257  |
| 6.79E-45   | 5.69E-42   | 50.198483  | 38.917374  | 19.468248  | 17.36202   | 12.448538  |
| 2.83E-05   | 0.00099123 | 4.231204   | 2.120703   | 2.677991   | 1.207855   | 0.651437   |
| 2.31E-12   | 2.42E-10   | 85.096954  | 66.796997  | 28.364744  | 27.35202   | 22.14492   |
| 8.16E-09   | 5.40E-07   | 6.186216   | 5.796962   | 1.905625   | 2.24561    | 1.756138   |
| 1.99E-05   | 0.00070929 | 10.951537  | 3.082652   | 7.651834   | 3.473698   | 0.981498   |
| 0.00018391 | 0.00536547 | 0.960215   | 1.374521   | 1.620149   | 0.292947   | 0.471465   |
| 0.00479711 | 0.08767273 | 0.755199   | 0.272875   | 0.18896    | 0.316887   | 0.617279   |
| 5.48E-23   | 1.65E-20   | 47.20443   | 30.360226  | 13.809419  | 17.570784  | 9.772547   |
| 5.72E-12   | 5.71E-10   | 45.895737  | 26.054296  | 12.859106  | 15.275689  | 6.622265   |
| 0.00313788 | 0.06205378 | 3.727301   | 4.077244   | 1.412113   | 1.088295   | 1.095963   |
| 2.25E-11   | 2.08E-09   | 18.425606  | 14.454528  | 4.943915   | 6.271508   | 4.411736   |
| 0.00059134 | 0.01493065 | 7.089963   | 5.756361   | 1.144229   | 3.981785   | 1.22919    |
| 2.01E-06   | 9.06E-05   | 5.5878     | 19.172302  | 4.985429   | 1.713473   | 13.921131  |
| 1.68E-07   | 9.33E-06   | 7.417384   | 6.15709    | 3.372651   | 3.007963   | 2.233524   |
| 1.88E-18   | 3.58E-16   | 6.542029   | 5.800491   | 2.13511    | 2.678225   | 1.76451    |
| 1.95E-19   | 4.54E-17   | 77.972488  | 36.615547  | 25.350605  | 27.307335  | 16.000351  |
| 1.61E-05   | 0.00058591 | 5.965014   | 1.264999   | 1.926158   | 1.992132   | 0.829879   |
| 0.00405163 | 0.07684044 | 2.554171   | 2.558058   | 0.588979   | 0.820331   | 0.325601   |
| 0.0041924  | 0.07914117 | 2.519029   | 2.392537   | 0.91676    | 0.908995   | 0.729983   |
| 1.37E-05   | 0.00050883 | 21.587593  | 17.142071  | 8.137116   | 6.447783   | 6.946197   |
| 0.00014513 | 0.00433448 | 5.662533   | 4.121942   | 1.132488   | 2.552407   | 0.978274   |
| 0.00019297 | 0.00557801 | 2.806196   | 2.727716   | 2.186091   | 0.9647     | 0.975683   |
| 6.57E-17   | 1.06E-14   | 7.150839   | 6.220499   | 4.863019   | 3.353588   | 3.005666   |
| 0.00073362 | 0.018052   | 10.462852  | 3.999136   | 4.408669   | 3.146512   | 2.209998   |
| 7.16E-09   | 4.88E-07   | 11.729897  | 11.081939  | 6.275597   | 5.812885   | 3.798349   |
| 0.00052941 | 0.01350269 | 7.269477   | 2.8854     | 2.372939   | 3.559478   | 1.212098   |
| 2.75E-07   | 1.46E-05   | 4.5681     | 4.074963   | 3.346018   | 2.371669   | 1.739124   |
| 1.20E-14   | 1.60E-12   | 20.104353  | 14.27679   | 8.490153   | 10.077503  | 4.406543   |
| 0.00171219 | 0.03757245 | 3.211141   | 1.835226   | 0.947887   | 1.424764   | 0.745903   |
| 5.14E-09   | 3.53E-07   | 14.315687  | 8.054109   | 8.18716    | 5.790667   | 3.946711   |
| 1.30E-05   | 0.00048753 | 5.157536   | 4.039093   | 2.581923   | 1.956924   | 1.716555   |
| 0.0025275  | 0.05167602 | 5.51518    | 3.475565   | 1.60942    | 2.413296   | 2.181291   |
| 1.33E-09   | 9.84E-08   | 6.877869   | 7.147384   | 4.592806   | 2.244012   | 3.526307   |
| 1.90E-14   | 2.41E-12   | 30.619795  | 16.591726  | 12.60299   | 12.223067  | 8.788799   |
| 7.10E-31   | 3.72E-28   | 64.655411  | 59.866505  | 38.543827  | 28.839556  | 26.944323  |
| 0.00010561 | 0.00327893 | 9.935167   | 42.337891  | 6.382      | 6.412056   | 12.830291  |
| 1.65E-42   | 1.30E-39   | 377.090179 | 265.539703 | 189.245667 | 160.213333 | 119.109558 |
| 0.00033486 | 0.0090744  | 2.084639   | 1.122344   | 0.439474   | 0.841697   | 0.5283     |
| 4.00E-11   | 3.57E-09   | 8.06093    | 3.930079   | 3.732452   | 3.982599   | 1.612057   |
| 9.32E-06   | 0.000364   | 10.826603  | 10.385159  | 3.888731   | 3.147075   | 4.617472   |

|            |            |            |           |           |           |           |
|------------|------------|------------|-----------|-----------|-----------|-----------|
| 8.06E-06   | 0.00032167 | 10.822872  | 5.900062  | 4.608518  | 4.298841  | 3.655808  |
| 0.00110053 | 0.02557856 | 5.381703   | 3.077818  | 1.701656  | 0.713947  | 0.738552  |
| 2.77E-14   | 3.48E-12   | 19.35737   | 11.183617 | 7.583993  | 8.825043  | 5.008744  |
| 4.72E-06   | 0.00019861 | 12.518338  | 8.233715  | 6.841302  | 5.242394  | 4.429369  |
| 1.19E-08   | 7.64E-07   | 4.085792   | 3.467788  | 1.663133  | 1.358731  | 1.414614  |
| 5.90E-19   | 1.26E-16   | 15.589176  | 12.032592 | 3.958478  | 7.400761  | 5.29979   |
| 2.12E-19   | 4.77E-17   | 29.921577  | 23.320913 | 19.207611 | 14.611248 | 9.594385  |
| 1.87E-18   | 3.58E-16   | 47.093067  | 40.315727 | 22.216019 | 23.436646 | 16.231573 |
| 2.86E-05   | 0.00099799 | 2.570049   | 1.845923  | 1.474304  | 1.413812  | 0.622666  |
| 0.00018983 | 0.00552532 | 3.489343   | 2.25174   | 2.63612   | 1.240915  | 1.129769  |
| 5.37E-21   | 1.38E-18   | 103.616051 | 62.60054  | 35.442078 | 47.328278 | 23.526966 |
| 0.00553404 | 0.09768432 | 3.827536   | 2.075953  | 1.178738  | 2.43247   | 1.247559  |
| 0.0012638  | 0.0289983  | 4.268123   | 2.140584  | 2.788359  | 1.662061  | 0.845835  |
| 1.83E-10   | 1.49E-08   | 26.224083  | 21.268042 | 15.60443  | 16.006456 | 12.901995 |
| 6.01E-11   | 5.24E-09   | 14.686881  | 8.734105  | 8.46398   | 7.888086  | 5.097232  |
| 3.30E-06   | 0.00014146 | 9.344515   | 6.567375  | 4.322354  | 3.975418  | 3.10423   |
| 2.05E-20   | 5.16E-18   | 64.3592    | 36.648026 | 25.292658 | 32.787941 | 19.07365  |
| 0.00012702 | 0.00384866 | 2.361834   | 2.267212  | 0.709584  | 0.477701  | 0.39217   |
| 0.00427039 | 0.08025203 | 181.107452 | 64.115074 | 58.405258 | 66.136642 | 38.227741 |
| 1.88E-07   | 1.03E-05   | 30.713911  | 17.627922 | 7.257835  | 20.056051 | 8.717971  |
| 0.00447087 | 0.08328404 | 7.954879   | 5.960425  | 3.710328  | 3.951322  | 2.71329   |
| 3.15E-05   | 0.00108983 | 8.540878   | 4.043073  | 2.098579  | 4.868915  | 2.135053  |
| 1.96E-08   | 1.23E-06   | 12.934611  | 9.883606  | 6.55583   | 7.123369  | 6.073146  |
| 0.00171586 | 0.03758757 | 6.374516   | 3.603042  | 3.790356  | 2.620755  | 1.712687  |
| 5.44E-05   | 0.00178459 | 12.895454  | 7.119803  | 5.158525  | 7.035832  | 3.758024  |
| 1.17E-08   | 7.58E-07   | 25.759783  | 14.341865 | 5.970601  | 13.584844 | 7.04603   |
| 2.71E-08   | 1.68E-06   | 43.011814  | 28.681158 | 23.877731 | 19.872627 | 17.361328 |
| 8.39E-08   | 4.82E-06   | 10.693164  | 7.708824  | 7.985976  | 4.08948   | 4.466555  |
| 0.0023111  | 0.04795343 | 7.716764   | 8.481009  | 2.994491  | 4.158756  | 4.925824  |
| 1.20E-07   | 6.76E-06   | 18.684689  | 15.563192 | 6.202909  | 7.898178  | 7.318629  |
| 0.00034846 | 0.00936215 | 13.496576  | 8.846697  | 5.612745  | 6.784609  | 5.564004  |
| 1.19E-06   | 5.54E-05   | 11.013589  | 8.759215  | 5.633575  | 4.633173  | 5.77721   |
| 9.00E-09   | 5.90E-07   | 57.689507  | 27.519737 | 32.698193 | 27.950855 | 14.686091 |
| 1.67E-18   | 3.29E-16   | 57.68425   | 35.834476 | 21.227242 | 36.066395 | 20.430902 |
| 3.12E-07   | 1.65E-05   | 13.7354    | 8.494358  | 3.815236  | 6.243441  | 4.110926  |
| 1.17E-06   | 5.46E-05   | 10.861307  | 6.261733  | 3.637485  | 6.686008  | 3.060046  |
| 0.0038991  | 0.07458612 | 6.423759   | 4.015412  | 2.844189  | 3.388267  | 2.023867  |
| 9.17E-07   | 4.44E-05   | 16.120956  | 12.557734 | 8.298406  | 8.561433  | 7.895661  |
| 8.10E-11   | 6.79E-09   | 14.016539  | 14.048769 | 10.395332 | 7.007762  | 8.946351  |
| 1.46E-15   | 2.10E-13   | 46.037117  | 34.392822 | 20.394287 | 23.593107 | 21.972425 |
| 5.82E-08   | 3.40E-06   | 32.384029  | 23.420065 | 14.63341  | 13.993922 | 15.164062 |

|            |            |            |           |           |           |           |
|------------|------------|------------|-----------|-----------|-----------|-----------|
| 0.00029898 | 0.00820823 | 2.687033   | 2.159446  | 1.168866  | 1.194689  | 0.889754  |
| 1.26E-08   | 8.00E-07   | 21.252384  | 22.043003 | 14.802416 | 11.483178 | 13.954502 |
| 5.51E-08   | 3.27E-06   | 36.933323  | 19.425303 | 11.248456 | 21.505285 | 11.743948 |
| 1.46E-10   | 1.21E-08   | 13.437894  | 20.712416 | 14.705329 | 6.710862  | 12.993626 |
| 7.07E-12   | 6.90E-10   | 51.564384  | 27.479868 | 19.157101 | 32.116348 | 17.985512 |
| 1.04E-06   | 5.01E-05   | 9.089192   | 6.247429  | 4.299611  | 4.933794  | 3.162742  |
| 0.00071137 | 0.01760776 | 6.585918   | 3.895901  | 3.111949  | 4.030715  | 3.017349  |
| 8.45E-06   | 0.00033503 | 9.951653   | 7.249238  | 3.11383   | 6.142224  | 3.328932  |
| 0.00035801 | 0.00955747 | 9.387391   | 3.404014  | 7.476992  | 5.12479   | 2.992265  |
| 5.01E-12   | 5.04E-10   | 25.576368  | 20.503059 | 6.877878  | 16.377663 | 11.940587 |
| 2.31E-10   | 1.87E-08   | 16.966534  | 13.019703 | 6.455876  | 10.365451 | 7.504558  |
| 6.03E-06   | 0.0002459  | 14.710692  | 10.013965 | 6.004869  | 10.158913 | 5.113986  |
| 0.00101934 | 0.02409238 | 3.883      | 7.325479  | 3.050081  | 1.664318  | 4.103409  |
| 2.90E-06   | 0.00012553 | 23.767653  | 21.673767 | 16.604858 | 16.614275 | 11.564331 |
| 6.27E-08   | 3.65E-06   | 12.032354  | 7.318275  | 4.377397  | 6.137137  | 5.00458   |
| 0.00035725 | 0.00955747 | 6.36257    | 5.32155   | 4.664724  | 3.348524  | 3.792396  |
| 0.00081703 | 0.01979456 | 6.95848    | 6.412047  | 4.105591  | 4.195502  | 4.457946  |
| 5.79E-05   | 0.00188758 | 12.976544  | 7.484915  | 4.995967  | 6.574714  | 4.510756  |
| 1.79E-05   | 0.00064501 | 5.783968   | 3.944732  | 1.862944  | 3.36742   | 2.264999  |
| 7.91E-09   | 5.29E-07   | 29.365616  | 20.475397 | 14.460233 | 39.353924 | 12.047372 |
| 0.00517727 | 0.09313158 | 7.507488   | 4.082476  | 2.147686  | 4.794239  | 2.123043  |
| 1.96E-06   | 8.92E-05   | 14.384971  | 8.077026  | 5.820161  | 9.009305  | 5.78369   |
| 0.0002532  | 0.00702804 | 12.169815  | 10.888396 | 8.078849  | 8.718819  | 5.840054  |
| 0.00193984 | 0.04155289 | 3.717394   | 3.874202  | 2.961509  | 2.287865  | 2.030159  |
| 2.10E-09   | 1.51E-07   | 7.719209   | 5.617309  | 6.022685  | 4.510394  | 3.459018  |
| 0.00087133 | 0.02090857 | 15.378776  | 8.603189  | 4.632563  | 8.293031  | 4.799883  |
| 1.23E-09   | 9.18E-08   | 66.279938  | 39.044907 | 21.427752 | 43.083981 | 25.691875 |
| 3.03E-05   | 0.0010508  | 15.572724  | 15.093215 | 9.091022  | 8.41381   | 9.296747  |
| 0.00027493 | 0.00758099 | 13.221856  | 12.849791 | 10.139407 | 6.71907   | 9.192681  |
| 0.0021389  | 0.04512507 | 8.386169   | 8.841666  | 5.539279  | 5.649087  | 5.40149   |
| 0.00025506 | 0.00706412 | 7.119617   | 6.549412  | 7.056783  | 4.979057  | 3.263849  |
| 0.00032638 | 0.00888291 | 40.218269  | 1.122696  | 22.534019 | 21.499187 | 16.289047 |
| 0.00105271 | 0.02477217 | 5.346155   | 5.361545  | 5.893312  | 3.640168  | 2.990957  |
| 0.00313872 | 0.06205378 | 5.088168   | 3.376513  | 2.873981  | 3.270843  | 2.016132  |
| 0.00136057 | 0.03082484 | 9.706476   | 6.580061  | 4.018886  | 6.289468  | 4.421441  |
| 8.88E-06   | 0.00035011 | 16.589741  | 12.814799 | 6.567553  | 11.12563  | 8.014856  |
| 7.59E-10   | 5.89E-08   | 40.427704  | 25.731316 | 21.550533 | 28.644299 | 14.82741  |
| 8.23E-10   | 6.35E-08   | 103.765007 | 96.054039 | 53.056091 | 58.923458 | 67.652756 |
| 0.00032461 | 0.00885393 | 66.840874  | 57.083302 | 41.068096 | 45.057056 | 27.762449 |
| 3.37E-05   | 0.00115187 | 46.014454  | 23.358501 | 14.068054 | 26.007341 | 16.190464 |
| 2.58E-05   | 0.00091057 | 7.96977    | 5.74492   | 3.218968  | 4.972386  | 4.388329  |

|            |            |            |            |            |            |            |
|------------|------------|------------|------------|------------|------------|------------|
| 1.31E-05   | 0.00049119 | 22.807611  | 23.004938  | 13.449797  | 13.709291  | 16.944534  |
| 0.00162526 | 0.03597882 | 6.430892   | 15.026739  | 9.44056    | 5.118409   | 12.438532  |
| 0.00040754 | 0.01078819 | 3.600241   | 2.685993   | 1.611683   | 1.67152    | 1.227454   |
| 0.00220776 | 0.0462673  | 0          | 0          | 0          | 0          | 0.062135   |
| 0.00024129 | 0.0067272  | 16.760033  | 18.705767  | 12.523675  | 9.458135   | 14.34263   |
| 0.000974   | 0.02310757 | 15.071824  | 10.354993  | 3.933474   | 8.626012   | 6.375893   |
| 1.85E-07   | 1.02E-05   | 21.593004  | 11.190986  | 9.33955    | 14.523291  | 8.174283   |
| 1.96E-05   | 0.00070279 | 19.131939  | 17.287193  | 10.96904   | 11.534181  | 12.092853  |
| 0.00185814 | 0.04028324 | 15.936108  | 14.761209  | 12.089433  | 11.876451  | 9.662609   |
| 5.64E-06   | 0.00023266 | 53.300941  | 39.297268  | 26.089256  | 31.805031  | 24.248459  |
| 5.68E-07   | 2.84E-05   | 30.731667  | 18.581614  | 14.748111  | 19.821621  | 15.052461  |
| 1.14E-05   | 0.00043225 | 128.257935 | 68.634499  | 98.284897  | 39.139256  | 41.898029  |
| 9.12E-06   | 0.0003574  | 35.899204  | 16.944525  | 12.297343  | 18.392485  | 11.686858  |
| 9.24E-10   | 7.09E-08   | 75.714935  | 100.265808 | 53.630402  | 58.94891   | 65.382065  |
| 3.19E-05   | 0.00110172 | 32.933453  | 20.105364  | 16.679171  | 21.319178  | 15.130391  |
| 0.00016782 | 0.00495336 | 7.557531   | 7.217301   | 6.154171   | 4.782262   | 4.716291   |
| 5.68E-08   | 3.34E-06   | 29.722816  | 27.519691  | 19.324043  | 21.431051  | 18.538502  |
| 0.00023611 | 0.00662683 | 14.92763   | 10.680738  | 9.010339   | 11.698913  | 8.41001    |
| 0.0006795  | 0.01685206 | 14.748182  | 11.177931  | 10.514322  | 10.971577  | 7.977923   |
| 0.00104903 | 0.02474755 | 56.843231  | 22.51922   | 15.008665  | 33.709473  | 19.096848  |
| 5.37E-06   | 0.00022414 | 25.31716   | 28.052736  | 18.808758  | 14.103708  | 19.628531  |
| 0.00039565 | 0.01049555 | 28.425129  | 22.376415  | 13.543953  | 18.341713  | 14.7328    |
| 0.00031351 | 0.00858838 | 25.487541  | 9.92571    | 9.709761   | 14.669248  | 6.692115   |
| 0.00010433 | 0.00324727 | 47.562473  | 20.787882  | 17.87409   | 30.595818  | 15.315709  |
| 0.00190064 | 0.04099248 | 25.563097  | 12.581832  | 14.0022    | 18.895275  | 12.198601  |
| 2.86E-06   | 0.00012451 | 69.132294  | 46.395477  | 26.563736  | 50.735668  | 31.335636  |
| 3.60E-07   | 1.88E-05   | 41.330326  | 45.154221  | 31.177288  | 29.638622  | 33.977772  |
| 0.0017883  | 0.03903844 | 10.319897  | 6.964035   | 4.935097   | 6.973598   | 5.126095   |
| 8.68E-06   | 0.00034328 | 36.695454  | 23.905743  | 14.656396  | 24.491486  | 17.889748  |
| 0.00501453 | 0.09059294 | 9.400364   | 7.395982   | 3.098795   | 7.000819   | 4.438772   |
| 0.00518564 | 0.09314897 | 42.786369  | 21.535242  | 9.651755   | 32.415131  | 13.098319  |
| 2.70E-07   | 1.44E-05   | 385.359833 | 440.124756 | 271.717499 | 232.546356 | 316.758759 |
| 1.17E-06   | 5.46E-05   | 17.808033  | 30.282089  | 23.474743  | 12.603952  | 21.845743  |
| 1.76E-05   | 0.00063687 | 14.063099  | 26.191301  | 12.085088  | 11.629547  | 17.758438  |
| 0.00156714 | 0.03487646 | 36.602184  | 21.685568  | 14.602518  | 20.953606  | 16.945189  |
| 0.00048296 | 0.0124925  | 22.639294  | 15.497842  | 11.032     | 14.519748  | 9.533933   |
| 0.00269504 | 0.05474546 | 15.941346  | 34.693272  | 21.900343  | 11.029063  | 24.263859  |
| 0.00131371 | 0.02993802 | 2.455524   | 1.797557   | 1.399784   | 1.771238   | 1.39317    |
| 0.00472807 | 0.08666291 | 28.183439  | 14.388532  | 9.241445   | 19.33786   | 10.295267  |
| 0.00019247 | 0.0055762  | 42.177383  | 29.018522  | 25.252266  | 26.474308  | 23.10729   |
| 6.20E-06   | 0.0002513  | 65.995903  | 67.128044  | 43.251995  | 47.348492  | 51.852016  |

|            |            |            |            |            |            |            |
|------------|------------|------------|------------|------------|------------|------------|
| 0.00034198 | 0.00920775 | 15.658623  | 11.183031  | 9.394699   | 11.340837  | 7.454704   |
| 0.00011588 | 0.00353646 | 25.396883  | 14.145727  | 6.868542   | 21.095263  | 9.863111   |
| 0.00322653 | 0.06339117 | 20.820374  | 22.511696  | 27.329344  | 12.301377  | 17.591656  |
| 4.85E-06   | 0.00020344 | 1144.94812 | 909.503296 | 708.039978 | 730.15271  | 724.082886 |
| 1.13E-05   | 0.0004299  | 17.513754  | 14.982785  | 9.238485   | 13.494775  | 10.458986  |
| 9.05E-05   | 0.00282307 | 41.513752  | 48.257256  | 28.87035   | 32.114807  | 38.922146  |
| 0.00252242 | 0.05165614 | 11.449274  | 24.253851  | 16.166191  | 10.190065  | 16.00672   |
| 0.00041283 | 0.01090518 | 19.180265  | 22.871675  | 17.702389  | 13.565813  | 17.58675   |
| 0.00012002 | 0.00364513 | 23.612934  | 46.930386  | 35.040249  | 14.063008  | 37.632061  |
| 0.00232676 | 0.04811951 | 18.081547  | 13.334013  | 10.168788  | 13.524615  | 9.509759   |
| 0.00309703 | 0.06171475 | 14.032049  | 11.057383  | 10.623135  | 18.211037  | 13.758798  |
| 3.24E-05   | 0.00111465 | 14.880436  | 15.197618  | 13.832116  | 9.986046   | 12.59387   |
| 0.00033968 | 0.00916563 | 78.678856  | 48.251598  | 41.796089  | 47.874271  | 37.648514  |
| 0.00199296 | 0.04261821 | 19.18936   | 9.942244   | 7.122882   | 13.165858  | 6.606622   |
| 0.00395746 | 0.07539554 | 12.287225  | 10.269343  | 7.253546   | 8.979812   | 8.245514   |
| 0.00123498 | 0.02838877 | 18.846657  | 11.762637  | 13.421133  | 12.442928  | 8.768778   |
| 1.15E-05   | 0.00043396 | 129.728195 | 81.49617   | 49.021893  | 92.178444  | 63.267792  |
| 1.52E-05   | 0.00055556 | 285.219788 | 232.445145 | 183.691635 | 200.002274 | 188.218445 |
| 2.97E-05   | 0.00103459 | 34.89669   | 54.246506  | 47.425095  | 29.219296  | 38.591404  |
| 0.00324338 | 0.06362278 | 20.955059  | 15.620075  | 14.489892  | 16.280672  | 14.109117  |
| 0.0019172  | 0.0412648  | 28.846821  | 21.853407  | 19.190666  | 19.380394  | 20.166451  |
| 0.00026119 | 0.00721804 | 225.983627 | 121.729042 | 104.315979 | 149.601089 | 97.843307  |
| 0.0022062  | 0.0462673  | 22.361254  | 17.472902  | 11.132943  | 19.342518  | 12.479206  |
| 0.00076349 | 0.01864096 | 27.396799  | 28.27335   | 20.953066  | 21.067099  | 23.00061   |
| 0.00053956 | 0.01367909 | 63.487343  | 34.232002  | 12.476165  | 50.463352  | 22.132792  |
| 0.00202135 | 0.04292156 | 55.852562  | 89.656387  | 71.894127  | 44.887402  | 64.633781  |
| 0.00309207 | 0.06171384 | 14.536534  | 8.78428    | 12.393567  | 10.228708  | 5.924556   |
| 0.00113016 | 0.02617062 | 16.136913  | 23.893476  | 16.072538  | 13.139542  | 18.131784  |
| 0.0019982  | 0.0426577  | 73.741882  | 47.273689  | 60.530956  | 51.80341   | 31.622246  |
| 0.00551563 | 0.09768432 | 23.205     | 26.034613  | 18.994444  | 17.375408  | 22.530115  |
| 2.63E-07   | 1.41E-05   | 1307.23193 | 846.218201 | 650.853882 | 1071.53516 | 572.540527 |
| 0.00460261 | 0.08510758 | 29.833982  | 24.741043  | 23.693195  | 23.431606  | 20.036148  |
| 0.00062422 | 0.01563536 | 84.987289  | 27.746264  | 27.307293  | 64.837013  | 22.874851  |
| 0.00107772 | 0.025095   | 24.279097  | 21.111683  | 15.251136  | 18.124702  | 14.3997    |
| 0.00074747 | 0.01832099 | 43.664013  | 43.216793  | 41.284039  | 31.311819  | 34.792011  |
| 0.00075421 | 0.01845021 | 22.076653  | 19.194881  | 15.418286  | 16.949074  | 13.847177  |
| 0.0001793  | 0.00524318 | 50.658306  | 53.723301  | 37.814636  | 41.123062  | 43.693134  |
| 0.00449411 | 0.08359313 | 40.410706  | 29.390661  | 16.817333  | 36.635139  | 24.275679  |
| 0.00140897 | 0.031693   | 67.5186    | 86.764793  | 65.634216  | 55.151749  | 70.25222   |
| 0.00212759 | 0.04496183 | 36.565842  | 30.440659  | 20.646826  | 28.555254  | 24.957773  |
| 1.50E-05   | 0.00055273 | 35.244595  | 44.68655   | 45.877869  | 29.699514  | 33.114571  |



|            |            |            |            |            |            |            |
|------------|------------|------------|------------|------------|------------|------------|
| 8.57E-05   | 0.00268816 | 126.969543 | 120.489136 | 86.030518  | 94.217064  | 105.825455 |
| 0.00017328 | 0.00510262 | 14.610661  | 24.18412   | 20.269634  | 12.55707   | 18.301817  |
| 5.48E-05   | 0.00179452 | 202.722305 | 158.751419 | 148.072723 | 140.069626 | 130.263931 |
| 0.00552422 | 0.09768432 | 19.965401  | 22.020403  | 16.196583  | 13.60742   | 16.186054  |
| 0.00051059 | 0.01310225 | 37.568531  | 33.821404  | 19.38969   | 28.211695  | 26.47703   |
| 0.00023886 | 0.00667418 | 114.248711 | 118.120102 | 112.771164 | 82.950333  | 93.795425  |
| 0.00046591 | 0.01210414 | 33.995781  | 37.659641  | 35.884403  | 20.372595  | 27.468781  |
| 0.00482909 | 0.08787409 | 12.90143   | 10.487988  | 12.286939  | 11.006511  | 8.910869   |
| 0.00189002 | 0.0408336  | 52.334248  | 42.601509  | 41.652924  | 38.185577  | 35.56638   |
| 0.00077494 | 0.01888391 | 14.011999  | 16.746944  | 9.669378   | 10.715446  | 13.094362  |
| 0.00285063 | 0.05744201 | 11.413986  | 15.992658  | 12.334248  | 9.926718   | 13.692042  |
| 4.80E-05   | 0.00159208 | 32.527718  | 80.851051  | 53.844559  | 27.5506    | 60.017178  |
| 0.00140188 | 0.03159003 | 12.384137  | 10.134461  | 9.168872   | 9.048421   | 8.202064   |
| 0.0055461  | 0.09768432 | 27.377855  | 50.092876  | 23.660152  | 22.43383   | 33.029755  |
| 0.00105401 | 0.02477217 | 21.230877  | 37.369518  | 30.568117  | 17.562935  | 29.907978  |
| 0.00020941 | 0.00598449 | 381.763306 | 300.049591 | 253.661545 | 285.266998 | 239.328949 |
| 0.00043185 | 0.01136005 | 51.436935  | 57.960873  | 46.176212  | 40.495415  | 46.282356  |
| 0.00301916 | 0.06045052 | 74.643639  | 72.07148   | 73.882812  | 58.113472  | 57.102966  |
| 0.00231796 | 0.04801649 | 43.922394  | 47.921387  | 36.977634  | 34.63271   | 38.385406  |
| 0.00060514 | 0.01524856 | 220.665588 | 183.136871 | 122.249619 | 170.980469 | 160.544388 |
| 0.00545928 | 0.09707202 | 16.693695  | 19.95796   | 17.493429  | 10.786489  | 15.848628  |
| 0.00106845 | 0.02499863 | 50.547653  | 63.297531  | 67.868172  | 39.852299  | 50.508041  |
| 0.00276798 | 0.05595597 | 61.601894  | 68.841438  | 71.540878  | 44.901268  | 55.172089  |
| 0.00350267 | 0.06807198 | 23.757021  | 47.024475  | 40.305248  | 21.173725  | 34.175095  |
| 0.00175163 | 0.03830443 | 201.262726 | 181.367035 | 161.745255 | 155.908875 | 147.506439 |
| 0.00035056 | 0.00939863 | 46.56876   | 47.515797  | 50.544983  | 36.611706  | 39.067738  |
| 0.00020527 | 0.00587947 | 50.394577  | 80.587044  | 79.212158  | 40.710857  | 67.938103  |
| 0.00345786 | 0.06740945 | 46.449013  | 28.676189  | 25.659433  | 34.162041  | 24.339262  |
| 0.00139914 | 0.03158493 | 183.924118 | 94.961815  | 75.062828  | 155.808884 | 73.946136  |
| 0.00229551 | 0.04770875 | 617.106567 | 487.335907 | 434.908752 | 470.369843 | 431.905609 |
| 0.00142275 | 0.03194579 | 58.219616  | 75.839104  | 57.701168  | 46.544785  | 60.962208  |
| 0.00499142 | 0.09030527 | 28.269642  | 42.735573  | 41.867069  | 23.408777  | 37.516567  |
| 0.00186657 | 0.04039628 | 29.946981  | 61.398998  | 50.961803  | 27.483982  | 45.810604  |
| 0.00442317 | 0.08254384 | 17.766069  | 45.891949  | 25.152807  | 15.036205  | 35.345261  |
| 0.00290841 | 0.05841915 | 148.54631  | 143.53035  | 123.98317  | 112.096519 | 121.894623 |
| 0.00085472 | 0.02062815 | 329.217041 | 284.270416 | 198.171646 | 291.199066 | 211.364685 |
| 0.0008769  | 0.02100212 | 85.29995   | 113.277214 | 108.11544  | 74.314217  | 92.489082  |
| 0.00183451 | 0.03983955 | 70.545212  | 61.524487  | 66.689713  | 57.728523  | 50.558334  |
| 0.00434509 | 0.08142356 | 25.349543  | 38.871231  | 30.17135   | 20.285507  | 33.514721  |
| 0.00390311 | 0.07458612 | 124.562508 | 105.068687 | 116.430946 | 98.543755  | 88.086349  |
| 0.00119261 | 0.02756598 | 259.936066 | 228.26033  | 198.124893 | 219.739136 | 184.168777 |

|            |            |            |            |            |            |            |
|------------|------------|------------|------------|------------|------------|------------|
| 0.00525603 | 0.0938769  | 68.21743   | 50.266945  | 37.387249  | 61.065598  | 42.643391  |
| 0.00492895 | 0.08930351 | 77.538643  | 71.225685  | 68.803612  | 62.214935  | 56.700485  |
| 0.00419812 | 0.07914117 | 58.433273  | 40.500214  | 23.643517  | 51.56916   | 34.929504  |
| 0.00504785 | 0.09093367 | 81.287392  | 81.646294  | 96.826721  | 65.93103   | 71.802055  |
| 0.00370068 | 0.07147826 | 412.022736 | 440.962555 | 466.768433 | 351.531982 | 364.473755 |
| 0.00224229 | 0.04667965 | 1051.0127  | 642.017761 | 632.744385 | 1144.50916 | 747.839233 |
| 0.00392327 | 0.0748576  | 160.17453  | 165.57132  | 163.318466 | 183.319153 | 175.374878 |
| 0.00255139 | 0.05207987 | 641.527832 | 346.69812  | 448.410858 | 673.146362 | 414.458801 |
| 0.00462826 | 0.0853362  | 187.449066 | 149.455536 | 167.262222 | 207.082428 | 154.458252 |
| 0.00330972 | 0.06482304 | 414.772583 | 275.863647 | 291.412231 | 419.414795 | 337.088684 |
| 0.00258076 | 0.05259397 | 66.26252   | 59.625244  | 60.990181  | 74.495697  | 67.268547  |
| 0.00126883 | 0.02906066 | 260.592804 | 242.114029 | 314.126251 | 292.018555 | 274.48114  |
| 0.00220161 | 0.0462673  | 97.383675  | 81.256386  | 99.974754  | 110.338547 | 90.394119  |
| 0.00053107 | 0.01351767 | 673.13446  | 346.769958 | 343.940613 | 747.167114 | 381.566803 |
| 0.00468732 | 0.08612287 | 123.64827  | 79.192566  | 80.059326  | 125.715332 | 94.834076  |
| 0.00427396 | 0.08025203 | 41.432446  | 26.028751  | 19.776875  | 48.347424  | 27.161175  |
| 0.00486639 | 0.08842486 | 44.854843  | 36.070496  | 27.53491   | 54.500282  | 42.264423  |
| 0.0001316  | 0.00397776 | 62.850517  | 71.35463   | 63.896835  | 78.904228  | 87.450684  |
| 0.00218525 | 0.0460256  | 37.099895  | 31.942863  | 39.541843  | 40.939873  | 37.575329  |
| 0.0032122  | 0.06320845 | 72.698227  | 56.326073  | 55.142456  | 86.403473  | 76.970947  |
| 0.00182203 | 0.03963713 | 98.479477  | 71.202431  | 55.789253  | 121.386452 | 82.521255  |
| 0.00042641 | 0.01124046 | 229.357162 | 186.963547 | 106.04229  | 300.213654 | 224.881912 |
| 0.00273005 | 0.0552781  | 96.496445  | 57.699356  | 55.955467  | 99.869766  | 71.126694  |
| 7.91E-05   | 0.00249777 | 134.325485 | 149.078857 | 143.24649  | 177.608124 | 177.038666 |
| 0.00149827 | 0.03346217 | 43.7584    | 37.814507  | 32.829136  | 45.490047  | 42.355598  |
| 0.003161   | 0.06229849 | 42.576328  | 23.836449  | 14.183715  | 47.431339  | 29.857325  |
| 4.25E-05   | 0.00142898 | 155.967819 | 161.402435 | 183.925766 | 190.144073 | 180.529266 |
| 0.00363194 | 0.07036681 | 4.09982    | 2.513766   | 3.478172   | 4.891621   | 3.123064   |
| 0.00223989 | 0.04667965 | 39.620388  | 23.417812  | 21.787521  | 42.949451  | 29.48177   |
| 0.00164321 | 0.03624856 | 16.194412  | 8.73575    | 6.179078   | 17.774427  | 11.113011  |
| 0.00243558 | 0.05012277 | 24.789064  | 50.741776  | 32.694321  | 32.783306  | 60.829628  |
| 1.13E-05   | 0.0004299  | 0.788766   | 0.733223   | 0.182423   | 1.2863     | 1.08972    |
| 0.00089483 | 0.02130972 | 46.808399  | 31.768538  | 29.788191  | 50.975712  | 36.244884  |
| 5.91E-05   | 0.00190411 | 100.898254 | 118.824837 | 106.525284 | 131.101929 | 129.929932 |
| 0.0012252  | 0.02821552 | 137.454025 | 61.377548  | 40.959805  | 141.108383 | 84.717567  |
| 0.00240156 | 0.04950369 | 129.035141 | 118.766922 | 107.795532 | 177.149307 | 142.848312 |
| 0.00053959 | 0.01367909 | 37.795677  | 49.757759  | 45.924564  | 49.951061  | 58.915276  |
| 0.00457215 | 0.0847938  | 4.081638   | 3.44636    | 10.692698  | 4.7905     | 4.042638   |
| 5.87E-05   | 0.0019016  | 162.700729 | 111.047157 | 86.05703   | 188.990387 | 143.553787 |
| 0.00013806 | 0.00415296 | 36.336319  | 28.696768  | 27.134966  | 48.249462  | 35.629459  |
| 5.42E-07   | 2.71E-05   | 333.623016 | 185.798859 | 139.46817  | 354.82135  | 230.730087 |

|            |            |            |            |            |            |            |
|------------|------------|------------|------------|------------|------------|------------|
| 0.00144691 | 0.03243043 | 22.514042  | 14.036055  | 13.620641  | 27.867491  | 17.155767  |
| 2.71E-05   | 0.00095219 | 153.708496 | 110.89093  | 91.370964  | 171.029739 | 155.209229 |
| 0.00314957 | 0.06217069 | 53.822506  | 22.975185  | 22.283426  | 53.364372  | 31.719839  |
| 0.00272732 | 0.0552781  | 30.885113  | 20.839405  | 21.745047  | 37.018612  | 22.677423  |
| 0.00379134 | 0.07267881 | 20.477083  | 14.097073  | 9.011218   | 24.697195  | 17.177195  |
| 3.36E-05   | 0.00115187 | 32.947803  | 22.644426  | 13.450715  | 41.01778   | 27.442808  |
| 0.00412512 | 0.07811638 | 23.193939  | 25.562538  | 16.200579  | 36.843468  | 34.143707  |
| 0.00131428 | 0.02993802 | 28.49078   | 14.335232  | 11.597048  | 35.90239   | 20.764303  |
| 7.64E-08   | 4.41E-06   | 245.060318 | 152.662964 | 107.780823 | 315.453003 | 191.400726 |
| 0.00010616 | 0.00328795 | 37.934433  | 40.107738  | 24.173861  | 50.076794  | 47.646534  |
| 3.35E-05   | 0.00115102 | 40.999882  | 37.864246  | 39.632595  | 58.354202  | 43.504513  |
| 0.00120665 | 0.02783932 | 23.852737  | 11.311954  | 12.020345  | 29.321577  | 14.359073  |
| 0.00048384 | 0.0124925  | 16.922827  | 7.648012   | 6.076237   | 22.120594  | 9.922949   |
| 0.00090963 | 0.02162131 | 17.268957  | 11.928306  | 8.814012   | 23.784239  | 13.437215  |
| 0.00209864 | 0.0444247  | 21.28886   | 8.37196    | 5.917177   | 27.186523  | 17.763042  |
| 0.00015224 | 0.00451473 | 35.067776  | 34.69278   | 19.805969  | 46.751957  | 41.78389   |
| 0.00521447 | 0.09353312 | 12.160991  | 5.324173   | 3.080972   | 13.658435  | 7.58841    |
| 4.53E-05   | 0.00151803 | 69.871216  | 41.068329  | 22.820591  | 81.994949  | 48.547375  |
| 0.00023762 | 0.00665453 | 210.055893 | 137.067001 | 55.842072  | 242.054459 | 172.62413  |
| 0.00049309 | 0.01267927 | 50.569336  | 41.746136  | 22.629198  | 63.8283    | 52.721672  |
| 0.00526418 | 0.09388909 | 11.446387  | 8.491279   | 3.788681   | 14.236606  | 9.204403   |
| 0.00166194 | 0.03659767 | 63.311661  | 27.540541  | 17.838243  | 63.007172  | 46.045872  |
| 0.00021329 | 0.00606774 | 115.699783 | 66.435997  | 52.585823  | 127.348038 | 82.805397  |
| 2.79E-06   | 0.00012212 | 92.901436  | 58.722065  | 36.574169  | 113.037537 | 73.165321  |
| 0.0022403  | 0.04667965 | 22.177711  | 12.949067  | 12.980744  | 28.224754  | 14.710841  |
| 4.96E-07   | 2.52E-05   | 225.586868 | 185.508591 | 158.158005 | 270.759979 | 237.52182  |
| 0.00017756 | 0.00520438 | 36.236225  | 25.752642  | 12.760843  | 40.602612  | 36.855381  |
| 3.48E-05   | 0.0011855  | 18.859928  | 53.790966  | 20.632988  | 26.85408   | 28.017855  |
| 0.00413723 | 0.07822783 | 22.578699  | 13.01436   | 1.816262   | 29.332115  | 18.372242  |
| 2.28E-06   | 0.0001017  | 141.820496 | 64.423126  | 53.112011  | 164.975433 | 98.702705  |
| 0.00477933 | 0.08747499 | 66.236908  | 28.356407  | 19.935463  | 76.306152  | 37.177029  |
| 0.00071851 | 0.01774961 | 20.459379  | 10.501005  | 7.119339   | 22.191523  | 14.530869  |
| 0.0031361  | 0.06205378 | 12.230588  | 6.011241   | 5.202731   | 12.715743  | 6.878371   |
| 1.16E-06   | 5.46E-05   | 279.79425  | 147.207077 | 109.769676 | 343.855774 | 206.128189 |
| 1.34E-05   | 0.0005011  | 19.976149  | 17.988272  | 12.784945  | 24.234211  | 20.39185   |
| 1.06E-06   | 5.07E-05   | 858.440491 | 401.448425 | 406.407288 | 997.157288 | 582.999023 |
| 0.00338444 | 0.06618346 | 20.901466  | 14.953341  | 9.663064   | 22.260798  | 20.800303  |
| 0.00112206 | 0.0260309  | 109.503838 | 37.747421  | 40.489361  | 135.46669  | 62.691978  |
| 0.00014183 | 0.00424602 | 26.330027  | 11.214291  | 9.318563   | 31.322001  | 15.226139  |
| 8.26E-06   | 0.00032887 | 16.447428  | 13.497072  | 7.391469   | 21.847063  | 17.694656  |
| 4.73E-05   | 0.00157225 | 132.083237 | 58.889828  | 39.658768  | 148.014175 | 87.390793  |

|            |            |            |            |           |            |            |
|------------|------------|------------|------------|-----------|------------|------------|
| 0.00019907 | 0.00573322 | 15.206781  | 12.910978  | 14.085193 | 22.163406  | 16.695812  |
| 0.00313492 | 0.06205378 | 15.22506   | 5.754626   | 4.932031  | 20.81551   | 7.681855   |
| 0.00454027 | 0.08432699 | 23.271811  | 9.635519   | 11.608045 | 27.086779  | 13.321656  |
| 0.00533405 | 0.09500044 | 25.380108  | 10.0488    | 13.674168 | 30.082012  | 18.77355   |
| 0.00469176 | 0.08612287 | 22.289335  | 11.896482  | 10.345404 | 27.065826  | 15.957232  |
| 2.09E-06   | 9.37E-05   | 261.42746  | 107.030167 | 88.591377 | 287.121399 | 157.472183 |
| 4.51E-06   | 0.00019082 | 15.96929   | 12.285295  | 15.397243 | 22.330347  | 15.623535  |
| 2.54E-06   | 0.00011185 | 95.086311  | 59.522259  | 71.185112 | 131.729828 | 77.539589  |
| 0.00086263 | 0.0207772  | 18.32618   | 12.124937  | 4.617385  | 26.199322  | 15.954912  |
| 2.91E-07   | 1.55E-05   | 27.458994  | 14.370686  | 10.765048 | 34.567764  | 20.064566  |
| 1.56E-07   | 8.70E-06   | 46.523434  | 29.279987  | 24.329947 | 58.057518  | 38.155521  |
| 0.00033644 | 0.00909769 | 12.390989  | 5.628951   | 4.953355  | 17.46656   | 12.952461  |
| 2.40E-06   | 0.00010664 | 51.005322  | 20.248251  | 14.403879 | 56.799324  | 30.853067  |
| 0.00014814 | 0.00440345 | 54.980911  | 29.479818  | 22.503183 | 61.665653  | 50.904385  |
| 0.00439419 | 0.08222102 | 11.776012  | 1.888636   | 16.41091  | 16.732548  | 2.427315   |
| 0.00024659 | 0.00685969 | 13.459718  | 5.553687   | 4.03835   | 17.905188  | 8.134964   |
| 5.48E-06   | 0.00022753 | 28.530012  | 23.319012  | 24.501284 | 42.470718  | 30.247101  |
| 0.00378234 | 0.07267881 | 13.184597  | 6.608656   | 17.671751 | 18.807583  | 10.270307  |
| 5.22E-05   | 0.00172114 | 15.031091  | 8.649768   | 7.437141  | 21.545788  | 12.040118  |
| 0.00021735 | 0.00615517 | 43.307182  | 30.024036  | 18.979832 | 56.3979    | 45.913208  |
| 0.00372983 | 0.07193086 | 15.142877  | 3.954036   | 5.058547  | 15.413916  | 6.975338   |
| 0.00072677 | 0.01791838 | 114.246216 | 88.657753  | 36.167019 | 131.249466 | 111.977318 |
| 0.00106961 | 0.02499863 | 26.077663  | 11.693439  | 8.26971   | 33.286053  | 17.98382   |
| 0.00021059 | 0.00600447 | 44.559502  | 16.912521  | 12.416692 | 51.468697  | 24.390835  |
| 4.44E-07   | 2.29E-05   | 37.197662  | 30.67635   | 20.13183  | 56.765327  | 34.793003  |
| 5.73E-06   | 0.00023487 | 56.749313  | 20.040407  | 20.27475  | 72.299805  | 31.553383  |
| 2.45E-07   | 1.33E-05   | 17.673134  | 12.568579  | 11.006283 | 23.179377  | 18.432327  |
| 6.10E-11   | 5.29E-09   | 48.510925  | 51.159481  | 26.677181 | 71.538567  | 65.940041  |
| 4.84E-09   | 3.34E-07   | 916.054565 | 311.088074 | 238.60553 | 1064.48657 | 427.701782 |
| 2.93E-06   | 0.00012666 | 33.289856  | 15.168954  | 12.060903 | 40.474701  | 21.350069  |
| 0.00134182 | 0.03045498 | 13.261333  | 7.783974   | 4.125915  | 14.659923  | 10.267187  |
| 0.00442457 | 0.08254384 | 8.255744   | 1.898432   | 1.984712  | 11.374215  | 3.04003    |
| 3.26E-08   | 1.98E-06   | 24.660986  | 16.219318  | 17.122631 | 38.986553  | 22.071716  |
| 1.32E-06   | 6.11E-05   | 28.701344  | 15.780857  | 11.582854 | 35.412846  | 22.90661   |
| 0.00101325 | 0.02399365 | 22.490883  | 15.19105   | 13.64854  | 28.285711  | 22.312706  |
| 0.00202422 | 0.04292156 | 6.060668   | 3.068868   | 8.496261  | 9.126205   | 4.257271   |
| 7.06E-05   | 0.00225286 | 14.399757  | 14.221279  | 8.636911  | 19.17528   | 18.033852  |
| 1.01E-08   | 6.52E-07   | 57.196598  | 24.196224  | 21.972408 | 72.96347   | 36.04258   |
| 3.38E-07   | 1.78E-05   | 11.094255  | 8.163034   | 11.317233 | 16.399235  | 10.966281  |
| 2.81E-08   | 1.73E-06   | 117.670235 | 62.155533  | 53.770714 | 128.635498 | 86.304489  |
| 4.54E-05   | 0.00151803 | 37.004486  | 4.257492   | 7.264698  | 10.134506  | 16.148874  |

|            |            |            |            |            |            |            |
|------------|------------|------------|------------|------------|------------|------------|
| 0.0004858  | 0.0125172  | 23.296577  | 12.657204  | 7.463736   | 28.118637  | 19.969936  |
| 0.00017615 | 0.00517491 | 12.725807  | 4.314741   | 3.576687   | 17.755552  | 6.430355   |
| 1.10E-05   | 0.00042029 | 33.410778  | 17.441885  | 8.540887   | 37.732738  | 32.67712   |
| 4.17E-14   | 5.19E-12   | 270.633453 | 132.446198 | 138.604584 | 372.123016 | 201.093277 |
| 5.38E-06   | 0.00022414 | 40.400177  | 22.595364  | 11.873548  | 49.111843  | 30.520342  |
| 0.00267692 | 0.05446528 | 40.708145  | 19.382351  | 12.878311  | 46.558247  | 25.387671  |
| 3.53E-05   | 0.00119988 | 36.946564  | 12.164984  | 10.50986   | 43.585785  | 20.626535  |
| 0.00554664 | 0.09768432 | 4.735958   | 3.188306   | 3.714521   | 6.482563   | 4.678085   |
| 2.19E-09   | 1.56E-07   | 20.654013  | 9.752419   | 6.060448   | 26.309597  | 13.407107  |
| 1.22E-09   | 9.13E-08   | 44.084644  | 21.670263  | 17.243311  | 52.464073  | 33.659264  |
| 1.48E-05   | 0.00054706 | 21.013145  | 9.874097   | 8.481012   | 28.860432  | 13.027557  |
| 0.0054658  | 0.09707202 | 5.766154   | 1.766849   | 2.053427   | 7.813891   | 2.790229   |
| 0.00037888 | 0.01007183 | 13.692698  | 4.225606   | 1.024773   | 18.167919  | 5.519726   |
| 0.00021504 | 0.00610362 | 7.729666   | 4.067911   | 1.995588   | 8.520368   | 7.171783   |
| 0.00010952 | 0.00336702 | 30.86718   | 10.960543  | 7.916083   | 34.791565  | 15.243909  |
| 6.28E-06   | 0.00025389 | 25.641663  | 11.335258  | 7.55216    | 29.966131  | 17.849335  |
| 1.18E-12   | 1.28E-10   | 120.227951 | 45.625248  | 36.549984  | 151.802429 | 71.294235  |
| 1.34E-07   | 7.52E-06   | 38.68327   | 13.002236  | 14.037943  | 44.90667   | 19.971531  |
| 1.26E-14   | 1.65E-12   | 87.959061  | 80.663857  | 80.534225  | 132.277222 | 97.246277  |
| 1.68E-06   | 7.67E-05   | 12.93841   | 9.892714   | 7.433272   | 19.064714  | 15.388836  |
| 1.55E-18   | 3.14E-16   | 151.095154 | 97.140877  | 72.936279  | 219.475449 | 112.812378 |
| 2.20E-08   | 1.37E-06   | 44.963017  | 15.7409    | 11.60483   | 55.313953  | 24.970249  |
| 7.39E-09   | 5.00E-07   | 35.041256  | 16.684896  | 14.090459  | 45.971493  | 23.864008  |
| 8.98E-14   | 1.07E-11   | 412.459991 | 204.934402 | 140.597137 | 529.525879 | 329.442657 |
| 0.00132998 | 0.03024073 | 7.400525   | 4.347317   | 3.679835   | 10.358217  | 7.06466    |
| 4.91E-05   | 0.00162388 | 3.504786   | 2.644912   | 2.442521   | 5.036319   | 3.645811   |
| 1.05E-06   | 5.02E-05   | 58.420074  | 22.193903  | 14.014111  | 76.199936  | 37.822075  |
| 0.00191983 | 0.0412648  | 10.168333  | 4.716145   | 1.585985   | 13.36129   | 6.417599   |
| 2.95E-06   | 0.00012689 | 17.607971  | 9.392167   | 8.488135   | 21.122778  | 17.226856  |
| 6.75E-11   | 5.78E-09   | 44.831852  | 27.012651  | 11.525672  | 59.649773  | 42.486324  |
| 0.00064366 | 0.01605834 | 13.577684  | 4.758757   | 4.488941   | 17.694473  | 8.211723   |
| 0.00011149 | 0.00341931 | 34.982243  | 53.459972  | 37.777264  | 68.485207  | 59.82682   |
| 7.61E-09   | 5.12E-07   | 22.906105  | 11.081742  | 7.161461   | 33.138618  | 17.280832  |
| 2.40E-15   | 3.32E-13   | 152.769928 | 64.023674  | 49.805866  | 202.597305 | 99.021576  |
| 0.00082224 | 0.01988247 | 9.507251   | 4.432718   | 2.672778   | 12.140558  | 7.638731   |
| 2.28E-11   | 2.09E-09   | 49.559189  | 18.628723  | 17.281115  | 64.020065  | 30.762373  |
| 2.82E-09   | 1.98E-07   | 50.168674  | 20.942547  | 13.128277  | 63.924755  | 28.230268  |
| 2.47E-07   | 1.33E-05   | 27.492428  | 15.130637  | 9.322615   | 40.102989  | 21.164066  |
| 0.00013418 | 0.00404586 | 11.073249  | 11.496681  | 8.868849   | 14.004984  | 17.673006  |
| 0.00010842 | 0.00334122 | 19.878233  | 9.779852   | 5.499033   | 22.897335  | 16.433426  |
| 1.79E-05   | 0.00064583 | 9.451321   | 6.331061   | 6.399583   | 12.899434  | 8.762136   |

|            |            |            |            |            |            |            |
|------------|------------|------------|------------|------------|------------|------------|
| 0.00128273 | 0.02932564 | 10.807264  | 4.711902   | 3.401555   | 12.682147  | 8.181307   |
| 0.00063173 | 0.01579188 | 13.038116  | 5.310576   | 4.519599   | 16.988775  | 9.380632   |
| 0.0004472  | 0.01169031 | 16.472692  | 6.479285   | 5.608748   | 23.501812  | 7.422726   |
| 0.00014733 | 0.00438975 | 8.517488   | 4.541031   | 2.840792   | 12.215595  | 7.926123   |
| 4.25E-06   | 0.00018047 | 9.068924   | 7.731178   | 5.676285   | 11.698598  | 12.465224  |
| 5.40E-05   | 0.00177864 | 12.925938  | 7.829702   | 6.154338   | 16.654799  | 14.984503  |
| 4.67E-13   | 5.39E-11   | 30.85113   | 19.703873  | 12.66342   | 46.572453  | 28.363117  |
| 1.15E-09   | 8.64E-08   | 82.216896  | 37.774712  | 26.085949  | 81.582947  | 60.203571  |
| 2.41E-06   | 0.00010664 | 22.450323  | 10.086897  | 13.717253  | 27.40304   | 15.491255  |
| 4.75E-07   | 2.43E-05   | 1.423122   | 0.687486   | 0.350835   | 1.835391   | 1.256924   |
| 0.00011529 | 0.00352726 | 29.340275  | 7.391354   | 6.857427   | 34.669224  | 12.108253  |
| 5.58E-05   | 0.00182375 | 15.721547  | 5.126467   | 5.941624   | 20.973616  | 8.279234   |
| 0.00019076 | 0.00553966 | 10.118042  | 4.791718   | 3.21414    | 17.486364  | 7.595391   |
| 4.00E-09   | 2.78E-07   | 42.132103  | 21.187004  | 11.69814   | 65.633911  | 29.217735  |
| 2.08E-06   | 9.35E-05   | 22.534706  | 10.601839  | 12.992604  | 28.850479  | 19.471756  |
| 0.00043843 | 0.0114851  | 17.305138  | 10.706238  | 5.007376   | 21.106462  | 13.77323   |
| 4.81E-13   | 5.45E-11   | 19.313477  | 11.249804  | 7.084474   | 28.572954  | 18.484756  |
| 4.83E-07   | 2.46E-05   | 60.922283  | 23.203491  | 14.005803  | 76.144272  | 41.466633  |
| 0.0034063  | 0.06650754 | 19.577757  | 7.271108   | 4.254276   | 21.188587  | 13.003745  |
| 0.00051674 | 0.01320622 | 23.866505  | 5.220769   | 4.781307   | 13.6591    | 5.046738   |
| 5.54E-06   | 0.00022915 | 5.360252   | 4.209801   | 5.482024   | 8.66908    | 5.686757   |
| 7.78E-05   | 0.00246306 | 10.879086  | 5.8439     | 3.738385   | 12.811589  | 9.607725   |
| 0.00048289 | 0.0124925  | 15.019442  | 5.12728    | 3.022523   | 16.563572  | 8.673716   |
| 0.0048155  | 0.08776746 | 5.6021     | 1.074003   | 2.644807   | 6.722345   | 1.990387   |
| 1.96E-07   | 1.07E-05   | 22.071146  | 9.74529    | 6.356802   | 32.129436  | 15.814837  |
| 0.00289952 | 0.05833371 | 8.264688   | 3.319001   | 2.047109   | 11.132478  | 3.739684   |
| 0.00011634 | 0.00354212 | 9.488181   | 5.680942   | 4.517607   | 14.974298  | 8.900689   |
| 2.94E-08   | 1.79E-06   | 9.304976   | 4.702135   | 4.132645   | 14.967678  | 7.840511   |
| 2.34E-12   | 2.43E-10   | 446.602386 | 128.469528 | 108.815132 | 582.008545 | 250.320099 |
| 6.90E-05   | 0.0022092  | 29.451334  | 4.125501   | 4.412873   | 37.761589  | 5.796087   |
| 1.12E-26   | 4.25E-24   | 257.816986 | 123.687439 | 89.732964  | 394.399384 | 187.673935 |
| 5.57E-08   | 3.29E-06   | 33.465401  | 9.59294    | 10.956002  | 42.373562  | 17.61515   |
| 4.05E-15   | 5.48E-13   | 375.560974 | 127.398308 | 87.699249  | 490.180328 | 219.971954 |
| 1.72E-14   | 2.21E-12   | 70.549049  | 31.023788  | 32.772102  | 104.385277 | 53.886272  |
| 2.15E-18   | 4.04E-16   | 49.871956  | 23.325233  | 19.488977  | 79.179062  | 37.206181  |
| 0.00088192 | 0.02108217 | 10.151242  | 3.326053   | 2.558881   | 10.729216  | 6.484949   |
| 4.59E-08   | 2.75E-06   | 10.298896  | 7.418569   | 4.757959   | 16.195885  | 11.253874  |
| 2.22E-09   | 1.57E-07   | 35.486885  | 13.222079  | 8.780432   | 46.91066   | 25.938076  |
| 0.00310311 | 0.06173819 | 3.158617   | 2.192699   | 1.938743   | 4.384751   | 2.774221   |
| 6.09E-07   | 3.03E-05   | 73.457138  | 23.291689  | 21.290115  | 83.531609  | 47.562378  |
| 7.67E-05   | 0.00243613 | 10.580914  | 5.056904   | 3.213423   | 12.309789  | 9.619408   |

|            |            |            |            |           |            |            |
|------------|------------|------------|------------|-----------|------------|------------|
| 0.00346746 | 0.06749191 | 4.697586   | 2.28322    | 1.078876  | 6.676117   | 3.450697   |
| 6.02E-05   | 0.00193754 | 14.714335  | 8.825626   | 3.787309  | 20.593746  | 12.960059  |
| 0.00427619 | 0.08025203 | 10.853555  | 3.905947   | 3.723645  | 13.21589   | 6.807716   |
| 0.00523967 | 0.09382627 | 2.547204   | 0.792359   | 1.039177  | 3.997714   | 1.537781   |
| 1.98E-06   | 8.96E-05   | 18.595922  | 8.054457   | 6.120256  | 28.716822  | 14.03188   |
| 0.00353159 | 0.06852802 | 3.625351   | 1.771593   | 1.565542  | 5.727759   | 3.006322   |
| 8.10E-07   | 3.95E-05   | 20.087276  | 7.343186   | 3.539024  | 25.607857  | 4.643492   |
| 1.96E-06   | 8.92E-05   | 14.406204  | 8.256267   | 5.71309   | 18.896646  | 14.891044  |
| 7.58E-07   | 3.74E-05   | 60.182579  | 17.164259  | 12.881391 | 71.327675  | 33.996689  |
| 0.00043592 | 0.01144311 | 12.627894  | 4.287443   | 3.494211  | 13.272538  | 6.464756   |
| 8.79E-13   | 9.78E-11   | 52.324986  | 30.996588  | 21.704096 | 88.387024  | 36.316257  |
| 1.09E-06   | 5.13E-05   | 4.584492   | 1.855415   | 0.797873  | 6.960298   | 4.858122   |
| 1.06E-05   | 0.00040737 | 26.03422   | 6.716547   | 11.708959 | 32.366409  | 14.481502  |
| 9.21E-11   | 7.67E-09   | 62.403828  | 22.790754  | 14.702296 | 78.16819   | 40.448685  |
| 3.99E-06   | 0.00016989 | 17.921894  | 6.290874   | 3.618725  | 25.68589   | 9.442836   |
| 1.05E-12   | 1.15E-10   | 1673.80725 | 531.742798 | 360.4552  | 2032.65649 | 994.151978 |
| 2.59E-05   | 0.00091354 | 12.007065  | 4.771953   | 4.569728  | 16.735134  | 9.433641   |
| 5.90E-05   | 0.00190411 | 9.922321   | 5.510655   | 2.976106  | 12.568743  | 9.485626   |
| 4.62E-06   | 0.00019483 | 9.490991   | 4.419496   | 2.960491  | 13.008122  | 6.786212   |
| 0.00169664 | 0.03729643 | 6.90619    | 2.786328   | 1.378815  | 8.695122   | 5.868134   |
| 8.02E-07   | 3.93E-05   | 19.48687   | 9.167953   | 8.330465  | 28.888807  | 13.297338  |
| 1.42E-24   | 4.97E-22   | 128.505219 | 58.074081  | 39.22937  | 193.039825 | 93.367973  |
| 0.00061013 | 0.01534362 | 8.153169   | 4.68668    | 3.166862  | 9.006024   | 11.618492  |
| 1.04E-12   | 1.14E-10   | 37.43063   | 21.538284  | 13.727427 | 56.4272    | 35.100517  |
| 2.33E-05   | 0.00082646 | 8.113186   | 3.311464   | 1.71781   | 14.269834  | 8.387824   |
| 2.49E-06   | 0.00011002 | 22.436266  | 9.051342   | 5.942402  | 28.287498  | 18.40707   |
| 1.67E-11   | 1.57E-09   | 38.129436  | 9.231434   | 9.243606  | 67.790764  | 16.71019   |
| 1.51E-11   | 1.42E-09   | 17.671604  | 10.225944  | 6.557621  | 29.245121  | 18.557985  |
| 1.90E-17   | 3.28E-15   | 48.983128  | 23.225992  | 29.078901 | 74.883987  | 41.142723  |
| 1.65E-06   | 7.57E-05   | 19.644848  | 9.397483   | 5.89863   | 24.834393  | 20.739864  |
| 6.26E-17   | 1.02E-14   | 96.453819  | 31.681551  | 24.116255 | 133.528122 | 56.044445  |
| 1.05E-07   | 6.02E-06   | 23.07185   | 8.23211    | 6.175369  | 30.227228  | 14.648161  |
| 7.57E-11   | 6.39E-09   | 21.423677  | 9.994983   | 5.998736  | 31.694807  | 16.38232   |
| 0.00399299 | 0.07584265 | 4.789168   | 4.429714   | 1.067887  | 6.236103   | 6.036646   |
| 5.30E-17   | 8.77E-15   | 68.667992  | 34.300598  | 19.80245  | 111.850319 | 61.777088  |
| 8.63E-05   | 0.00269995 | 7.805071   | 5.938585   | 2.610264  | 14.142652  | 6.929904   |
| 0.00179339 | 0.0390815  | 4.340369   | 2.312824   | 2.278741  | 11.415409  | 4.221559   |
| 3.94E-07   | 2.06E-05   | 7.75418    | 3.015068   | 3.438896  | 11.496092  | 5.48407    |
| 1.22E-05   | 0.00045959 | 16.896421  | 7.0413     | 6.062408  | 21.78487   | 10.673482  |
| 4.68E-18   | 8.54E-16   | 414.986603 | 175.353653 | 95.770424 | 568.331726 | 318.993378 |
| 0.00061344 | 0.01539601 | 11.619822  | 4.180562   | 6.592209  | 21.524273  | 7.465819   |

|            |            |            |           |           |            |            |
|------------|------------|------------|-----------|-----------|------------|------------|
| 1.64E-17   | 2.87E-15   | 217.373627 | 78.698174 | 59.466888 | 299.167694 | 144.923035 |
| 9.68E-14   | 1.15E-11   | 62.450272  | 20.54147  | 12.16291  | 91.012192  | 37.39851   |
| 6.86E-11   | 5.83E-09   | 37.36908   | 15.386559 | 10.017706 | 52.265701  | 30.503719  |
| 3.06E-11   | 2.79E-09   | 14.917938  | 6.196697  | 4.566401  | 22.833994  | 10.551253  |
| 1.65E-15   | 2.36E-13   | 27.022947  | 9.154653  | 8.510962  | 41.965977  | 15.358055  |
| 3.36E-12   | 3.44E-10   | 29.765507  | 13.18195  | 9.510623  | 42.150875  | 25.22673   |
| 0.00249297 | 0.05121983 | 81.825348  | 17.202063 | 14.153851 | 58.61969   | 35.812988  |
| 0.00037219 | 0.00991513 | 8.625531   | 4.091014  | 4.521041  | 13.233944  | 10.018041  |
| 1.65E-18   | 3.29E-16   | 39.195435  | 14.184691 | 9.368453  | 59.962482  | 24.76399   |
| 4.57E-05   | 0.00152387 | 12.568339  | 5.584595  | 2.82747   | 18.625469  | 9.039265   |
| 0.00459171 | 0.08503112 | 0.185333   | 0.075217  | 0.073378  | 0.461255   | 0.329039   |
| 0.00504725 | 0.09093367 | 6.858247   | 2.056852  | 1.365958  | 10.434148  | 3.623323   |
| 1.63E-09   | 1.18E-07   | 33.246952  | 12.279695 | 10.367389 | 47.459255  | 26.362267  |
| 0.00065546 | 0.0163203  | 1.291851   | 2.764374  | 2.570464  | 3.252408   | 2.449292   |
| 0.00033109 | 0.00899155 | 6.345232   | 4.716767  | 4.397109  | 9.093735   | 7.907157   |
| 1.46E-05   | 0.00053938 | 76.583336  | 32.28709  | 16.980347 | 102.399582 | 64.941895  |
| 1.47E-07   | 8.22E-06   | 32.84726   | 8.984314  | 9.048046  | 49.452572  | 17.497765  |
| 0.00374349 | 0.07208361 | 4.681345   | 2.068735  | 1.405106  | 7.023415   | 3.840095   |
| 3.92E-20   | 9.48E-18   | 151.304153 | 89.31739  | 52.431561 | 222.425018 | 174.838623 |
| 2.04E-15   | 2.88E-13   | 8.99523    | 4.552646  | 3.67674   | 14.608782  | 8.487671   |
| 0.00021896 | 0.00617467 | 0.336491   | 0.29903   | 0.297547  | 0.229634   | 0.123805   |
| 1.21E-14   | 1.60E-12   | 16.60783   | 6.831306  | 4.600791  | 24.930918  | 12.90118   |
| 1.29E-19   | 3.06E-17   | 77.535149  | 26.290508 | 24.660686 | 127.530716 | 60.057846  |
| 1.01E-05   | 0.00038877 | 20.971041  | 5.388532  | 4.899027  | 29.391544  | 10.53955   |
| 1.42E-09   | 1.04E-07   | 48.284447  | 9.329535  | 7.437419  | 67.297264  | 15.316224  |
| 8.94E-09   | 5.88E-07   | 12.51013   | 5.209164  | 3.799688  | 18.011292  | 11.006105  |
| 0.00021902 | 0.00617467 | 6.774172   | 1.638329  | 1.790239  | 9.765487   | 2.979125   |
| 3.86E-05   | 0.00130701 | 12.149497  | 7.185487  | 4.726742  | 18.830154  | 11.74895   |
| 0.00014055 | 0.00421788 | 4.275541   | 1.901688  | 1.321933  | 6.337464   | 2.935985   |
| 3.90E-06   | 0.00016674 | 7.614744   | 3.659859  | 1.454729  | 11.117521  | 8.378711   |
| 3.18E-16   | 4.76E-14   | 91.14357   | 31.605516 | 22.99716  | 123.572319 | 68.989799  |
| 7.48E-08   | 4.33E-06   | 41.311741  | 9.636903  | 6.309594  | 51.943962  | 19.398214  |
| 9.64E-06   | 0.00037281 | 18.899492  | 7.657016  | 3.725344  | 25.012094  | 15.175695  |
| 8.17E-26   | 2.94E-23   | 216.504135 | 77.031616 | 41.841976 | 333.668732 | 153.109833 |
| 2.43E-10   | 1.96E-08   | 18.79352   | 5.437599  | 4.97648   | 26.731499  | 11.454741  |
| 1.81E-05   | 0.00065194 | 31.93519   | 12.931266 | 9.284376  | 41.034943  | 30.740482  |
| 4.31E-11   | 3.82E-09   | 64.149437  | 15.173704 | 14.912354 | 85.455444  | 29.571712  |
| 1.41E-18   | 2.90E-16   | 70.304672  | 33.689899 | 22.978197 | 111.528229 | 73.382629  |
| 3.98E-21   | 1.07E-18   | 178.903305 | 60.47916  | 39.791859 | 257.32666  | 117.391777 |
| 9.50E-06   | 0.00036985 | 14.709205  | 6.131066  | 4.954672  | 21.181572  | 13.800945  |
| 6.14E-12   | 6.08E-10   | 50.83004   | 13.802114 | 9.646425  | 64.273895  | 25.42766   |



|            |            |            |            |           |            |            |
|------------|------------|------------|------------|-----------|------------|------------|
| 3.32E-29   | 1.55E-26   | 55.789639  | 23.88365   | 23.08536  | 84.555374  | 46.23917   |
| 9.87E-07   | 4.75E-05   | 9.681375   | 3.287649   | 2.230871  | 13.971775  | 7.117059   |
| 2.25E-16   | 3.44E-14   | 121.270462 | 53.187828  | 30.693338 | 166.028137 | 110.089012 |
| 6.52E-06   | 0.00026288 | 9.985525   | 4.565906   | 3.548606  | 17.189949  | 7.559716   |
| 1.62E-13   | 1.90E-11   | 43.759377  | 18.033482  | 9.030425  | 63.016708  | 35.176205  |
| 2.56E-15   | 3.49E-13   | 133.090057 | 41.728886  | 27.059326 | 197.937637 | 84.538307  |
| 1.08E-06   | 5.10E-05   | 22.088285  | 8.123282   | 7.441358  | 30.923943  | 17.583204  |
| 1.46E-28   | 6.57E-26   | 246.748505 | 90.473259  | 81.019737 | 384.291382 | 169.864471 |
| 0.00251996 | 0.05165614 | 13.8064    | 11.29898   | 4.616477  | 32.400188  | 20.021887  |
| 3.30E-08   | 2.00E-06   | 23.226168  | 7.643572   | 6.55461   | 32.634655  | 13.661375  |
| 0.00066802 | 0.01660026 | 110.858696 | 63.859177  | 30.966427 | 137.081299 | 143.149139 |
| 4.46E-07   | 2.29E-05   | 19.186953  | 7.165602   | 4.124245  | 27.382801  | 14.04714   |
| 5.19E-07   | 2.62E-05   | 8.827583   | 3.539443   | 2.780261  | 13.122032  | 8.393767   |
| 0.00284205 | 0.05736096 | 43.245079  | 10.015987  | 8.631713  | 53.312904  | 18.745327  |
| 0.00088727 | 0.02116985 | 6.18553    | 2.37472    | 0.959068  | 8.689301   | 4.765977   |
| 0.0016337  | 0.03610216 | 4.481355   | 1.231137   | 0.738405  | 6.12592    | 2.600563   |
| 8.39E-14   | 1.01E-11   | 38.699844  | 15.518389  | 11.514657 | 58.796989  | 35.499237  |
| 0.00153168 | 0.03414779 | 225.363235 | 162.402679 | 76.113068 | 314.934814 | 390.9198   |
| 0.00554689 | 0.09768432 | 1.996054   | 1.409163   | 1.350673  | 2.902446   | 3.41682    |
| 1.53E-21   | 4.19E-19   | 67.870674  | 20.454802  | 18.162981 | 113.398117 | 35.179161  |
| 0.00223348 | 0.04667965 | 3.944456   | 1.288601   | 1.205901  | 5.033942   | 2.805555   |
| 9.24E-16   | 1.37E-13   | 87.619392  | 24.39362   | 22.802364 | 120.5765   | 50.076492  |
| 0.00058559 | 0.01481525 | 2.422613   | 0.420394   | 1.308666  | 2.838339   | 0.294268   |
| 2.18E-09   | 1.56E-07   | 19.628445  | 7.102066   | 5.660507  | 26.864269  | 16.988617  |
| 0.00369202 | 0.07142074 | 47.474678  | 13.594814  | 9.549574  | 49.034573  | 14.395767  |
| 1.25E-23   | 4.14E-21   | 147.33728  | 48.428051  | 32.99844  | 216.347168 | 93.475311  |
| 1.05E-05   | 0.00040279 | 5.728992   | 2.248572   | 1.56718   | 8.90016    | 3.913258   |
| 1.81E-07   | 9.96E-06   | 23.363142  | 29.799715  | 21.225288 | 62.513699  | 44.667774  |
| 6.55E-06   | 0.00026293 | 8.806574   | 3.221042   | 2.210446  | 12.491999  | 6.543892   |
| 9.62E-06   | 0.00037281 | 5.565951   | 1.917712   | 1.959378  | 9.969328   | 3.744089   |
| 5.69E-06   | 0.00023371 | 5.835539   | 1.118269   | 0.825152  | 7.434      | 2.082036   |
| 7.18E-09   | 4.88E-07   | 14.797611  | 4.616798   | 3.22646   | 25.217459  | 10.648892  |
| 2.43E-12   | 2.51E-10   | 19.091564  | 7.461126   | 6.054692  | 37.526585  | 15.90179   |
| 1.82E-11   | 1.69E-09   | 23.886539  | 9.596879   | 5.235094  | 35.60989   | 17.044094  |
| 5.36E-07   | 2.70E-05   | 250.270706 | 83.794807  | 53.38913  | 394.037811 | 148.886765 |
| 3.77E-08   | 2.27E-06   | 23.141352  | 7.75771    | 4.368424  | 30.133327  | 17.303747  |
| 4.68E-18   | 8.54E-16   | 28.894283  | 11.844912  | 6.799821  | 44.208176  | 22.73978   |
| 1.48E-08   | 9.31E-07   | 475.13916  | 224.354538 | 168.1548  | 737.497009 | 465.729095 |
| 8.20E-17   | 1.29E-14   | 82.209503  | 30.271425  | 22.55015  | 118.198067 | 66.420517  |
| 4.21E-12   | 4.27E-10   | 44.827751  | 8.803934   | 12.32225  | 70.466354  | 34.642502  |
| 2.36E-15   | 3.30E-13   | 23.556604  | 10.009254  | 6.222497  | 33.997993  | 22.220158  |

|            |            |            |            |            |            |            |
|------------|------------|------------|------------|------------|------------|------------|
| 8.93E-06   | 0.00035102 | 16.963837  | 4.809845   | 2.868045   | 25.895123  | 11.637812  |
| 4.05E-27   | 1.59E-24   | 94.438553  | 52.820251  | 27.081106  | 152.200027 | 104.1689   |
| 0.00029283 | 0.0080569  | 25.231352  | 8.139767   | 5.679873   | 33.739079  | 18.684788  |
| 2.26E-33   | 1.29E-30   | 1037.36816 | 557.735352 | 276.675812 | 1636.00085 | 1191.12195 |
| 2.83E-08   | 1.74E-06   | 28.840424  | 22.360991  | 15.221982  | 35.928413  | 56.074181  |
| 6.98E-12   | 6.85E-10   | 6.332758   | 2.731463   | 1.875613   | 10.139509  | 6.601178   |
| 1.63E-06   | 7.51E-05   | 578.934631 | 211.615616 | 126.868484 | 827.480835 | 468.580597 |
| 0.0008642  | 0.0207772  | 10.287397  | 2.658639   | 2.129616   | 16.422543  | 5.363435   |
| 1.41E-22   | 4.04E-20   | 59.318481  | 14.647847  | 12.341655  | 92.388931  | 28.80657   |
| 0.00157697 | 0.03503326 | 3.1583     | 1.303973   | 1.532018   | 5.967717   | 2.447011   |
| 0.00015772 | 0.00466616 | 333.561401 | 155.269135 | 107.695076 | 538.830078 | 320.594055 |
| 0.00046331 | 0.01206147 | 159.202545 | 100.64299  | 36.787495  | 206.181793 | 246.83725  |
| 7.92E-07   | 3.89E-05   | 789.693359 | 357.069916 | 178.535721 | 1149.1272  | 801.029297 |
| 7.30E-12   | 7.06E-10   | 14.288434  | 6.995771   | 3.110993   | 27.36458   | 10.470715  |
| 1.99E-19   | 4.54E-17   | 28.862015  | 10.216876  | 6.223333   | 45.356834  | 21.587555  |
| 1.46E-12   | 1.57E-10   | 24.071253  | 9.515294   | 5.114108   | 38.539906  | 23.261339  |
| 4.18E-30   | 2.10E-27   | 878.355103 | 409.1539   | 245.415619 | 1411.9032  | 878.549622 |
| 1.28E-15   | 1.87E-13   | 58.038536  | 20.841223  | 12.052162  | 90.259979  | 41.361275  |
| 0.00019925 | 0.00573322 | 3.45224    | 1.066804   | 0.644741   | 5.650465   | 1.714418   |
| 4.74E-13   | 5.42E-11   | 20.277777  | 9.302938   | 6.904214   | 29.20583   | 22.495434  |
| 1.20E-07   | 6.76E-06   | 34.365566  | 10.237915  | 6.002013   | 45.078918  | 24.411791  |
| 0.00148147 | 0.03314579 | 308.944    | 59.021877  | 43.213753  | 384.230164 | 123.714157 |
| 6.59E-11   | 5.67E-09   | 15.228608  | 6.372143   | 3.802707   | 25.982603  | 14.151412  |
| 1.20E-06   | 5.59E-05   | 5.145543   | 3.806874   | 3.65603    | 7.975471   | 8.575271   |
| 1.55E-23   | 4.99E-21   | 56.811584  | 21.883205  | 9.364508   | 102.68766  | 44.822681  |
| 3.96E-07   | 2.06E-05   | 110.330101 | 41.406796  | 24.71142   | 158.703995 | 44.837486  |
| 1.51E-05   | 0.00055273 | 6.753568   | 3.112998   | 2.248956   | 8.253141   | 8.762053   |
| 5.37E-10   | 4.20E-08   | 30.834978  | 9.57822    | 5.978577   | 56.054092  | 16.633289  |
| 6.22E-14   | 7.66E-12   | 28.935076  | 11.206729  | 4.915033   | 48.502621  | 23.18561   |
| 1.19E-11   | 1.14E-09   | 14.367599  | 4.698394   | 3.800149   | 23.638435  | 10.636757  |
| 8.30E-05   | 0.0026082  | 60.837791  | 10.742002  | 9.656898   | 85.008522  | 25.172205  |
| 1.56E-09   | 1.13E-07   | 1234.70483 | 479.976135 | 261.333984 | 1917.6604  | 1091.69885 |
| 6.65E-05   | 0.00213218 | 112.120827 | 62.892742  | 38.245754  | 198.897034 | 96.83979   |
| 2.72E-27   | 1.13E-24   | 67.566566  | 30.647545  | 17.39551   | 110.892227 | 67.79705   |
| 2.57E-20   | 6.34E-18   | 97.321335  | 41.168095  | 21.928461  | 158.983047 | 102.750099 |
| 0.00524574 | 0.09382627 | 12.828161  | 7.40486    | 2.183812   | 15.20546   | 20.688988  |
| 5.03E-22   | 1.41E-19   | 81.446297  | 35.609177  | 18.827063  | 140.354645 | 75.999001  |
| 1.83E-39   | 1.28E-36   | 1494.63525 | 613.920898 | 351.681519 | 2517.40601 | 1372.86939 |
| 1.18E-07   | 6.70E-06   | 3.452416   | 1.548444   | 1.000721   | 4.35817    | 4.461575   |
| 0.00106075 | 0.02488406 | 144.196304 | 50.621078  | 30.194283  | 204.571381 | 106.534729 |
| 1.38E-05   | 0.00051357 | 4463.13525 | 1202.22168 | 768.255493 | 6405.69092 | 2793.67407 |

|            |            |            |            |            |            |            |
|------------|------------|------------|------------|------------|------------|------------|
| 1.05E-18   | 2.20E-16   | 16.06492   | 4.256788   | 3.845244   | 30.610537  | 11.993258  |
| 0.00462854 | 0.0853362  | 1.593488   | 0.375036   | 0.345543   | 2.56699    | 1.219875   |
| 2.82E-06   | 0.00012294 | 116.775551 | 34.04575   | 20.270189  | 184.086853 | 69.993736  |
| 6.03E-54   | 6.90E-51   | 194.517288 | 121.933998 | 58.848019  | 351.456238 | 268.824768 |
| 6.04E-06   | 0.0002459  | 4.441146   | 1.254501   | 0.460454   | 9.39726    | 2.683526   |
| 4.09E-17   | 6.87E-15   | 26.837872  | 7.348808   | 3.594638   | 44.595646  | 16.815805  |
| 2.48E-16   | 3.75E-14   | 51.80595   | 22.223835  | 11.139117  | 88.442917  | 45.054161  |
| 4.71E-50   | 4.56E-47   | 47.588173  | 24.680218  | 14.311269  | 105.981476 | 48.51202   |
| 3.98E-05   | 0.0013446  | 4.319515   | 1.490496   | 0.716235   | 5.93342    | 3.956877   |
| 5.13E-10   | 4.04E-08   | 18.625542  | 9.004163   | 5.327823   | 31.694809  | 19.350811  |
| 1.72E-05   | 0.00062522 | 8.952232   | 2.150342   | 1.264912   | 13.239832  | 4.927582   |
| 5.63E-34   | 3.37E-31   | 264.177124 | 73.610016  | 60.347095  | 468.238373 | 161.782867 |
| 5.32E-08   | 3.17E-06   | 11.256489  | 4.298657   | 2.675735   | 19.830095  | 9.2094     |
| 4.25E-05   | 0.00142898 | 5.585059   | 2.805456   | 1.444642   | 8.484586   | 4.285477   |
| 1.40E-27   | 6.07E-25   | 77.644279  | 34.619976  | 17.959578  | 129.174316 | 74.894539  |
| 1.07E-09   | 8.19E-08   | 5.093842   | 1.244462   | 1.078129   | 7.887364   | 3.416632   |
| 6.67E-06   | 0.00026694 | 5.274495   | 5.450318   | 3.812745   | 8.409285   | 15.606937  |
| 1.47E-26   | 5.43E-24   | 60.494682  | 27.320465  | 15.518476  | 109.963547 | 71.640991  |
| 0.00481625 | 0.08776746 | 263.351654 | 71.633301  | 45.10833   | 337.700958 | 162.82106  |
| 5.10E-21   | 1.34E-18   | 85.01783   | 24.629259  | 18.258324  | 147.597244 | 55.238159  |
| 0.00107711 | 0.025095   | 93.86824   | 18.327665  | 14.976843  | 125.832428 | 41.556465  |
| 0.0004628  | 0.01206147 | 2.25346    | 0.626852   | 0.481519   | 2.973275   | 1.646724   |
| 0.00308736 | 0.06171384 | 1.082012   | 0.164078   | 0.278081   | 2.301674   | 0.630954   |
| 7.55E-05   | 0.00240298 | 100.718216 | 27.225853  | 17.90748   | 144.087097 | 69.493683  |
| 3.08E-23   | 9.69E-21   | 57.217495  | 18.448046  | 9.700608   | 96.885826  | 40.02121   |
| 1.01E-08   | 6.52E-07   | 6333.93408 | 1683.53479 | 1133.87415 | 9258.75    | 3759.98926 |
| 3.21E-11   | 2.90E-09   | 15.256292  | 2.705828   | 2.795832   | 24.35659   | 6.979516   |
| 6.85E-17   | 1.09E-14   | 38.392742  | 21.171547  | 17.888145  | 83.396378  | 44.300236  |
| 4.91E-11   | 4.31E-09   | 14.545247  | 4.210836   | 2.750876   | 26.823109  | 9.300088   |
| 1.63E-10   | 1.34E-08   | 8.193779   | 2.230846   | 2.026899   | 14.632581  | 5.712468   |
| 1.16E-63   | 1.82E-60   | 58.557133  | 14.439253  | 35.525482  | 121.351692 | 32.339172  |
| 2.22E-05   | 0.00078879 | 80.990234  | 24.233906  | 15.605728  | 124.50148  | 66.12606   |
| 1.74E-39   | 1.28E-36   | 57.653587  | 28.093201  | 12.700623  | 116.968407 | 63.021389  |
| 4.32E-10   | 3.44E-08   | 16.499331  | 7.679677   | 5.906085   | 29.391342  | 16.226679  |
| 0.0039928  | 0.07584265 | 1.772248   | 0.442085   | 0.448718   | 2.687351   | 1.457184   |
| 3.40E-19   | 7.51E-17   | 41.974617  | 11.485475  | 8.544972   | 66.307091  | 31.637207  |
| 0.00139008 | 0.03143675 | 1.158234   | 0.745427   | 0.827614   | 3.321393   | 1.791986   |
| 1.17E-16   | 1.82E-14   | 27.052862  | 5.880829   | 3.829768   | 44.580585  | 15.656446  |
| 0.00192639 | 0.04133518 | 7.348583   | 0.628473   | 1.915938   | 15.025832  | 0.65932    |
| 2.83E-10   | 2.27E-08   | 373.134399 | 103.627464 | 65.478615  | 671.282166 | 251.792099 |
| 5.52E-23   | 1.65E-20   | 23.97403   | 11.680884  | 5.552815   | 49.826672  | 27.48831   |

|            |            |            |            |            |            |            |
|------------|------------|------------|------------|------------|------------|------------|
| 1.12E-09   | 8.48E-08   | 4.386229   | 2.646725   | 1.204233   | 9.864911   | 5.641034   |
| 2.09E-05   | 0.00074409 | 84.89949   | 21.626585  | 12.516848  | 136.193573 | 55.56282   |
| 1.69E-13   | 1.97E-11   | 141.887329 | 77.56147   | 34.123291  | 231.307144 | 190.45993  |
| 0.00051474 | 0.01318203 | 231.969559 | 45.204597  | 31.617828  | 339.913879 | 111.167183 |
| 0.00159161 | 0.03529604 | 5.539567   | 0.724708   | 0.558163   | 8.030198   | 2.402089   |
| 7.05E-63   | 9.85E-60   | 632.7854   | 204.671448 | 126.098549 | 1353.82739 | 481.143097 |
| 0.00020089 | 0.00576704 | 1150.3064  | 201.338257 | 117.179573 | 1752.20117 | 537.642761 |
| 1.39E-74   | 3.50E-71   | 208.09256  | 71.804993  | 41.910488  | 483.024902 | 165.547073 |
| 0.00379174 | 0.07267881 | 152.465561 | 27.049606  | 14.328449  | 216.703415 | 66.22435   |
| 1.22E-08   | 7.79E-07   | 71.70253   | 21.384092  | 15.338169  | 133.248154 | 56.212582  |
| 0.0029833  | 0.05982768 | 2.581936   | 0.9755     | 0.268764   | 4.699766   | 3.245557   |
| 0.00079389 | 0.01927106 | 87.948013  | 7.365309   | 15.109151  | 122.014343 | 24.789974  |
| 3.20E-09   | 2.24E-07   | 137.166153 | 33.240993  | 21.804712  | 259.805237 | 93.620018  |
| 8.09E-09   | 5.38E-07   | 16.26932   | 3.886619   | 1.774135   | 27.380312  | 12.672356  |
| 0.0002205  | 0.00620268 | 2.744256   | 0.909967   | 0.317816   | 5.242198   | 3.047606   |
| 0.00236492 | 0.04882834 | 45.818836  | 6.352522   | 4.920615   | 70.915802  | 19.158585  |
| 0.00074272 | 0.01824023 | 0.503217   | 0.468369   | 0.147647   | 0.425473   | 3.894566   |
| 7.20E-07   | 3.57E-05   | 0          | 0          | 0          | 0.763887   | 0          |
| 0.0007814  | 0.01900445 |            |            |            |            |            |

| YFP3_FPKM | BTN top 100 genes (Horie et al. 2018) |
|-----------|---------------------------------------|
| 0.4269    | BTN                                   |
| 0.064452  |                                       |
| 0.618223  | BTN                                   |
| 0         |                                       |
| 0.064239  |                                       |
| 0         |                                       |
| 0.036189  |                                       |
| 1.094882  |                                       |
| 2.14526   | BTN                                   |
| 0.555692  |                                       |
| 2.361225  | BTN                                   |
| 3.64922   |                                       |
| 4.39182   | BTN                                   |
| 13.069991 | BTN                                   |
| 1.358577  |                                       |
| 1.820917  |                                       |
| 0.130073  |                                       |
| 0.233486  |                                       |
| 0.156529  |                                       |
| 3.678198  | BTN                                   |
| 2.116407  | BTN                                   |
| 0.404458  |                                       |
| 15.362522 |                                       |
| 0.720081  |                                       |
| 1.063769  |                                       |
| 0.518999  |                                       |
| 0.253157  | BTN                                   |
| 1.039232  |                                       |
| 0.304317  |                                       |
| 0.33828   |                                       |
| 5.06079   | BTN                                   |
| 3.470272  |                                       |
| 0.535233  |                                       |
| 5.156123  |                                       |
| 12.594046 | BTN                                   |
| 17.676727 |                                       |
| 0.299193  |                                       |
| 0.845076  |                                       |
| 2.269474  |                                       |
| 2.886154  | BTN                                   |

59.663059  
8.02452 **BTN**  
1.123501  
14.581738 **BTN**  
0.854673 **BTN**  
3.40668  
0.490654  
0  
6.868029 **BTN**  
1.89464 **BTN**  
0.397985  
2.625459 **BTN**  
0.440525  
1.144726  
1.347134 **BTN**  
1.070635  
15.028857  
0.480808  
0.843679  
0.517474  
4.768206 **BTN**  
0.51925 **BTN**  
1.233466  
2.030147  
1.853307  
3.331808  
1.117072  
1.883672  
4.730845  
0.307243 **BTN**  
3.112981  
0.965032  
0.771079 **BTN**  
3.22263  
5.442797  
20.118402  
5.44567  
99.162582  
0.185711  
1.953657  
2.889181

2.486743  
0.137559  
4.151878  
4.068905  
0.662202  
2.327996 **BTN**  
10.980041  
13.241982  
0.7514  
1.73257  
22.126627  
0.716855  
2.120662  
6.124271  
3.790757  
2.473031  
13.797625 **BTN**  
0.137358  
42.235714  
3.278187  
3.072356 **BTN**  
1.003122 **BTN**  
3.466915  
3.876513  
2.886063 **BTN**  
4.066764 **BTN**  
16.756647  
5.573811  
1.649585  
4.203743  
3.151648 **BTN**  
3.721382  
22.876215  
11.877222  
2.424391 **BTN**  
2.238864  
1.535919  
5.523682  
7.58582  
12.675631 **BTN**  
10.316846

0.771375  
9.965171  
7.432941  
9.690454  
9.967483  
1.941844  
1.6874  
2.549515  
3.732285  
4.253527  
3.840129  
4.245877  
2.147566  
9.514825  
2.886225  
3.194745  
2.437417  
2.376104  
1.094423  
18.529366  
1.226713  
2.374395  
6.213823  
2.282649  
4.177587  
4.137344  
12.462775 **BTN**  
7.047624  
9.512306  
3.796465  
5.543413  
20.249996  
4.381069  
1.72779  
2.794303  
4.418654  
15.045557  
41.306534  
35.028225  
10.34059  
1.971732



14.781228 **BTN**  
7.199317  
0.838237  
0  
8.587494  
3.113754 **BTN**  
5.732217  
8.60753  
6.789972  
21.865713  
8.287566  
43.397499  
9.35945 **BTN**  
37.532673  
10.881068  
4.649595 **BTN**  
11.856453  
5.756253  
6.641797  
10.65847  
13.655105  
11.12798  
8.27861  
13.501041  
7.316  
19.27803  
23.755451  
4.077026  
10.712828  
2.719922  
7.744735 **BTN**  
267.525208  
19.73374  
8.981953  
11.40051  
9.142957  
16.600508  
0.961188  
6.964539  
17.034056  
33.03289 **BTN**

8.254984  
5.394357  
22.970606  
600.083801  
7.402618  
24.378004  
12.703567  
9.604555  
29.834633 **BTN**  
8.262012  
9.524849  
11.112781 **BTN**  
37.888912  
5.710066  
6.111449  
11.229421  
40.209454  
150.824722  
38.074539  
8.468787  
15.326732  
91.885063  
7.902226  
15.724424  
10.351399  
58.370731  
11.780731  
11.593454  
59.014084  
14.122802  
422.309509  
18.599146  
20.999695  
12.384463  
34.69603  
12.405916  
30.23896  
10.252337  
49.848942  
15.795087  
36.607689

69.305054  
16.256817  
124.298828  
15.778762  
16.738028  
99.403374  
29.154562  
12.175045  
33.979702  
7.969054  
9.471256  
43.798595  
8.32604  
22.931581  
24.549  
221.321136  
37.204071  
68.985992  
30.640192  
102.616623  
16.64822  
58.557159  
65.421745  
33.460587  
148.619812  
43.155605  
65.891953  
20.981627  
62.97583  
399.419708  
50.760174  
33.576756  
43.218948  
21.812683  
112.268944  
154.67778  
86.43502  
56.568188  
25.715828  
106.455894  
179.505844

23.036514  
63.249275  
19.550287  
82.882706  
410.230743  
683.7771  
184.781998  
497.520844  
184.278366  
296.523041  
65.676895  
342.682831  
110.708145  
400.364105  
90.164749  
22.601219  
29.183378  
71.449921  
39.107872  
59.37043  
61.112061  
107.768539  
70.050339  
163.446777  
44.166031  
17.574827  
221.7733  
4.038188  
27.309301  
7.814525  
34.746319  
0.34157  
38.079475  
123.170914  
47.090858  
112.677963  
50.722588  
12.158671  
104.512215  
28.118294  
178.516525

15.652794  
93.306351  
29.214653  
29.313036  
11.126798  
15.811748  
14.329245  
14.015564  
123.733086  
27.074402  
44.101978  
14.35863  
6.155172  
10.721004  
9.713006  
22.32065  
3.736112  
32.091564  
85.286369  
26.942924  
5.278212  
21.59157  
75.169785  
45.849319  
17.69949  
175.219315  
17.167364  
25.203447  
2.070029  
62.926189  
26.138466  
9.131082  
7.353465  
139.659927  
15.978188  
570.992249  
12.835812  
45.485397  
12.621147  
9.064642  
53.23106

15.779151  
5.659896  
15.88521  
14.004267  
13.043427  
124.04911  
19.008245  
87.860916  
5.042728  
13.490856  
32.864449  
10.058081  
20.426926  
29.186932  
17.937254  
4.806944  
27.831442  
19.321754  
9.059988  
22.659464  
7.176466  
62.018909  
9.99883  
22.594  
29.494081  
25.839191  
14.182241  
34.400959  
375.867493  
17.122402  
6.947441  
2.716703  
20.223705  
16.536671  
18.655691  
10.968467  
11.326395  
29.99987  
13.225543  
75.523079  
12.637168

10.619062  
4.877994  
12.197062  
178.177673  
19.571335  
25.907063  
14.017064  
5.343085  
9.266661  
23.227478  
12.405934  
2.289083  
1.667375  
3.185207  
13.590924  
11.399435  
52.529018  
22.738533  
103.029961  
9.595876  
106.42939  
17.027769  
21.087847  
202.821808  
4.483748  
3.533384  
18.971792  
3.171077  
11.436974  
15.496031  
5.970934  
53.232571  
9.589553  
70.053467  
3.790189  
24.107641  
21.575449  
14.068748  
14.457242  
8.244108  
7.422544

5.419513  
6.528108  
10.436019  
3.379301  
6.994289  
8.023037  
16.902817  
30.768412  
23.615408  
0.433106  
12.376817  
8.991276  
4.113094  
17.642231  
17.864897  
10.272554  
9.654679  
19.987232  
7.837506  
4.650867  
8.153193  
7.038646  
6.008068  
4.668673  
8.663558  
4.641039  
5.506835  
5.113564  
163.622452  
6.97879  
132.684494  
16.892315  
142.153381  
42.527702  
25.858227  
4.92276  
6.947025  
12.359893  
0.858216  
34.650894  
5.03643



2.284007  
6.704618  
6.370507  
1.32681  
9.661047  
2.177676  
6.9338  
9.047713  
20.669426  
6.753776  
38.727245  
2.486464  
20.649504  
25.418808  
6.254001  
630.365234  
6.463925  
5.422723  
5.058522  
2.069502  
15.61365  
64.93116  
4.131706  
23.363716  
4.78933  
10.456779  
11.587996  
10.277711  
42.633663  
10.2027  
40.521267  
11.959641  
9.658977  
2.491732  
31.342207  
4.082906  
2.11067  
4.779126  
12.410272  
158.575531  
8.88433

98.465302  
28.177198  
16.969709  
7.323458  
13.655189  
15.594678  
40.017471  
5.785352  
16.297213  
5.748512  
0.152162  
3.442945  
15.645225  
2.65229  
5.566576  
28.050184  
16.549877  
2.147611  
87.421242  
6.362761  
0.253912  
7.56364  
32.713802  
8.901401  
17.323786  
7.16659  
3.16897  
8.118667  
2.212425  
2.620984  
44.326843  
12.784983  
8.229899  
69.488602  
9.099564  
15.405324  
29.966673  
40.841732  
66.931076  
8.672691  
20.787077

39.044094  
3.575902  
56.29982  
7.811043  
20.009119  
51.794857  
16.160812  
155.436035  
9.634034  
14.524956  
61.484249  
10.971089  
4.739844  
22.107355  
2.266732  
1.912308  
18.786501  
152.242783  
2.589061  
35.695835  
2.044132  
47.261303  
0.730713  
10.306541  
25.530609  
66.938309  
3.344838  
31.785372  
4.70904  
4.721478  
1.803359  
5.281098  
9.885006  
13.092202  
124.615608  
10.123462  
13.912185  
410.256744  
44.665928  
24.529043  
12.465737

5.88425  
53.117161  
11.89667  
512.250061  
35.154179  
3.801337  
249.370209  
5.113541  
26.436941  
2.78195  
281.434479  
74.17099  
359.637848  
7.833282  
13.004964  
9.238247  
508.793091  
29.222031  
1.592302  
13.943667  
13.83308  
113.918495  
8.143534  
8.843555  
18.647379  
48.601517  
4.577452  
16.79492  
12.138915  
7.994121  
24.875544  
570.257996  
361.316254  
39.681656  
44.912571  
6.08085  
42.457806  
769.930298  
2.501392  
79.985329  
2017.47205

8.531002  
0.611711  
55.24704  
111.152596  
1.299634  
10.140447  
23.710846  
26.779951  
2.276055  
13.525484  
3.389668  
137.651291  
5.311932  
4.029206  
42.75005  
2.962973  
8.158969  
29.877115  
108.403397  
44.723755  
45.569416  
1.321997  
0.750726  
51.444283  
26.104534  
2876.29785  
8.487051  
44.89407  
7.394221  
5.017947  
76.732948  
42.887119  
35.165989  
16.799574  
1.093296  
23.677526  
2.197107  
10.85831  
5.536326  
183.85849  
13.972909

3.29776  
44.880463  
66.726494  
113.980553  
1.892271  
377.473206  
429.713348  
114.041145  
64.182755  
48.249973  
0.793004  
46.920292  
73.701775  
9.757102  
1.62616  
25.117285  
5.699217  
5.120349

EPIDERMAL MARKER (>2fold in epidermal cells in Sharr PALPS top 100 genes (Horie et al. 2018)

EPI

EPI



EPI

EPI

EPI

PALPS

PALPS

PALPS

PALPS

EPI



PALPS

PALPS

PALPS

EPI

EPI

EPI

EPI

EPI

PALPS  
PALPS

EPI

EPI

EPI

EPI

PALPS

EPI

EPI

EPI

EPI

EPI

PALPS

EPI

PALPS

PALPS

EPI



EPI  
EPI

PALPS

PALPS  
PALPS

EPI

EPI

PALPS

EPI

EPI

EPI  
EPI

PALPS  
PALPS

EPI

PALPS

PALPS

PALPS

PALPS

EPI

EPI

EPI

EPI

PALPS

EPI

EPI

EPI

EPI

EPI

PALPS

EPI

PALPS

EPI

EPI

EPI

PALPS

EPI

PALPS

EPI

EPI  
EPI  
EPI

PALPS

EPI  
EPI  
EPI

EPI

EPI

PALPS

EPI

EPI

EPI  
EPI  
EPI

EPI  
EPI  
EPI

EPI

EPI

EPI

EPI

EPI

PALPS

EPI

EPI

PALPS

PALPS

PALPS

PALPS

EPI

EPI

EPI

EPI  
EPI

EPI

EPI  
EPI

EPI  
EPI  
EPI

EPI  
EPI

EPI  
EPI

EPI

EPI  
EPI

EPI

EPI

EPI  
EPI  
EPI  
EPI

EPI  
EPI

EPI

EPI

PALPS

EPI

EPI

EPI

EPI

EPI

EPI

EPI

PALPS

EPI

EPI

EPI

EPI

PALPS

EPI
