# Supplementary material
Source: PubMed Central journal article supplement (PMC10214386)
Supplement: NIHMS1890223-supplement-Sup2.pdf [file NIHMS1890223-supplement-Sup2.pdf]

| Gene model | Gene name              | logFC HMX (adj | logFC Neurog (Ki |
|------------|------------------------|----------------|------------------|
| KH.S563.4  | HMX3_HMX2_HMX1         | 7.7882         | 1.9099           |
| KH.L141.43 | S35G2                  | 3.3456         | 2.4909           |
| KH.L24.10  | COE3_COE1_COE2         | 2.6729         | 2.3334           |
| KH.C4.649  |                        | 2.2796         | 3.6948           |
| KH.C4.115  |                        | 2.2740         | 2.5416           |
| KH.C6.129  | NGN1_NGN3_NGN2         | 2.2718         | 5.1432           |
| KH.L128.2  | NEC2_FURIN_NEC1        | 2.0502         | 3.0142           |
| KH.C3.474  | MDGA1_PGMB_MDGA2       | 1.7228         | 2.1380           |
| KH.C1.396  | SOGA3_MTCL1_SOGA1      | 1.6321         | 2.9416           |
| KH.S1075.1 | CECR5                  | 1.5287         | 2.9171           |
| KH.C2.14   |                        | 1.4651         | 2.8245           |
| KH.C6.185  | ONEC2_HNF6_ONEC3       | 1.4631         | 2.0830           |
| KH.C12.301 | FSTL5_FSTL4            | 1.4225         | 2.5816           |
| KH.C7.131  | ADA2A_ADA2B_ADA2C      | 1.4221         | 3.5629           |
| KH.L172.15 |                        | 1.3546         | 2.3585           |
| KH.C3.591  |                        | 1.3514         | 1.5874           |
| KH.C2.402  | MB211_MB212_MB213      | 1.3349         | 2.0724           |
| KH.C1.118  |                        | 1.2909         | 2.0900           |
| KH.C9.65   | DPP4_DPP10_DPP6        | 1.2449         | 2.9349           |
| KH.L6.1    | RFNG_LFNG_MFNG         | 1.2424         | 2.1601           |
| KH.L170.62 |                        | 1.1217         | 1.6738           |
| KH.C9.462  | SCN2A_SCN1A_SCN3A      | 0.9663         | 1.5911           |
| KH.C4.394  | TRAF4_TRAF2_TRAF6      | 0.8855         | 1.1702           |
| KH.C1.1067 | NCS1_NCALD_HPCA        | 0.8281         | 3.0762           |
| KH.C10.464 |                        | 0.8249         | 2.4914           |
| KH.L119.20 |                        | 0.8090         | 2.1589           |
| KH.C3.178  | SEGN_CALB2_CALB1       | 0.7785         | 2.3906           |
| KH.C7.173  | CTR2_CTR1_S7A14        | 0.7534         | 2.6538           |
| KH.L170.66 |                        | 0.7370         | 2.0235           |
| KH.C4.760  | CD5R1_CD5R2            | 0.6040         | 2.3116           |
| KH.L18.65  | PDE6C_PDE6B_PDE6A_PDE1 | 0.5621         | 3.0501           |
| KH.C11.495 | SSR2_RL3R1_SSR5        | 0.5433         | 2.2963           |
| KH.C8.585  | ANO4_ANO5_ANO7         | 0.4940         | 2.1591           |
| KH.S1090.3 |                        | 0.4329         | 2.1043           |
| KH.C2.506  | LBR_DHCR7_ERG24        | 0.3942         | 2.1138           |
| KH.C4.719  | SEM6A_SEM6D_SEM6B      | 0.3742         | 2.6350           |
| KH.C1.1157 | KCND2_KCND3_KCND1      | 2.6820         | 2.0109           |
| KH.C14.402 |                        | 2.2215         | 2.1486           |
| KH.L139.24 |                        | 1.8026         | 2.3619           |
| KH.S346.10 | KCNQ5_KCNQ1_KCNQ3      | 1.7223         | 2.5130           |
| KH.L147.13 | CXG1_CXD2_CXG2         | 1.6661         | 1.7318           |
| KH.L147.29 | CXG1_CXD2_CXA8_CXA3_CX | 1.5133         | 1.5567           |

|            |                        |        |        |
|------------|------------------------|--------|--------|
| KH.C7.140  |                        | 1.4640 | 1.5510 |
| KH.C1.90   | S2536_S2533_ODC        | 1.2795 | 1.5817 |
| KH.C4.378  | INSM2_INSM1            | 1.1565 | 2.3818 |
| KH.C9.352  | AN33B_ANR33            | 1.1047 | 3.5901 |
| KH.C6.128  | CELF3_CELF5_CELF6      | 1.0475 | 1.0200 |
| KH.C1.521  | RXFP1_LRP1B_LRP1       | 1.0362 | 3.2643 |
| KH.L19.15  |                        | 0.9922 | 1.1195 |
| KH.C4.777  | SVEP1_CFAH_FHR5        | 0.9687 | 1.7349 |
| KH.C1.274  | MYT1L_MYT1_ST18        | 0.9655 | 1.3587 |
| KH.C9.872  | ATOH8                  | 0.9580 | 1.1162 |
| KH.C3.390  | MYPC3_TITIN_IGFN1      | 0.9461 | 1.7491 |
| KH.L18.43  | KCP_VWF_OTOGL          | 0.7978 | 1.4168 |
| KH.S761.6  | CSAD_DCE1_DCE2         | 0.7952 | 2.7211 |
| KH.C2.765  | RIMS2_RIMS1_PCLO       | 0.7400 | 0.9454 |
| KH.S1526.1 | RIMS2_RIMS1_RIMS3      | 0.7233 | 0.9172 |
| KH.C1.314  | RGS19_RGS17_RGS20      | 0.7051 | 2.0155 |
| KH.L167.5  | S6A11_S6A13_S6A12      | 0.7029 | 1.2668 |
| KH.L9.36   | KCNK9_KCNK3_KCNKF      | 0.7002 | 2.2631 |
| KH.C3.273  | NRX1A_NRX2A_NRX3A      | 0.6868 | 2.5541 |
| KH.C9.102  | FA78B_FA78A            | 0.6823 | 2.4370 |
| KH.L22.28  | GABR1_GABR2            | 0.6788 | 2.2476 |
| KH.C2.674  | GCYB1_GCYB2_GCYA2      | 0.6559 | 3.4605 |
| KH.C11.185 | KI26B_KI26A_KIF9       | 0.6495 | 2.6025 |
| KH.C4.628  | PTN13_FRPD2            | 0.5936 | 1.0633 |
| KH.L9.14   | JIP1_JIP2              | 0.5837 | 1.6415 |
| KH.C1.744  |                        | 0.5598 | 1.8289 |
| KH.C9.192  | RUND1                  | 0.5393 | 1.4718 |
| KH.L96.50  | TLE4_TLE1_TLE3         | 0.4780 | 1.1445 |
| KH.S618.2  | MCF2L_MCF2_MF2L2       | 0.4339 | 1.3540 |
| KH.C8.892  | TBA1C_TBA1A_TBA3C      | 0.4275 | 2.0909 |
| KH.L116.85 | TBB4B_TBB2B_TBB5_TBB2A | 0.3895 | 1.4920 |
| KH.C12.380 | PLCD_PLCC_PLCE_LCLT1   | 0.3849 | 1.0328 |
| KH.C8.159  | NAC1_NAC3_NAC2         | 0.3421 | 0.9242 |
| KH.L18.39  | MIB1_MIB2              | 0.3316 | 1.8406 |
| KH.C2.36   | FRIH_FTMT_FHL17        | 0.3288 | 0.7904 |
| KH.L96.41  | AMPD2_AMPD3_AMPD1      | 0.3146 | 1.1539 |
| KH.L68.2   | STMN2                  | 0.3082 | 1.1792 |
| KH.L87.11  | KCC4_PHKG2_PHKG1       | 0.3069 | 0.9730 |
| KH.C8.372  | ASAH2                  | 0.2994 | 1.1627 |
| KH.C1.94   | MIB1_ANK3_MIB2         | 0.2865 | 1.5537 |
| KH.L96.13  | BIG3                   | 0.2850 | 1.4357 |
| KH.C8.400  | RAB3C_RAB3A_RAB3B      | 0.2656 | 1.5464 |
| KH.C5.558  | RIMB1_RIMB2_RIM3A      | 0.2656 | 1.8457 |

|           |                   |        |        |
|-----------|-------------------|--------|--------|
| KH.C3.389 | RAB2A_RAB14_RAB2B | 0.2491 | 1.3347 |
| KH.C10.81 | 2A5A_2A5D_2A5G    | 0.2132 | 0.6266 |

logFC NeurogWRPW (Kim et a BTN top 100 genes (Horie et al. 2018)

|         |      |
|---------|------|
| -2.7808 | TRUE |
| -3.0841 | TRUE |
|         | TRUE |
| -2.2983 | TRUE |
| -1.3456 | TRUE |
|         | TRUE |
| -2.7947 | TRUE |
| -3.3492 | TRUE |
| -1.4225 | TRUE |
| -1.9245 | TRUE |
| -2.8951 | TRUE |
| -1.6704 | TRUE |
| -1.4671 | TRUE |
| -2.7786 | TRUE |
| -1.0203 | TRUE |
|         | TRUE |
| -1.6445 | TRUE |
| -1.0542 | TRUE |
|         | TRUE |
| -2.6679 | TRUE |
| -1.3054 | TRUE |
| -1.4421 | TRUE |
| -1.3099 | TRUE |
| -1.3886 | TRUE |
| -0.9163 | TRUE |
| -1.2754 | TRUE |
|         | TRUE |
|         | TRUE |
|         | TRUE |
| -2.6428 | TRUE |
|         | TRUE |
|         | TRUE |
| -1.6407 | TRUE |
|         |      |
| -1.1672 |      |

-0.9076

-2.1435

-0.6012

-1.3567

-0.8293

-1.6968

-0.7690

-1.0652

-0.7828

-1.1365

-0.7701

-0.9660
