# Supplementary material
Source: PubMed Central journal article supplement (PMC10214386)

- 1 **Supplementary File 3. Lamprey CNE sequence alignment.**
- 2 Global alignment of uCNE and dCNE sequences from a range of vertebrates
- 3 including lamprey and hagfish. The conserved core is marked in green, dCNE
- 4 specific alignment in blue, uCNE specific alignment in red. Fasta files of uCNE and
- 5 dCNE sequences in Supplementary Files 4 and 5
- 6

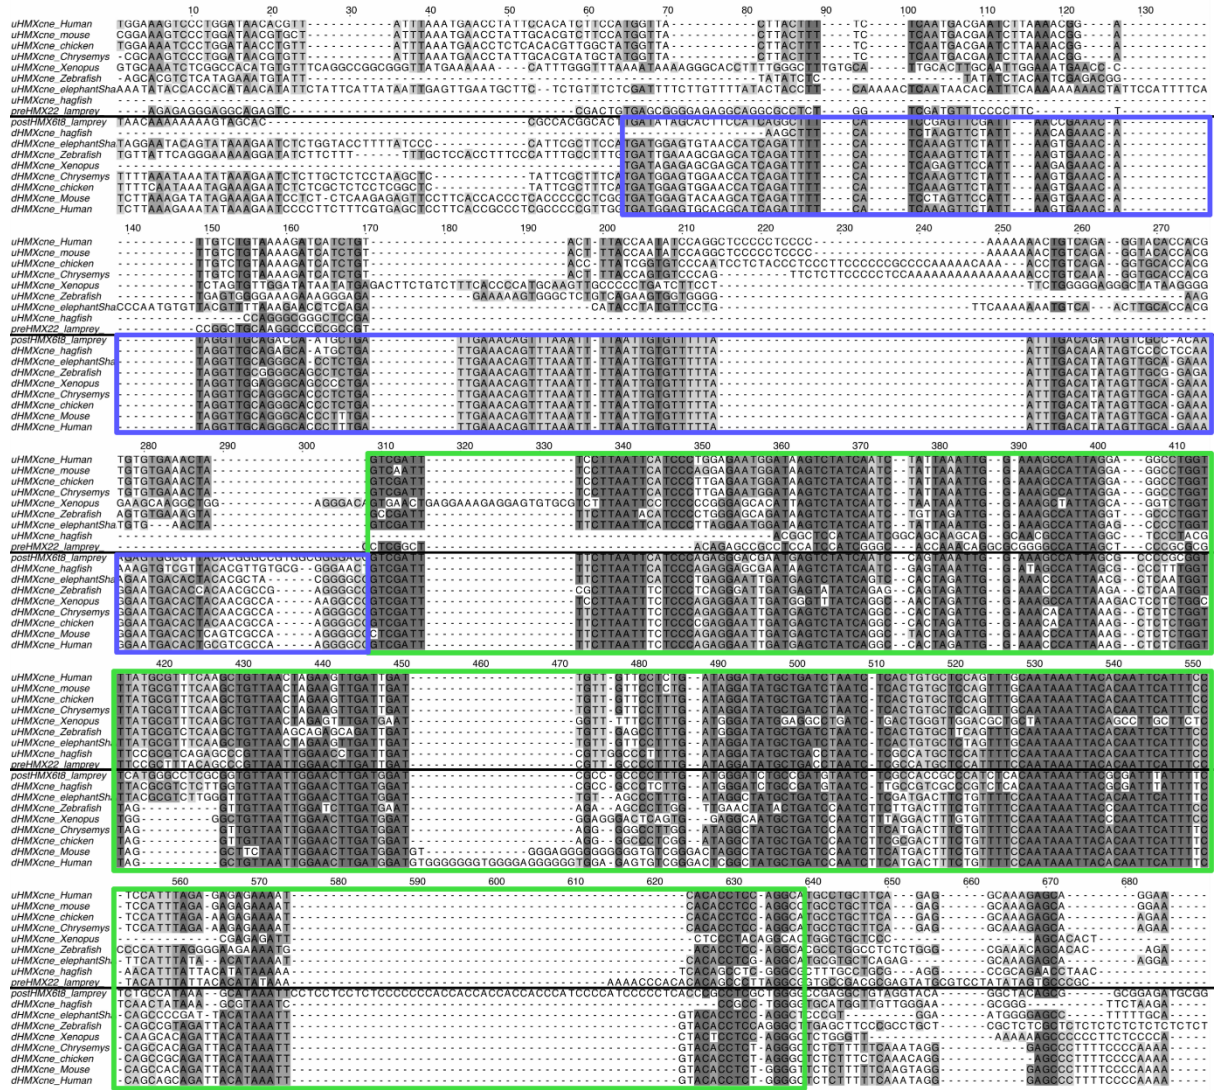

Supplement: NIHMS1890223-supplement-Sup3.pdf [file NIHMS1890223-supplement-Sup3.pdf]
