# Supplementary material
Source: PubMed Central journal article supplement (PMC10214386)
Supplement: NIHMS1890223-supplement-Sup4.pdf [file NIHMS1890223-supplement-Sup4.pdf]

>dHMXcne\_Zebrafish

-----C CACTGTCATAAACTGAAAAAGAATTATCACTCGATAATTTCCATTTGACCA  
TATCTTTATGCAAAGAAGGGGGTGGGGGTAAACAGACAACATGCTCTCTGCGCATTAAC-  
----ATAGACGTTAGAAAGACTCTGGATAAATAGTTCAAATAGCCGGCTATAACAATCCCC  
TCCCCTCATTTGTGTT-----CATAAATCACTTTT-----TGTA AACG  
TGAAAATTCCTATTCCCTTTGTGAATCTGACGGGGTGTGCATGTCATCAAAGCTTGGGCT  
AT-----TCAA AACTGACGGAACGGTGATTTAACAATTTTCGATAAAAAACGATAGC  
CTACGTTTAGTTGGCCGACCTCATATTTTCAAGCGGAAAGGATAGCAACTCACTGCGTCA  
CAGGATGAGGCT-----GACAAA  
ATGGACCATCATCTGCCAATTGAATTATCTTTTCGCTGT-----  
-----GTAGGGAAAATGTTTTTCAGCGCTCTGCAAAGTACATTTAC  
CCACAATAGACGGCGAGAACGTGAACCTCAATCCTACGTAC-----  
-----AACACTTTAGAGGAACTGGCCTATCT-----  
-----TTGCTTATTACTTTC-----TTGAAATGTTTTGGTGTATTCA-----  
-----GGGAAAAGGATATCTTCTTT-----TTTGCTCCACCTTTCCCATTTGCC  
TTGTGATTGAAAGCGAGCATCAGATTTTCATCAAAGTTCTATTAAGTGAAACATAGGTTG  
CGGGGCAGCCTCTGATTGAAACAGTTTAAATTTTAATTGTGTTTTTAATTTGACATATAG  
TTGCGGAGAGGAATGACACCACAACGCC-----GAGGGGCGGTTCGATTTCGCTTAATTTCT  
CCCTCAGGGATTGATGAGTATATCAGAGCAGTAGATTGGAAACCCATTAAGA--CTCAAT  
GGTT-A-----GGTTGTTAATTGGATCTTGATGAAT-----AGA-----  
-----AGCCCTTGGT--TGA ACTATACTGATCCAATCTTCTTGACTTTCTGTTTTCCAAT  
AAATTACCCAATTCATTTCC-CAGCCGTAGATTACATAAATTGTACACCTCCAGGGCTTG  
AGCTTCCCGCCTGCTCGCTCTCGCTCTCTCTCTCTCTCT-----CTCT  
CTCTCTCTCTCTCTCTCTCT-----  
-----TCTCTCTCCAAAACCATTTGAGAAAAAATAAAAAGACCAGCCTCAGAA--T  
CTTGAATGAAAATCGAAACATAATCAGCGTTTATACTTAGAAAATTTATTGATATCATT  
TCTCTGGTAATT-TCCTTATCTTAAAGTT-GGACATGCCATATATCACAATACACACGTG  
TAAAGGGCC-----C-----TTTGTTTTAATATTTATCGAAGCTTGATTTTCAGATC  
AAAGGCGCCCATGACTTCATCTGTCTTTCTAGTGGAAGCATTTT-----TACCAGA  
GCTCGATGTGTATGTTTCGGTCATTACTATCTGCTGCAGCACGTGCCAAAAG-----C  
CTGTTTCAGCCGATTTGAAAGATCTTT--AGCTT--TCTGAACGCAAGACCGATTGTC  
CCATAATCATTGGGTGTTTCATCACAGTAAACCTGTCTAGG----TATTTGCAAACTTAT  
AGGTGCTCA-----GTTTGCCGTGCTGGTCAATAGGCTAATA  
GAAACA ACTTTTCAAAAATTTTGCACACTATAA--AACATTAACAG-----  
--CTGCACATCAACAAAAAATGATAATACTGCTC-----CCTCCTTCCCAAACAC  
G-----TTCAATATAACACCGTGAGGGGCCTCCATTTCTGGTGTATTGTTTTTGTTTAA  
TATGTCTAAA-----CGGCCTTTAAGCTATC  
CAGCCTCGGCTGACAGGCGCAGCATA-----TAAAACCGGCTCTTTAACGATCATTGCGG  
ATTTACGCCTTATGTGAATGCGCCATAAATCGTTGAGCCGCTGTGAACTAGACACTCAT  
ATTTTACGCACTAAATGGCTATA-----TGTGGGCATATGGTCTCT  
TACAATAGGTCTCTTTAAC-----AACCGTTCCAAACAGAGTT  
GCAGATTGTGACAGTTCAAC-----CACATCGTTT  
CCATCATCGTGTACATATATAGCGC-ACGTGTCGTATTTGCTAGACCAAACAAATATCTT  
CCAAATGTTT GAGCTAGTCACACATACTG-----CAAATGAGA---

>dHMXcne\_Chrysemys

-----GAAAGTTACATATTTAGGAGGCAAACAAGTTCTATGG  
ATATTAAGAAAAGAAAAGAGTATGGGTCCAAATCCTGCAGTCCTCACTCACGAAAACCTC  
CCCCTGAGTTTGGC-----CTCAGTAGGTATTCAGAATTGCGGGATTCTGCCCTGGGT  
GCATAGGGGAGCGCTGCAAG----CCTGTGGCTTCCAG-----GGTGAAG  
CAATAA-----AATTCGAGGTAAAGGGGGACGGAGGGGTTACGCTGTACCTT  
TTCTGACTGTTACGAGT-----TACTCACGCATATTTCAAAGTCCAAAT  
CAACCAATC-----GCAAGTTTGCCTCTTTACCAACATAAACCCTTT-----  
-----AGCTCTGATTTAGACTGCCTTGTCTTTGGTCTTTATCGTGATAAAAGGGGGT  
AGAGGGGAATATTTGTTTTATTGACTGCTCACTTTCCCC-----CACA  
---TCACATGTGTGACGCCAGATATATAGGCAGGTGCCATCCTCCAGGCATTCCCGCTGC

CTTTGAAAGCGGCAATTTGATGGGACTAAAACTCCGCTT-----  
-----CTCTGAGGTTTGGTCACCTGGTC-----  
-----TTGCCCTCTC-----CTGAGCT---CTAATATTTTAAATA-----  
-----AATATAAAGAATCTCTTGCTC-----TCCTAAGCTCTATTTCGCTT  
TCATGATGGAGTGAACCATCAGATTTTCATCAAAGTTCTATTAAGTGAAACATAGGTTG  
CAGGGCACCCCTCTGATTGAAACAGTTTAAATTTTAATTGTGTTTTTAATTTGACATATAG  
TTGCAGAAAGGAATGACACTACAACGCC-----AAGGGGCGGTTCGATTTTCTTAATTTCT  
CCCAGAGGAATTGATGAGTCTATCAGGCCACTAGATTGGAAACACATTAAAG--CTCTCT  
GGTT-A-----GGTTGTTAATTGGAACCTTGATGGAT-----AGG-----  
-----GGGCCTTGGA--TAGGCTATGCTGATCCAATCTTCATGACTTTCTGTTTTCCAAT  
AAATTACACAATTCATTTTC-CAGCCACAGATTACATAAATTGTACACCTCTAGGG----  
-----CTCTCTTTTTCA-----AATAGGGAGCCCT  
TTTTCCC-----AA-----AAG-----  
-----CCTATTGCGAGATGTCATTTG-----CACCAAGAAACGAGCAGCAGAAGCT  
CTTGAATGAAAATCGAAACATAATCAACGTTTATACTTAGAAAAATTTATTGAGATCATT  
TCTCTGGT-ATT-TCCTTATTTTAAAGTTTGGACGCGCCATATATCATAATCCACACGTG  
TAAAGGGGA-----C-----TGTGTTTAAATTTATCGAAGCTTGATTCCAAGATC  
AACTTGTTTTATGACTTCATCTGTCATTTTCAGA-GGGAGCCTTCTTCCAATATTACAGCA  
GCTCAACAAGCCTAT-----TTTCCAAGCTGCTGCAAAA--GCAGTGGAGATCAATTT  
TTATTAGGCTCC-TTTGAAAGCTTGCTCAGGGCCA--CTTTAATACTGAGC----ATTC  
TAATAATCTGGAGAGCTAA--ACTTTAAGCGTTCATTCT---GTCTTGGAAAGTTTAT  
CTCACTGTA-----ACATTGGACCGTATTTAGCCTCTCACACATGCAGGAGCTG  
AGTTGCATCCCAGACTGCGTGG-----AAATGTGAACATCCGAAACACATAT  
AACTGGGAAAAGACACAGAGATGCAGATTCTATTTTCGCATTTATCCCCAATACAATCGCC  
A-----GCTTCTGCGCTGCTAAATATTTGATCA  
TATGGTAATGAAAGTGTAGTTGGGATGCTTCCACCACCTGAAAGGGAAGTCCAAGAGCCC  
CAGA-----CAATCTACATGGATAATGTCAAAGCAGCCATTCAG-----  
-----GCCGAATTAATTCCCCAACACAAGATTGGTATTGATAAATATTTCC  
AGAAGTAAAACGGACAACAAACATAATA-----TTTT  
AGCTTATCGTTCTCCTGAC--AGATGTGGTCATTTAACAAGTTGAAACTGAAATGGGCGT  
ATAAAATCTGCCATTTAGCTATGACAGGGCAGA-----TTTTCA  
CGCCCTGTCTGCACCGGTTGTAAATTTCTGTTCCAAGTCTGCTCCAGTCAGAAGTCCCAAT  
ATATCACCGTTTCACAGAGGACTCTGCC-----TATGTGAGCATA

>dHMXcne\_Xenopus

-----  
-----  
-----  
-----GCCTGCTCT-----CCTGTGCCCCCC-----  
-----  
-----  
-----  
-----  
-----  
-----  
-----TGGCCACTAACACTGCTGCCTGCTCTCCTGTGCC-----  
-----CCCCTGTGC  
CCCC-----  
-----  
-----CTGGCCACTAAC-----GCT-----  
-----ACCGCTGCTC-----TCCTGTGCCGGGTCCCTGT  
---TGATAGAGAGCGAGCATCAGATTTTCATCAGAGTTCCATTAAGAGAAACATAGGTTG  
GAGGGCAGCCCCTGATTGAAACAGTTTAAATTTTAATTGTGTTTTTAATTTGACATATAG  
TTGCAGAAAGGAATGACACTACAACGCC-----AAAGGCCGGTTCGATTTCTTAATTTCT  
CCCAGAGGAATTGATGGGTTTATCAGGCAACTAGATTGGAAAGCCATTAAAGACTCCTCT  
GGCTGG-----GGCTGTTAATTGGAACCTTGATGGAT-----GGA-----  
-----GGGACTCAGTG-GAGGCAATGCTGATCCAATCTTTAGGACTTTGTGTTTTCCAAT  
AAATTACCCAATTCATTTCC-CAAGCACAGATTACATAAATTCTACTCCTCCAGGG----  
-----CTCTGGGTTA-----AAAAGCCCCCT

TCTCCCC-----ACCCCATAG-----  
-----ACTAT-GCCAGATGCCATTTG-----CACCAAATAT-----CT  
TCTGAATGAAAATCGAAATATAATCAACGTTTATACTTAGAAAATTTATTGCAATCATTT  
TCTCTCGTAATT-TCCTTATTCTAAAGTTTGGACATGCCATATATCATAACCCCAGTCAG  
TGGGGGAAAAATAGGCAAGTACCATGTGTTTAAATATTTAGCAAAGGTTTATTCCAAGATC  
AACTTGTTTATGGCTTCATCTGTCAATTTACACCCATAGACTTTCCCAATATAACGGCC  
CAGCAACAAGCCTA-----TTTCCAACACTACAGCACAAAGGGAAAAAAGGATCAATTT  
TTATTAGG-----GCTGCATGAAATCTCACAGCTC---CCTCAGTGTGAAGC---TGCT  
TTGGTGCCATAAGGATTAACCCACTGGCAGCCTCCATTCTCAGGGCAAGGGAAAG---AA  
AGGATCATG-----GAGCAGTGAGAGAGATATATGAGAATATAGATAATTAATATA  
AGCCTAGAACCCTTCATTCTCTGTTCTATTGAA--AACAGCATCTGCCTGTCC-----  
--TTTGTATTACT--GCACTGCTGGTTCTGACTACA---TGACCATTAAAGTCTCC  
A--GTCCCTGTACACTGC-----TACAACCTGTCTCCTTTACATTCTGTTTAATTA  
TAGAACATGGGAGACACTGTAGGAGT-----TGGAGTCTAGGTTGTA  
GGGAGTCAGAA---CCAGCAGTGCACAGAACAGTACAGGGCAGTCAG-----  
-----ATACTGCTATTAATATCAGCATTTATAAATAACTAAACATTTCT  
AATAAATGTACATTA AAAAGTTACTTAGAGTTAAGGGTTAGGGTTGTTCCACTTGAAATT  
AACTTTTTTATTATTATTA-----ACATTTATTTATAAAGCGCCAATATATTCCGCTTT  
ATATAATGTAGACATT--GCTATTCTGAGACAA-----TTTGCAATTGGTTTTTATTT  
TTTTATTTTTTTCAGTTATTTAGCTT-TTTGTCTAGCAGCTCTCCAGTTTGAATTTTCAGT  
AGCTATCTGGTTGCTAGGGT-----

>dHMXcne\_chicken

AAAGATGCTGCGAGTGGCTCCGTAATAATCGCTTTACTCCATCGACTCCGCGTAGCGCGC  
AAACGGGACGAGGAGACCATTAGGAGCATTAAACAGATTGGCACGGCGTAATGCTGCGGTC  
CCTATTGATCGCGGCACGTCTGTAAAATATTGTTTCCAATGAATCTATTGTTCCC---GC  
TCTCTTTGGGCGCTGTTGGTGACCTTGCGCCGCTCC-----CGCCCCAC  
CGAGGTGTCTCGGAGCTCTGTCCGGGCTCGGAGCCGCCCA-GAGCGGGGTTTGGGGG  
TTGGCGACGTCTCAAAGCGTGCGGAAAAATAACTCTGACATAAGGAAAAAGGGGAAGGA  
GA-----GAGGCCGGGCGGCTTCGAGGGGCGCAGCTTCGC-----  
----GTTGAGCTCGGCTGAGAGGTCCGAAGCTTTTCGCGTCCGGTATCGACGGGGAAGG--  
---GGTGCAGCCCTGCCCGCGCAGCGCTCCCCATCCC-----  
-----GTTCCCACGT  
CCCCAC----GTGGGGGCACAGGAACCGGCGGCGCTCCGGCCCCGTCCGCTCCGCTCTCC  
CCGCCCGTCCGGGTGCCCAGCAGTGGGAGCGCAGCGCC-----GGGCAGAGC  
CCCGATCCTCGCTGAGCGCTCACCTGGAGCCCGGGCGGGCCCCGTGTTTTCAATA-----  
-----AATAGAAAGAATCTCTCGCTC-----TCCTCGGCTCTATTGCTT  
TCATGATGGAGTGAACCATCAGATTTTCATCAAAGTTCTATTAAGTGAACATAGGTTG  
CAGGGCACCCCTCTGATTGAAACAGTTTAAATTTTAATTGTGTTTTTAATTTGACATATAG  
TTGCAGAAAGGAATGACACTACAACGCC----AAGGGGCGGTTCGATTTTCTTAATTTCT  
CCCCGAGGAATTGATGAGTCTATCAGGCCACTAGATTGGAAACACATTAAAG--CTCTCT  
GGTT-A-----GGTTGTTAATTGGAACCTTGATGGAT-----AGG-----  
-----GGCCCTCGGA--TAGGCTATGCTGATCCAATCTTCGCGACTTTCTGTTTTCCAAT  
AAATTACACAATTCATTTTC-CAGCCGCAGATTACATAAATTGTACACCTCTAGGG----  
-----CTCTCTTTCTCA-----AACAGG-AGCCCT  
TTTTCCC-----AA-----AAG-----  
-----CCCATGCGAGATGTCAATTTG-----CGCCAAAAACGAGCGGCAGAGGCT  
CTTGAATGAAAATCGAAACATAATCAACGTTTATACTTAGAAAATTTATCGAGATCATTT  
TCTCTGGT-ATT-TCCTTATTTTAAAGTTTGGACGCGCCATATATCATAATCCACACGTG  
GAAAGGGGA-----C----CGTGTTTAATATTTATCGAAGCTTGATTCCGAGATC  
AACTTGTTTATGACTTCATCTGTCAATTTCCGA-GGGAGCCTTCTCCCATATTACGGCC  
GCTCTACGAGCCTAT-----TTTCCAAGTGCTGCAGAA---GCAGTGCAGATCAATTT  
TTATTAGGCTCCTTTTGAAGCTTGCTCAGGGCCA---CTTTAATACCGAGC---ATTG  
TAATAATCTGGAGATCTAA---ACTTTAAGCGTTCGCTCT---GTCTTTCAAAGTTGAT  
CTCGCCGTG-----CCGGTTGATCACATTCGCCCGACGGCGCGGGGGGGGGG  
GGCCCCATCCCTCAGGGGGCGGCGGGGGGGCGGATTGGGCCGGACTGCCCGGGGAGCGTTC  
GTTCTGTCTGTGCTGACGGGCGTGGGGCTGATTCAT-----CCCCCTTGGGAGCGGC

G-----ACGGAGCGCGGC-----TGAGCTCCTATTGGCTTGGCCCCGTTTTGTTTTGTTTTG  
CTTTGCTTTG-----CTTCGGTTTTGCT  
TTGGTTTTGTTTTGCTTTGATTTGGTTCCGGCCC----GCAGGCTGCTGGTGTCCCTTCCC  
TTCCCTTCCCTTCCCTTCCCTTCCCTTCCCTTCCCTTCCCTTCCCTTCCCTTCCCTTCCCTTCCCT  
-----TTCCCCCTTCCCTTCCCT  
TCCCTTCCCTTCCCTTCCCTTCCCTTCCCTTCCCTTCCCTTCCCTTCCCTTCCCTTCCCTTCCCT  
-----CTTCCCTTCC  
CTTCCCTTCCCTTCCCTTCCCTTCCCTTCCCTTCCCTTCCCTTCCCTTCCCTTCCCTTCCCTTCCCT  
CCCCTTCCCTTCCCTTCCCTTCCCTTCCCTTCCCTTCCCTTCCCTTCCCTTCCCTTCCCTTCCCTTCCCT  
-----TTCCCT-----

>dHMXcne\_Human

-----  
-----AGAGAGGAAAGAGCCACGAGAACAACACTAGGCGGGATGT  
ACTTTTGGAGCCCTGC-----CGGGTGTCTCCGATCGGAGTCTGGGGTTGAG---  
--ATTTGGGCTGCACTTGTCCCCGGTGTGTCTCTCCGGCGGAGTACCCTGAAGGTGCACG  
AGGTGGGGAGCATAGGCTGAGGTGGGTAATCGGGTCCCTGGATAGAAACACAACCCTCGTC  
CTCACTGGGGCCCATGTATGCGCCTGGGATTCCCTCCCCACCCT--TCCATTTCCAGGAC  
CC-----CTAAGGGTATCACTCCAGCGACGGGGCGGTTCTG-----GAGACC  
CGAGGGAAGGGATAGCTGGAGACTGCAGCGCGCCTTCTCCGAGAGTCCCCTG-----  
-GAGGTGCGCATGAGTTGTACTAGCGCAGATCTCTTCCCTTGGCTGCTGCTCCTGGCGATG  
CATCTCCGGGGGAAACTTCCCAAAGTCTGAGTTGCCGGGGTTCCAAAAGGATCCCTTTGG  
GTTTAGGCCTGGGAGAGGTATAGAGCCAGCGAGAGAGCGC-----GTTGCGCCT  
ATCACTGAGGCAGGAGCGGTGAGGTGGAGTCACCTGCTG-----  
-----TGCCCTCAC-----CCAAGCG---CTAATGTCTTAAAGA-----  
-----AATATAAAGAATCCCCTCTTTCGTGAGCTCCTTCACCGCCCTCGCCCCCGT  
TGGTGATGGAGTGCACGCATCAGATTTTCATCAAAGTTCTATTAAGTGAACATAGGTTG  
CAGGGCACCCCTTTGATTGAAACAGTTTAAATTTTAATTGTGTTTTTAATTTGACATATAG  
TTGCAGAAAGGAATGACACTGCGTCGCC----AAGGGGCGGTTCGATTTTCTTAATTTCT  
CCCAGAGGAATTGATGAGTCTATCAGGCCACTAGATTGGAAACCCATTAAAG--CTCTCT  
GGTT-A-----GGCTGTAAATTGGAACCTTGATGGATGTGGGGGGGTGGGGAGGGGG  
GTGGAGAGTGTTCGGGACTCGGCTATGCTGATCCAATCTTCATGACTTTTCTGTTTTCCAAT  
AAATTACACAATTCATTTTC-CAGCAGCAGATTACATAAATTGTACACCTCTGGGG----  
-----CTCTCTTTTTTCA-----AATAGGGAGCCCT  
TTTTCCC-----AA-----AAG-----  
-----CCTATTGTGAGATGTCATTTG-----CACCAAAGAACGAACAGCAGAGGCC  
CTTGAACGAAAATCGAAACATAATCAACGTTTATACTTAGAAAATTTATTGAGATCATT  
TCTCTGGT-ATT-TCCTTATTTTAAAGTTTGGACGCGCCATATATCATAATCCACTCGCG  
TGGGGGCGGGGGGGCAGA-C----TGTGTTTAAATATTTATCGAAGCTTGATTCCAAGATC  
AAACTTGTTTATGACTTCATCTGTCAATTTCCGA-GGGAGCCTTCTTCTATTACC----CG  
GCTCAGCCAGCCTAT-----TTCCCAACTGCCGCAGA----GCAGAGAGGATCAATTT  
TTATTAGGATCC-TCGGCAAGTTTGTCTCTGGGCCG--CTTTAATATTGAGC----AGTG  
GCATAATCTCGGGACCTAA---ACTTTAAGCGTTCTTTCA---GGCTCAGAAAGTTTAT  
CATTCCTTG-----GAACCTGGTTATGCCTAATTCCTAGGAGAGGGAGACAGGG  
GGT--CGATCCCAAAGATGCAG-----AGGGGCCATCCTCCAAGGTG-----  
--TGGGTATTAACCTGAGTAGGATTGGGCGGAG-----CTATCCCAAGGCTA  
G--GGAGGTGGGCGGGGT---GTGGGATAGTACTGAGTTGAAGGATT-----GCCA  
CTCGTTAGGGGAGAGACATGAGGTGTCTGTGGGTGGTGGTTCCAGGAACTGAGTGTTCCT  
GGGAGTGAGTT--TTGTAGCTACACTGGGCCAGGAGAGGGCGTCTGG-----  
-----GCCTCCGTGCTCCCGGTGAAGATCCCCATATGCTAGA  
AAGGGGCGGCAAGGAAGGTTGT-----TTCTTGTCCCT  
CCCGTCCCTTGCGGTGTGAC--GGCTATAGGTGCTGGAGGGGCGGGAGGTCCCTCGGGCTA  
TCAATCGAGGGGAGCTCAGGGGAACTGCAGTCAGTCAGGCTGCAGAGCTGGGTCTCCACC  
ACAGCCTTCCCTTGCCCCAGCCCCGT-GCCACCACCATCTCTTCCCTGG-----

>dHMXcne\_Mouse

-----CGGGTCTTTCCCTTGCTGGAGCAGATGATGTTG  
ACCTTTTATCATACAAACAAGGAGGGTGAAGAGGCACCTCTCTTAACTATGCCTTAAAT

ATTAGGGAGCACTGC-----CTAGTGCTTCCCGCTGGGATCTAGGATGAAG---  
--ATTTGAAGTCCACTTGA-----TTGCTCTTCTTT-----TGTGAAAA  
CTGTGAGAACCAACAGTGAGGTGGGAAGGGAAGG-----  
-----GGGTGCCAAGGAGGTAGGGTTCTAGACTACAAC  
CATAGTC-----CCAGCCCGATCTATTGATCTGCATGAGACTCCTTCTAACTCCCACC  
CATGACTGGGCATGACTGGGGAGAATATTGATGCTTGATGCTTCTTGCCTCCAGGAAG--  
-GGAGTGCTCACCGGCCATGCTAGCTTACTGTTC-----  
-----CATGGAGAGGAGTGC AAAGTCTGGGCGCTGAGGTGGCAAAGAGGTCTTTCTGG  
TTCTGGT--GCCTGGAGAAGTGAGCCAAGGAAAAGGTGT--AGGGGAAGAGAGATGCGC  
ATCATTGAGTCGGGAGCAGTGAGGTGGACTCATCTGGTG-----  
-----TCCCTCAC-----CCCAGCA---CTAAAGTCTTAAAGA-----  
-----TATAGAAAGAATC-CTCTCTCAAGAGAGTTTCCTTACCACCCTCACCCCCCT  
CGGTGATGGAGTACAAGCATCAGATTTTCATCCTAGTTCCATTAAGTGAAACATAGGTTG  
CAGGGCACCCCTTTGATTGAAACAGTTTAAATTTTAATTGTGTTTTTAATTTGACATATAG  
TTGCAGAAAGGAATGACTCAGTCGCC-----AAGGGGCGCTCGATTTTCTTAATTTCT  
CCCAGAGGAATTGATGAGTCTATCAGGCTACTAGATTGGAAACCCATTAAAG--CTCTCT  
GGTT-A-----GGCTTCTAATTGGAACCTTGATGGAT-----GTGGGAGG  
GGGGGGGGTGTGCGGACTAGGCTATGCTGATCCAATCTTCATGACTTTCTGTTTTCCAAT  
AAATTACACAATTCATTTTC-CAGCCACAGATTACATAAATTGTACACCTCTGGGG----  
-----TTCTCTTTTTTCA-----AGTAGGGAGCCCT  
TTTCCC-----AA-----AAG-----  
-----CCTATTGTGAGATGTCATTTG-----CACCAAAGAACGAACAGCAGAGGCC  
CTTGAATGAAAATCGAAACATAATCAACGTTTATACTTAGAAAATTTATTGAGATCATTT  
TCTCTGGT-ATT-TCCTTATTTTAAAGTTTGGACGCGCCATATATCATAATCCACTCGTG  
GAAAGGGGCGGGGCGAGAC----TGTGTTTAAATATTTATCGAAGCTTGATTCCAAGATC  
AAACTTGTTTATGACTTCATCTGTCATTTTCGA-GGGAGCCTTCTTCCACTATTACCA-G  
GCTCGGCCAGCCTAT-----TTCCCAACTGCCGCAGA---GCAGAGAGGATCAATTT  
TTATTAGGCTCC-TCCGCAAGTTTGTCTCTGGGCCG--CTTTAATATTGAGC---AGCC  
ACATAATCTCGGGACCTAA---ACTTTAAGTGTCTTTTCA---GTCTGGAGAGGTTTAT  
CATTCCTTG-----GAACAGGGTTTGTGCCTAACCCCTTATGGAGAGGA  
GACTCAAGCCCCCTCTG-----AAAAGCAACTTCCTAGGG-----  
--TGTCCATTAACAGAGAGACATAGGGAAGGGAGGAG-----CTATCTGGAGACTC  
A-----GTGGGCGGGGCCAAGTGGGGGAGTACTAAGCTGAA-----GGATTGATCAA  
CTTGATCCAGA-----GAACTGTAAGTGAAGGTTTCT  
TGGAGTGGGTA--CCAGAGCGGTGTGGGACTCAAAGGC---TCTGG-----  
-----CCCTTATCTACACACTTAGTGAAGTCTAAGTCCCC  
AGGAGTCTGAAAGAGGAGGTGC-----GGTGTTGCTATTTTATTCTT  
TCCAGTTCTCCCTGTGACCGAGTAGAATGAGAGTAGAATGACTAAGTGGAATGAGTGGG  
ATGAGAGGTGACCAGTCAG-----AGGAAGGTCTTTAAGCCTCTTGTACCCA  
CCACCCCACTCACTTAACTAGCTTAGTGTGTTCTCTGTGCTGGGTGTGAGAGTGTGTGT  
CCCTTTGTTTCTGTTGTGCGTGACTTGCTAGTTCAATGTGTATGGGTGAA

>dHMXcne\_lamprey

-----  
-----  
-----  
-----CGAGGCGTCCCG-----CGCGCAAC  
GCGCGT-----  
-----AACGAAGTAGAGAT  
CT-----  
-----G--  
-TCGGAGAACCCACCTCAACCAAGGCACCCACCCACT-----  
-----CCACCACGACACCCCGTGC  
GA-----GACGGCGAGATAGAATTGGCAACGTAAC-----  
-----  
-----AAAAAAAAGTAGCACCGCCAC-----GGCACT-----

---TGATATAGCACTTCCATCAGGCTTTCATCCGAGTTCGATTAACCGAAACATAGGTTG  
CAGACCA-ATGCTGATTGAAACAGTTTAAATTTTAATTGTGTTTTTAATTTGACAGATAG  
TCGCCACAAAGAGTGGCGTTACACGGGCCGTGGCGGGGACCGTCGATTTTCTTAATTCAT  
CCCAGAGGGACGAAATGAGTCTATCAATCCAGTAAATTGGAAAGCCATTAGCG--CCCCG  
GGTTCATGGGCTCGCGGTGTTAATTGGAACCTTGATGGAT-----  
-CGCCGCCCTTTGA--TGGGATCTGCCGATGTAATCT-CGCCACCGCCATCTCACAAT  
AAATTACGCGATTTATTTTCTCTGCCATAAA--GCATAAATTC--CTCCTC-----  
-----CTCTCCCCCCCACCACCACCACCACCACCCATCCCC  
ATCCCCCTCACCCGCCTCGCTGGGGCCGAGGCTGTAGGTACAGGCTACAGCGGCGGAGAT  
GCGGGGCGACCCATCCTGGGCCACCATTCA-----TGCGGGCAAGGCGACGGTGGACGC-  
--TGAAAGAAAATCGAAACATAATCAACCTTTGTGGTTAGGGAATAGATTGGCGCCATTT  
TCTGCCGTAATTCCCCCATTTTACCCCTATGCTGGGACATACATCATAATA-----  
TAAAGGGCAAATACGGC-T----GGCCTTTAATATTTATCGGTGGTTGATTCTCAATTC  
TTACTTGTTTATGACTTCATTTATCATCGCGGACTGTAACCTTTTCCA-----  
-----TTTC-----GTAGAA-----TA  
TTATCAGGCAA--GCGAAAACCTTCGCTCG-----CCTCACGACCAAAT-----  
-----ACC-----AT  
TTCGCCGTA-----ATATTTGTTGACGGCCGC-----  
-----  
-----AAAAAGAGTAAAATATGA-----  
-----  
-----CAAGAGAC-----  
-----  
-----  
-----  
-----  
-----  
-----  
-----

>dHMXcne\_elephantShark

-----TGCTTCAGTT  
CGTATTGATCGCAAAATGTCTGCAAAATATTGTTTCAACGAACGGTATTGGTCGCCGTGC  
GCTCCGGGAATGTTTATGA---CCTTCATTTGTTGG-----CATAAAAG  
GTAAAT-----TAGTCTACTTATAGGA--GGCAAAATTAGCACAGTCCCCCCC  
CCCCCCCCATCCCAACCTGGTCTTCAAAGTTCACGCAAACCTCTCGGCACAGTGTTCCAAA  
TA-----CCAGGATAATGTATTCAATTTGCTGCGTATT-TTCCTAAATGGCACA  
----AAGGTATTTTTCTAGTAGTCACTTTTATCCTTAAACCGAGTTTCTTAAATA-G--  
-TAATTAACCACGAGTAGTGTTCGGTGACAATGCGTACCTGTCCGGGGTTTTGTG---  
-----AATGCTTAACGTTTAAATTTATTGAAGAAAATAACTGTGT  
CA-----GATTGAAAAGGGGACACACACACACACACAAAAAAATCCAGTTTAG  
GTTTAAATGAAGAACGCTCAGTAGAGAAGCCACAGCTCTCTCGGTTGTACCTGGTGGAAAC  
TTTGAGCCCCGCTGTTCCCTCTAC-----CCCGTTGTGTTATTAGTTTTTTATTATTTT  
AGGAATACAGTATAAAGAATCTCTGGTAC-----CTTTTATCCCATTTCGCTT  
CCATGATGGAGTGTAACCATCAGATTTTTCATCAAAGTTCTATTAAGTGAACATAGGTTG  
CAGGGCA-CCTCTGATTGAAACAGTTTAAATTTTAATTGTGTTTTTAATTTGACATATAG  
TTGCAGAAAAGAATGACACTACA-CGCT----ACGGGGCGGTTCGATTTTCTTAATTCAT  
CCCTGAGGAATTGATGAGTCTATCAGTCCACTAGATTGGAAACCCATTAACG--CTCAAT  
GGTTTACGCGTCTTGGGTTGTTAATTGGAACCTTGATGGAT-----TGT-----  
----AGCCCTTTGA--TAGGCTATGCTGATCTAATCTCGATGAC-TTCTGTTTTCCAAT  
AAATTACACAATTCATTTTC-CAGCC-CCGATTACATAAATTGTACACCTCCAGG-----  
-----CTCC-----GTGG-----AATGGGGAGCCTT  
TTTGC-----AG-----  
-----CCTATTGCGAGGTGTCATTTG-----TACCAA-----GAACAGCAAG--CT  
TTTGAATGAAAATCGAAACATAATCAACGTTTATACTTAGAAAATTTATTGATATCATTT  
TCTTCGGTAATT-TCCTTATTCTAAAGTTC-GACGCGCCATACATCATAATACACCCGTG

TAAAAGGA-----C----TGTGTTTAATATTTATCGAAGCTTGATTTCGCAGATC  
AAACTTGTTTATGACTTCATCTGTACGGCAGG-TGGAGCCTTTAGAATATTATATAGGC  
AGTCGG-GAGGCTAT-----TTTCCAGCAGCATAAAC----CTACTAAAGATCAATTT  
TCATTAGGGAC--AACGCGAGTCTGACATATTCTATACTTTTTATTTGGGGGGGGGGGAG  
GGGGGAGGTGGAGGATTTTC---ATTTTCTGCGCTCTTGCAATCTGTGCTGAAGAGCATT  
ATGGACGTGGGGTCCAGTAAGCGGTGACCACAGCTCAGC---TGTGCATTGGGCAAAGA  
GATTTCGAAGCCAAGACACTG-----GA--GAACATTAGTGGGAGAGG-----  
--CGCCAGGTGAACAA----GTGCAGTGTATGTCTTACAACCGACCGTGTTTTGAGGACC  
AAGGATCTTGATGATGGT---GTGGTCTTTAGCTCTCTCTCTCTCTCTCTCTCGCTCG  
CTTCAAGCAGA-----TGC GCGCAGCTAACAGGGCTTTTAAATAGTT  
AAGCTTCGAAAACGTGCCCTATTTAATGTGTCACTGCGGATTTACG---CCATATCTT  
TATTAGCTCCAACTCCATTCAGACACAGTACCCCCGCTTTAGCTGCCGGCAGTCTATC  
A---CTTGGTAGAAATGCTCGCTTCTCTGAACGTGCAATGTGTCTCGCACATCTCCGTGT  
GTTAGTTGCATTTTTTAAA--AAATAAACTTTTTTA-----AAAGGAAAGC  
ACAAAAGAGGAAAAACGA-----CCCC  
CCCCCTCCCCACCCACCCCCAGG-CGCCCCACCCAGTCCCCATTTAA-----  
-----
