# Supplementary material
Source: PubMed Central journal article supplement (PMC10214386)
Supplement: NIHMS1890223-supplement-Sup5.pdf [file NIHMS1890223-supplement-Sup5.pdf]

>uHMXcne\_Xenopus

-----CCATTGC  
ATATTGTGCCAACACAA-----CTGACT  
CGAT-----  
-----AACACCGTTTCTGGTGCTGTG-----  
AGCAGCTA-----CACTCTGG  
AAATGACACAATTATCAAACACATTTTTGCCTGAAA---CAAGTAAACC-----  
-----AACTAGTGA  
TGCGCAGG-----TCTGACTCTAA-----CC---TGCCTGCTCCAAAC  
CCAACCCTGCAAT-----CCACCTCTATATATGGACCTGCATGA-CTTGC  
CCCATCTCTGATGT-CACAAAGGG-----GGCGG  
GGCAGGCA-----CACCTGTAAATAG  
AGGCTGCAGGAGCGGATAGCAAGGG-----GTAGTAGGGCA-----ACTCG  
CTCACAAACTGCA-AATCTTGTGCAAATCTCGGCCACATGTGTTTCAGGCCGGCGGGTTA  
TGAAAAAACATTTG-----GGTTTAAAATAAAAAGGGCACCTTTTGGGCTTTGTGC  
ATTG-----CACTTGC---AATTGGAAATGAACCCTCT-----  
-----AGTGT-----TGGATATAATATGAGACTTCTGTCTTTCACCCCATGCAAGTTGC  
CCCCTG-----ATCTTCCTTTCTGG-----GGGAGGG-----CTATAA  
GGGGGA---AGCAAGGCTGGAGGGACAGTGAAGTGAAGGAAAGAGGAGTGTGCGTCTTTAA  
TTCTCCCCCGGGAGCACATTAGTCTATCAATCTAATAAATTGGAAAGCTATTAGCAGGT  
CTGGTTTATGCGTTTCAAGCTGTTAACTAGAGTTTGTATGAATGGTTTTCTTTGATGGG  
ATATGGAGGCCTGATCTGACTGGGTTGGACGCTGCTATAAATTACAGCCTTGCTTCTCC-  
-----GAGAGATTCTC-----CCTACAGGCACTGGC-----  
TG---CTCCAGCACACTGCTCA-----CTCTCTTCTTTATGGG--CCTATTTAGCTCGA  
AA---GCTCCTCAACAATCCTGGCC-----  
-----TCCA-----AAAAATCGAAGCATAATCAAGGTGTA  
TGTTTGGAAAATTTATTGTTATAATTTTCCCTGCGTAATCTCC-TCCATTTTCCCGGCAG  
CTCCAACCTCATAGATCATCATCT-----AAAAGGGAAAATGAATAGCAGTTTA  
AAATTTATCGGTCTTTGATTCTCAATT-ATACGTGTTTATGGCTTCATCTGTCTTCAGTG  
GCTTCAACC-TTTTCCATTCCGGTGAATATTA---TTTGTACGAGATCCATTAAATTC  
ACAATCCAG--CCCTAATGGT-CGGCGCCAGCA-TTTGCAGAAGGAAA--TT---TTTT  
GAAAGGT--GGTTTGCAAAAAGCACAGATGTTATGACATTGGAAATTGCCTTATTGATGG  
-CTCCTCTCTCTGCTGCTCTCGG-TGCAATTTGTAACCTGGCCCATATCTATATCTTAGC  
-CTGACAGCTCAAGAATAGCCCTCCACACCCCTTCCACATATCA-TCCCGCTTGGTGA  
CACA-----AGGTGTTTAGACAGATGGACAATGCC-----  
-----CTGTCACTCCTGCTCAGCCCCCCCCGACATA  
CAGGGTAAAAA-----GGATTGTCAGGCAGGAAAAAGTTAAATATCAGTCTACCTGT  
TCTATCTA---TCTATCTATCTATATATATTTTAAATATAACCAATCTCTTCAAACCACTCC  
CTGGTTGCTGAGGTAAGTACTGAAATTCCAAATAAGAGTGAATAACTAAAAAACTAC  
AAATAATAAAAAAATTAAGTGTCTGTTTGTGTCTGTAAG-----  
--TTACCCTCCCATCTAGATTGTAACTCTATGGGGCAGGGACCTCCATCCTCTTGTGTC  
TACGACTCTTATCTTATTGCAACTATATCTTGTACAGGTATAGGACCTGTTATCCAGAAT  
-----GCTCGGGAACAAGGGTATTCCGG-----ATAAGGGGTCTTTCTGTAACCTT  
GGATCTTCATACCATATCAAATCAATAAAACATTAATTAAGTCAATAAGATTATTTT  
TATCCAGTAAAGATTAATTATATCTTAGTTGGGATCAATTACAGGTA---GTTTTAT  
TATTACAGAGAAAAGGGAATCATTAAACATTAATAAACCAATAGGGCTGTTCTGCTC  
CCAATAAGGGG-----TAATTATATCTTAGTTGGGATCAAGTA-----  
CAGGTAAGTTTATTATTACAGAGAA

>uHMXcne\_lamprey

-----GTGGG  
AGATCGAGGCGGAGGAAA-----AGGCCA  
TTAA-----GGGAGAGGAG-----  
-----AGGGGAGCGGTAGCGGCGGCGGG-----  
-----  
-----

-----AGGTTGTGG  
CGGGCGGGCGGGATGGCCGTGCAGGGAGGA-----GCGGGTAGCCGATAGCTG--  
-----CAGGAAGAG-----AGAGA  
G-----  
-----AGGGAGGCAGAG-----  
---TCCGACTGTG-----  
-----  
-----AGCGGGG-----AGAGGCAGGCGCCT-----CTGGTCGATG-----  
T-----TTCCCCTTCTCCGG-----CTGCAA  
GGCCCC--CGCCGTGCTCGGCTACAGAGCCGCCT-----  
-CCATCCATCGGGCACCAAACAGGC-----GCGGGGCCATTAGCTCCC  
GCGCGTTCCGCTTTACAGCCCGTTAATTGGAACCTGATTGATCGTTGCCCTTTGATAGG  
ATATGCTGACCTAATCTCGCCATGCTCCATTTTCCAATAAATTACACAATTCATTT-CCT  
ACATTTATTACACATATAAAAAAACCCACACACAGCCCTTAGGCGGTGCCGACGCGAGTA  
TG--CGTCCTATATAGTGCCCG-----CGCCTGTTTCTCAGCGGGTCCCTTGGCTATC  
AGAGGCGCT-CTGAGCCACGCTTGC-----  
-----GCTAGCGGTGAGCGAAAATCGAAATATAATCAACGGGAG  
TGCTCGGGAAATTTATCGTTATAATTTTCTCC-TGTAATCTTCGCCCATTTTCCAGGACG  
GGCCGTAACATATTTTCATAATAT-----ACGGCGAGACGGAATGGC-CTTTA  
ATATTTATTGGTCGTTGATTCTCAATTCAGGCTCGTATATGACTTCATTTGTCATCTCGG  
ACTTGAACCATTTTTCCTGAGCCCGGAGCACGGCAGCTTGGCTCGCGGCCGACCGCGGCC  
GCTA-----TTTCAGAGGCAACACTCTGTAA-TCATAATAGGGAAC---TGGAATTTT  
GAGAAGT--AATTTG-AAATTGCGAAGGAGTTGTGACACGTTAAATTGTGTTATCGATGG  
TGTGCTCCGGC-----AGCGATTTCT-----TTTTTTTTTC--  
-----TT-----CCTG-----GG  
CGCG-----  
-----CTCGC-----  
-----AGAGAGCCAGGGAAAG-----CTAA  
GGTAATGC-----AGCCT  
C-----  
-----  
-----  
-----  
-----  
-----  
-----  
-----  
-----  
-----  
-----  
-----

>uHMxcne\_Zebrafish

-----TTTGTATTCTCTCTTTCTCTTATTTAAAATCG  
CTTTTTTAGTACAATATA-----TTTATATATTGACAATATATACTA  
CCAT-----TAGTGCTC-----AT  
TTAAATTGAAATGCATAATTAATAGTGGA-----T  
GATAATAA-----TAAAATTAATAATGCTGAAGTATTTAAGC---CTGCAAC  
TGAAGACATGA-CAGTGAAATTAAGCTCCTATAAA---TGA-----  
-----GCCGTTTTAATTACTG-----  
-----TACTCAGTTTGTT-----TGATTAATCCAGCC  
CATTGCGTCGTGT-CTCTCTG---TTTCCTCTAGTCAGGAAAGGTCGGTTGCT-ATGGC  
CACATTTATATGTGTTTATAAGT-----GGCTC-----TGAGT  
GACTGCTCACCATCTCGGC-----TCCAAACAACGAG  
CAATAATCAGCTCATT-----AAAGAGCTC-----  
----CCCCTTGCATCATAACCCCTG-----TGCTC-----AT  
CTAAATAAC-----AAATAACTCTCCCTCCGTCCTGCCTTTT



TG---C-TCAGAGGCAAAGAGCA---AGGATCCTA-TTTATGGT--GTCATTTAGCCAGC  
AA----GCA-GCCAACAATCCTGG-----  
-----GA-----AAAAATCGAAGCATAATCAAGGTGTA  
TGTTTGGAAAATTTATTGTTATAATTTTCCAC-AGTAATCTTC-TCCATTTTCAAAGCAC  
CCCAGCGACATATATCATAATAT-----AAAACAGAAAATGAATAGC-GTTTA  
AAATTTATCGGTCTTTGATTCTCAATT-ATATGTGTTTATGACTTCATCTGTCTTCAGTG  
ACTTCAACC-TTTTCCATTATTGTAGAATATTA----TTTGTACGGTATCCATTAAATTC  
ACAATCCTG--CAGTAATGGC-ACACTATAGCG-TTT-GGGAAAGGAA---T----TTTT  
GAAAGG---GGCTTGAAGAAAGCGAAGCTGTTATGACACTAGAAATTGCTTTATTGATAG  
CCTTGCCTCTCGCTGCACATTT-GGCAATTTGTAACCTTCCCCATATCTATATTTTCCAGC  
-GTGACA--CTGATAAGAACCTTTCTGTCCCC--TACCAGATTACA-GTTTG--TAATGA  
CACA----CAACGTTTTTCAGAAGCCAG-----TCTAGGACCCCATTTGAGCATTCTACAAA  
CATGCTAAA--CCGGTTAAAAGATCAA--CATCATTTTTCATCTACCGCCACTATGTCATG  
CATTACCTGAA----CTGTTATTAAATTGTACATGTATAATTGCCACTG-----CTGA  
TCTACCAGGACCTTATGTGCATGTATTTAAA-----CTTT-----AGTCC  
CATGGCAGTGATAGACCTATAAATATGTATATTACTAGATTACTTGCACGATG-----  
CAGTGTACAGGATTGAGGGGCAGATTATAAATTTAGGACCGAGTGAATAAAGGTCGCTT  
CTGTGATCATCCTGATA-TCCCAAACCACTGCGGGTGTAGT-----TT-----  
-----ATATA-----TAATAACAAGATAATAA-----  
-----TCCTTGCATTTGATTTAGT--GC-----TTATCACGTCTTTGAG----AC  
GTCTCAAAGCACTTTTCACAGGATATATTGCAAAGTGTAGTGACTGTGTGTTTTGGGGGCC  
AAAACAC-----GGCTGCCAATGGTGTATAAAGACTCTTTATGTTTTAAATGGAGCACGA  
TTTTGTTTGTGCATAAAAATTAACATTCTGCCTGGAAAAACAAACAAAGCTATTTTGCCT  
GTTAGTTCAAGCAGGAGAGGCGGTTAACTTTAATGCTTCTTCTTTCAGTGAACACGACGT  
GAGTGTACTGTTTGAATTGGTATGTGA

>uHMXcne\_chicken

-----GTTCTCTG-----  
--CCATGAGCTGAGTAAAGACGTTGCTGTAACAAAGCCTATTTCTTTGTAG--ATGCCG  
TAAA-----AGAAATCCTG-----CTGTTTGTGTGCGTTGTGGCAGAAG  
TCCATTGGCGTG--GTTTTTCAGCAAGGAAGGAAAACCTCAGTGCAGGTATTGCCGTCTCA  
GATAATTGTGTCTATCTGTCTAGCCACGGGCAGCCTCACCTCCCTGGACGGTGATCCTGC  
AGCCACTTCTG-CTTCGCATCAGTGGGCTCTGGAG---GGACAAGGGGGCTCTGAGGGC  
CCCAAATCCAGCACAG-----AGACAGGTG  
TGAGCAGAGGGAG---CTCCCTGC-----TGAGATCCTCAGCC  
TTC-CCACATTGTA CTGGTG-----CTGCCAGCCTGAAGGAG-----CA-CTG--  
-AAGGTTAG-----TGAGAAGAGCCTC-----G-CTG-----CGAGG  
C-CTTTCCCCTTGAGCATGTGGCTGCAT-----CTCCTTCGC--AG  
CACCCAGCCCCTCAGCCACGACACA-----  
---TCCGGCTGCACCGCTCCTCCCGCC---GGCTC---GTTTCTCTGCTTGAAAATCC  
CTGGATAACCTGTT-----ATTTAAATGAA-----CCTCTCACACGTTGGCT  
A-TGGTTACT--TACTTTT-----CTCAATGACGAATCTTAA-----  
-----AACGGAT--TGTCTGTAAAA--GATCATCTGTACCTTA-TCGGTG-----  
TCCCAATCCTCTACCCTCCCTTCCCCCGCCCCAAA---ACAAAAC-----CTGTCA  
GAGGTG--CACCACGTGTGTGAAACTAGTCGATT-----TCCTTAA  
TTCATCCCTTGAGAATGGATAAGTCTATCAATCTATTAAATTGGAAAGCCATTAGGAGGC  
CTGGTTTATGCGTTTCAAGCTGTTAACTAGAAGTTGATTGATTGTTGTTTCTTTGATAGG  
ATATGCTGATCTAATCTCACTGTGCTCCAGTTTGCAATAAATTACACAATTCATTT-CCT  
CCATTT-----AGAAAGAGAAAATCACA-----CCTCCAGGC-ATGCC-----  
TG---CTTCAGAGGCAAAGAGCA---AGAAGCCTATTTTATGGT--GCCATTTAGCCTGC  
AA----GCT-TTCAGCAATCCTAGCC-----  
-----TCCA-----AAAAATCGAAGCATAATCAAGGTGTA  
TGTTTGGAAAATTTATTGTTATAATTTTCCCAAGTAATCTCC-TCCATTTTCCAGGGGC  
CCAAAAGACATAGATCATCATCT-----AAAAGAGAAAATGAATAGCAGTTTA  
AAATTTATCGGTCTTTGATTCTCAATT-ATACGTGTTTATGACTTCATCTGTCTTCAGTG  
ACTTCAACC-TTTTCCATTATTGGTGGAAATATTA----TTTGTACGGGATCCATTAAATTC  
ACAATCCAG--CCCTAATGGT-AGGCTGTAGCG-TTTCAGAAAGAAA---T----TTTT

GAAAGGT--GTTTTGCAGAAAGCGAAGCTGTTATGACACTAGAAATTGCTTTATTGATAG  
CCTCGCCTCTCGCTGCACATTT-TGCAATTTGTAACCTGGCCCATATCTATATTTTCAGG  
-CTGACA--CCAAGAAGAACCTCGCTGTCCCCACACCAGATTACA-CCGTG--TAATGA  
CACG----GCA---GCGCGGCGGTGAGGGG--CCG-----CCCGGCCGCTCCTCCGGGG  
CAGGCCGCGGGCCGGGCGAGGGGCCAGCTGCTCCGGCCTGCAGGCTGCCTT-----  
CGCCAGAGGGAGCTCCAGGAGAGACTCAGGGGAAGACGGCGGGGGCCCTGAGGCTGCCTGC  
GGGCTCCT--CCCCACCGCCCCGGGGCTGAG-----GCACCCTTG-----GGCC  
GCAGCATGGGCTGGGCTGA-----GGGC--TGGTGGCTGGTGTGGCCTACA-----  
-AGCGATGCCCAACTGAAAGCC-----AGCCTCG  
CTCTCCCCAGCAGCA-----AAACCCCTGAGAGGAACGGGAGCAGGTTCCCG-----  
-----CTAAGAGCACTGTAGAAAAGATAGCAA-----  
-----AGCTTAGAATGAAAAAGTGCCT-----TGAAATACTGCTGCTG-----A  
GTATCA-----GCAAAGGGCTCACCAGGGAGATGCCGGTGTGTG-----C  
ATCCCT-----GTTGGCAAGGTTTG-----TCCC-----CTCACAG  
-----GTGAG-TAACTGCCACGGTGGGCAATCCTGTTCCTCCTGTGCTGCTT  
-----GGC----TGGGCTGA-----AGAA-----  
GCAAACCCGTAG-----

>uHMXcne\_Chrysemys

TTATATCTCCGCTGTATGCCTCTGTTTCCATGTTACACTTTGTCCATCTTGTCAATTTA  
GTTTGTAAACTATACAGGGCAGGGCCTTTCTCTTACCAGGTGTTTGTACGGTGCATAGCA  
CGAT-----GGGGCCTCTT---GGTGCTA--CTATACTAAAAATAATGTCGGAGAGG  
TTGCTCGGTGGA--ATTTGCAAGGGGGA-----A  
GACAAGTT-----AAGAACACTGGGGTAGA-ACTCCT-----  
----AACACTG-AATTGCGTTTGGTCAGAGTGGAGA---AGA-----  
-----CAGCTTTAACAA-----AGGCAG---  
-----GGTAGCAGTGACCCCAACAATGA-----AT-AATGGTGTCTTCAGCC  
TTAGTCAAAATGT-CCCAGTG-----CTTCCAACCTTTAGTGAGTATTGGTTA-CTA--  
-AAAGTTACT-----TGCAAAGAAATAAA-----AGTTT-----TGAAG  
G-CTGCCCATTTAAACTGCAGTCTGCCCCCTCCTTTTTCTCTCCCTCCTTTAACACA  
CACACACAGGCT-----TAGA-----AAGGGAGGCAAAGAGTCAGTCTCATTTT  
ATATCTGGCTGCACCAGTCCCTTTAA-----TGTTT-----GCAAGTCC  
CTGGATAACGTGTT-----ATTTAAATGAA-----CCTATTGCACGTATGCT  
A-TGGTTACT--TACTTTT-----CTCAATGACGAATCTTAA-----  
-----AACGGAT--TGTCTGTAAAA--GATCATCTGTACTTTA-CCAGTG-----  
TCCCAG-----TTCTTTCCCCCTCCAAAAAAAAAAAAAAAAAAC-----CTGTCA  
AAGGTG--CACCACGTGTGTGAAACTAGTCGATT-----TCCTTAA  
TTCATCCCTTGAGAATGGATAAGTCTATCAATCTATTAATTGGAAAGCCATTAGGAGGC  
CTGGTTTATGCGTTTCAAGCTGTTAACTAGAAGTTGATTGATTGTTGTTTCTTTGATAGG  
ATATGCTGATCTAATCTCACTGTGCTCCAGTTTGCAATAAATTACACAATTCATTT-CCT  
CCATTT-----AGAAAGAGAAAATCACA-----CCTCCAGGC-ATGCC-----  
TG---CTTCAGAGGCAAAGAGCA--AGAAGCCTATTTTATGGT--GCCATTTAGCCTGC  
AA----GCT-TTCAGCAATCCTAGCC-----  
-----TCCA-----AAAAATCGAAGCATAATCAAGGTGTA  
TGTTTGGAAAATTTATTGTTATAATTTTCCCAAGTAATCTCC-TCCATTTTCCAGGGGC  
CCCAAAGACATAGATCATCATCT-----AAAAGAGAAAATGAATAGCAGTTTA  
AAATTTATCGGTCTTTGATTCTCAATT-ATACGTGTTTATGACTTCATCTGTCTTCAGTG  
ACTTCAACC-TTTTCCATTATGGTGGAAATATTA---TTTGTACGGGATCCATTAAATTC  
ACAATCCAG--CCCTAATGGT-AGTCTGTAGCG-TTTCCAGAAGAAAA---T---TTTT  
GAAAGGT--GTTTTGCAGAAAGCGAAGCTGTTATGACACTAGAAATTGCTTTATTGATAG  
CCTCTCCTCTCGCTGCACATTT-TGCAATTTGTAACCTGGCCCATATCTATATTTTCAGG  
-CTGACA--CTGATAAGAACCTTTCTGTCCCCATACCAGATTACA-CTTTG--TAATGA  
CATG----GAGAATGCA--GCGGTGAGGGG-CTGAGA--GCAAGTCACCTCCCTT----  
-----CA-----CATCCTCCTC-----CTCCTCT-----  
CATCAGAGGCA-----AGTTAAACAAGGGAAATGAGTTGGGGGCTG-----CTGG  
AGTCTCAT--CCTTTTCTCCTGTAGTAAGGGGCTGATAGCAGCCTTC-----ACTCT  
CCATA-----TCACCCTCA-----TCCCCTCAACAGAGCAAGTTAAACAGG-----

-G-TAAGATGAAATGAGAGACTG-----CTG-----CTGGAGTCCCA  
TCCTCTCCCCTTCCATG-----CTCAGGCCAAAGGGG-----  
-----TGGA-----TGGGAAATAACAGTGGGAATCAGTCTG  
TCTGTGAGCAAGCAGGAGGTG--CATAATT-----CCCATGCTCCAGGGAGAG  
GCTTCATAATTCACAGACAGAA-----AGAAGCAGCTTTCTG-----G  
AACACT-----GTTACCAGCTGTGA--TGATCTTTC-----GCTAGGG  
-----GGAGCTAGAAGCTACCT-TGTTGCCAGACAGGTTTTGGTAAGAGAGACAGATT  
-----AGGTTGCATATTAA-----TTAAGA-----  
GAAGGTAGT-----

>uHMXcne\_Human

-----  
----AGAAGCTGGACAAG-----ATGACG  
CTAA-----GGTACGACTA-----TCAGGTTCTATTCTATGAA-GGCGTCAAAGCTT  
ATCCTCAGGGATCCATTTCTAGTGGTGAG-----CTTTCA  
GACAATGA-----GTGGGCTGATATTTCTCAGCAAGTCACCTCC  
AGGAAACTGAAAGCCTACATGTAGGTGACAGAGGCTCAACCTACACCCCATGTCCCA  
ACCTCATTAAGCACAGCCTCAACAACAACATGCTTTTCTGCAGGAAGATGTAGGTGGAAG  
CGTACAGGGAGCCTT--TTCCCAGCTTGAAGCACCCTGGGGCAAAGGAGCTGTTTCATCT  
TCCACCAGGGT---CTGAGTGGAAAGGGTCCCCTGAATACAACAGCCTTTCTTCT-CTG--  
-AAGGTTATC-----TGCTAAGCACCA-----AACTT-----TGAGA  
G-CTGCCAGCCATGACTG-----CCCCAGCGA-GGG  
CAGACACAGGCCCAACCGCGATGGA-----AAGGGAGGC-----CGAGTTCTATTTT  
ATCTCTGGCTGCGTCAGCCCCTTTAAA---TGTCTCAATTCCCCTACTTGGAAAGTCC  
CTGGATAACACGTT-----ATTTAAATGAA-----CCTATTCCACATCTTCC  
A-TGGTTACT--TACTTTT-----CTCAATGACGAATCTTAA-----  
-----AACGGAT--TGTCTGTAAAA--GATCATCTGTACTTTA-CCAATA-----  
TCCAGG-----CTCCCCCTCCC-----AAAAAA-----CTGTCA  
GAGGTA--CACCACGTGTGTGAAACTAGTCGATT-----TCCTTAA  
TTCATCCCTGGAGAATGGATAAGTCTATCAATCTATTAATTTGGAAAGCCATTAGGAGGC  
CTGGTTTATGCGTTTCAAGCTGTTAACTAGAAGTTGATTGATTGTTGTTCTCTGATAGG  
ATATGCTGATCTAATCTCACTGTGCTCCAGTTTGCAATAAATTACACAATTCATTT-CCT  
CCATTT-----AGAGAGAGAAAATCACA-----CCTCCAGGC-ATGCC-----  
TG---CTTCAGAGGCAAAGAGCA---GGAAGCCTATTTTATGGT--GCCATTTAGCCTGC  
AA---GCT-TTCAGCAATCCTTGCC-----  
-----TCCA-----AAAAATCGAAGCATAATCAAGGTGTA  
TGTTTGGAAAATTTATTGTTATAATTTTCCCCAAGTAATCTCC-TCCATTTTCCAGGCGC  
TCCAACGGCATAAGTCATCATCT-----AAAAGAGAAAATGAATAGCAGTTTA  
AAATTTATCGGTCTTTGATTCTCAATT-ATACGTGTTTATGACTTCATCTGTCTTCAGTG  
ACTTCAACC-TTTTCCATTATGGTGGAAATATTA---TTTGTACGGGATCCATTAAATTC  
ACAATCCAG--CCCTAATGGT-AGGCTGTAGCG-TTCCAGAAGAAAA--T---TTTT  
GAAAGGT--GGTTTGCAGAAAGCGAAGCTGTTATGACACTAGAAATTGCTTTATTGATAG  
CCTCGCCTCTCGCCTGAACATTT-TGCAATTTGTAACCTGGCCCATATCTATATTTTCCAGG  
-CTGACG--TTGATAAGAACCCTTCTGCCCCCCACACCAGATTACA-CTTTG--TAATGA  
CATG---GAGAATGCAGGGTGGGGAGGGGACCGAGAAGGGCAGCCACCTTCTTC----  
-----CTCCTCCCTGTCCCCAGCTGTCTCCTC-----CTCCTCT-----  
--CCATTGAGA-----AGGAAGATGGTGGAAAGGGGATTGTGTCTTG-----CTGT  
GCTCCTGG--TCTTT-----GCTGGCCTT-----GATCC  
CCATGATGCCTCAGGCTCA-----GCCTCTCCATGA--ATGTCGACCAGG-----  
-GAGTCTCTTGTAAATGGAGGTCTC-----TTGGGCCCGACCCTGTCCAGCACCCGA  
CCCTGTCCAGCACCATGGTCCTGAACCTCTGACACGGGGAGAGCCTGGGCCTTTTCTGG-  
-----TGGAGTGGAAAGAATTG-----  
-----AGCTAGAGATG--TCCAGTAGGC-----TGGACACTTCTCTCTG-----G  
ATCTGATCTTTTGGTGACAGAATACTTTGGGGAGAAGCAAGTTCAAG-----T  
TAAATTC-----AGGCTTAAGCCCAATCTTGGCCTCTC-----CTCACAC  
ACATGCAGACTCAATGTGCTCCCTGCCTTCCCTGGCAACTTGTTCTTTGAGGGGAA----  
-----AGATCCAATCTTA-----GAAA-----

GAATCTCCC-----  
>uHMXcne\_mouse  
-GAGATAATGAGCCCAGATCTCTGGAAATGTGTATGCACAGACCACATGCTTCCCTCCAA  
ACCCAGAAGTTGAATGAG-----AAAACC  
CCAA-----GGTGCCGCTCTTCAGGTTTTAGCCCCTCCGAGAGA-AGTCTTGAAACTT  
TCAATCTTGAAACCATCTCTAGCAGTGAG-----CACTTA  
GCCAATTG-----ACTGCCAGCGTGGCTGACATTTCTCAGCAAGGTTCCCTGC  
TGGTGACACTC-----AGGACTCATCTGCAGG---TAACTCGATCTGTCC-----  
-----CAGCCTTAGCCACAGACGGTCTGT-----GAGGCTAAAG  
CGTTCAGAAAGCA--GCCCTTCAGCTCAAA-----AC---TGAGTGAGTCAGCT  
TGTGCCAGGGCTT-TGGTGTACCCCTGTACCTAGGCACAGTGGCCCTTCTTCC-CTG--  
-AAGGCTGTC-----TATCAAATACCC-----AACTT-----TGAGA  
G-ATGCCAGTCAGTACTT-----CACCTCGAGAAG  
GAGGCATCAGCCCGACCTCTATGCA-----AAGGGAGGC-----TGGGTTTCATTTT  
CTCCCAGCTGCGTCAGCCCCTTTAA-----TGTCTCAATTCTCCACCTCGAAAGTCC  
CTGGATAACGTGCT-----ATTTAAATGAA-----CCTATTGCACGTCTTCC  
A-TGGTTACT--TACTTTT-----CTCAATGACGAATCTTAA-----  
-----AACGGAT--TGTCTGTAAAA--GATCATCTGTACTTTA-CCAATA-----  
TCCAGG-----CTCCCCCTCCC-----AAAAAA-----CTGTCA  
GAGGTA--CACCACGTGTGTGAAACTAGTCAATT-----TCCTTAA  
TTCATCCCAGGAGAATGGATAAGTCTATCAATCTATTAATTGGAAAGCCATTAGGAGGC  
CTGGTTTATGCGTTTCAAGCTGTTAAGTGAAGTTGATTGATTGTTGTTCTCTGATAGG  
ATATGCTGATCTAATCTCACTGTGCTCCAGTTTGCAATAAATTACACAATTCATTT-CCT  
CCATTT-----AGAGAGAGAAAATCACA-----CCTCCAGGC-CTGCC-----  
TG---CTTCAGAGGCAAAGAGCA---GGAAGCCTGTTTTATGGT--GCCATTTAGGCTGC  
AA---GCT-TTCAGCAATCCTTGCC-----  
-----TCCA-----AAAAATCGAAGCATAATCAAGGTGTA  
TGTTTGGAAAATTTATTGTTATAATTTTCCCCAAGTAATCTCC-TCCATTTTCCAGGCGC  
GCCGACGACATAGATCATCATCG-----AAAAGAGAAAATGAATAGCGGTTTA  
AAATTTATCGGTCTTTGATTCTCAATT-ATACGTGTTTATGACTTCATCTGTCTTCAGTG  
ACTTCAACC-TTTTCCATTATGGTGGAAATATTA----TTTGTACGGGATCCATTAAATTC  
ACAATCCAG--CCCTAATGGT-AGGCTGTAGCG-TTTCCAGAAGAAA---T----TTTT  
GAAAGGT--GGTTTGCAGAAAGCGAAGCTGTTATGACACTAGAAATTGCTTTATTGATAG  
CCTCGCCTCGCGCTGCACATTT-TGCAATTTGTAACCTGGCCCATATCTATATTTTCCAGG  
-CTGACG--TTGATAAGAACCCTTCTGCCCCCCACACCAGATTACA-CTTTG--TAATGA  
CATG----GAGAATGTAGGGGGAGGAGGGGG-CTGAGAAGGGCAGCCACCTCTTCC----  
-----TTTGTCTGTCCCAGCTGTCTCTCTC-----CTCCTC-----  
----GGGGGAA-----AGGAAGATGGTGGAAAGGAG-----TTGCATC---CTGC  
CCTACATTGGCCTTG-----GATGCTCTT-----GGCTT  
CTA-----TTACGTCTCCAG-----  
-GGAAATGCCACCATGGATTCTCCTTCATATCTTG-----CTTGGGTCAAG  
CCCTGTCTGGCACTATGGTCTGATCCACTGCCAAGGAGG-----  
-----TAGA-----TGATGCGGAGAAAGCTG-----  
-----ATCCAGAGATG--AACAGTTGGC-----TTGACTCTTCCCTCAG-----  
----CACCTTACAGTAACAGAAGATATTTTGAAGAACCAGGAGTTTAAG-----C  
TACATTC-----AGTCATTAGCCCTGGCCTTAGTCTCTT-----  
ATTTTATGGTCCAGGGAGCTCACTACCTTACCTAGAAATCCATTCTTCAAGGGACA  
GTTGAGAAGAGTTTCTAAGGC----AAGTCCAAATCTACCACATGCTGAGAA-----  
GATTCCTCCTTT-----
