# Supplementary material
Source: PubMed Central journal article supplement (PMC10214386)
Supplement: NIHMS1890223-supplement-Sup6.pdf [file NIHMS1890223-supplement-Sup6.pdf]

1  
2  
3  
4  
5  
6  
7

**Supplementary File 6.** Transcription factors (TFs) predicted to bind vertebrate uCNE or dCNE and *Ciona* CNE (ciCNE). Total TFs predicted to bind each element are shown in brackets for each element in 9A. Counts for different TF subsets are shown in part B.

Figure S10 A

| Transcription Factor | dCNE (59TFs) | uCNE (40 TFs) | <i>ciona</i> CNE (60 TFs) |
|----------------------|--------------|---------------|---------------------------|
| Arid3a               | ✓            | ✓             | ✓                         |
| FOXD1                | ✓            | ✓             | ✓                         |
| FOXG1                | ✓            | ✓             | ✓                         |
| FOXI1                | ✓            | ✓             | ✓                         |
| Foxj2                | ✓            | ✓             | ✓                         |
| FOXL1                | ✓            | ✓             | ✓                         |
| FOXN3                | ✓            | ✓             | ✓                         |
| FOXO3                | ✓            | ✓             | ✓                         |
| FOXO4                | ✓            | ✓             | ✓                         |
| FOXO6                | ✓            | ✓             | ✓                         |
| LBX1                 | ✓            | ✓             | ✓                         |
| LMX1A                | ✓            | ✓             | ✓                         |
| Nr2e3                | ✓            | ✓             | ✓                         |
| PAX3                 | ✓            | ✓             | ✓                         |
| PAX7                 | ✓            | ✓             | ✓                         |
| Sox5                 | ✓            | ✓             | ✓                         |
| ATF3                 | ✓            | ✓             |                           |
| CEBPG                | ✓            | ✓             |                           |
| Creb5                | ✓            | ✓             |                           |
| Dux                  | ✓            | ✓             |                           |
| FOSB::JUN            | ✓            | ✓             |                           |
| FOSB::JUNB(var.2)    | ✓            | ✓             |                           |
| FOSL2::JUN(var.2)    | ✓            | ✓             |                           |
| JDP2(var.2)          | ✓            | ✓             |                           |
| JUNB(var.2)          | ✓            | ✓             |                           |
| MEIS1                | ✓            | ✓             |                           |
| NFATC2               | ✓            | ✓             |                           |
| <b>Dlx2</b>          | <b>✓</b>     |               | <b>✓</b>                  |
| <b>DLX5</b>          | <b>✓</b>     |               | <b>✓</b>                  |

|           |   |   |   |
|-----------|---|---|---|
| DRGX      | ✓ |   | ✓ |
| EN1       | ✓ |   | ✓ |
| HOXC9     | ✓ |   | ✓ |
| ISX       | ✓ |   | ✓ |
| LHX5      | ✓ |   | ✓ |
| LHX9      | ✓ |   | ✓ |
| MSX2      | ✓ |   | ✓ |
| Msx3      | ✓ |   | ✓ |
| OLIG1     | ✓ |   | ✓ |
| PROP1     | ✓ |   | ✓ |
| PRRX1     | ✓ |   | ✓ |
| PRRX2     | ✓ |   | ✓ |
| Shox2     | ✓ |   | ✓ |
| TLX2      | ✓ |   | ✓ |
| BARX1     | ✓ |   |   |
| BSX       | ✓ |   |   |
| DLX6      | ✓ |   |   |
| DUX4      | ✓ |   |   |
| ESRRB     | ✓ |   |   |
| Esrrg     | ✓ |   |   |
| FOXP3     | ✓ |   |   |
| IRF6      | ✓ |   |   |
| JDP2      | ✓ |   |   |
| LIN54     | ✓ |   |   |
| MEF2B     | ✓ |   |   |
| MEF2D     | ✓ |   |   |
| MSX1      | ✓ |   |   |
| Nobox     | ✓ |   |   |
| PAX4      | ✓ |   |   |
| SHOX      | ✓ |   |   |
| Ahr::Arnt |   | ✓ | ✓ |
| HOXD3     |   | ✓ | ✓ |
| TBX15     |   | ✓ | ✓ |
| CEBPB     |   | ✓ |   |
| HOXB8     |   | ✓ |   |
| HOXD8     |   | ✓ |   |

|                |   |   |
|----------------|---|---|
| PBX1           | ✓ |   |
| PITX1          | ✓ |   |
| PITX2          | ✓ |   |
| TBX1           | ✓ |   |
| TBX21          | ✓ |   |
| TBX4           | ✓ |   |
| ZNF652         | ✓ |   |
| Bhlha15        |   | ✓ |
| BHLHE22        |   | ✓ |
| CUX1           |   | ✓ |
| CUX2           |   | ✓ |
| EMX1           |   | ✓ |
| GATA3          |   | ✓ |
| HOXA13         |   | ✓ |
| HOXA2          |   | ✓ |
| HOXB4          |   | ✓ |
| HOXB5          |   | ✓ |
| HOXB9          |   | ✓ |
| HOXC12         |   | ✓ |
| HOXC13         |   | ✓ |
| HOXD4          |   | ✓ |
| Lhx4           |   | ✓ |
| LMX1B          |   | ✓ |
| <b>NEUROG1</b> |   | ✓ |
| <b>NEUROG2</b> |   | ✓ |
| NKX6-1         |   | ✓ |
| Nr2e1          |   | ✓ |
| OLIG2          |   | ✓ |
| PDX1           |   | ✓ |
| POU3F4         |   | ✓ |
| VSX1           |   | ✓ |
| VSX2           |   | ✓ |

8  
9  
10

Figure S10.B

**TF Subset**

**Count**

---

|                                 |           |
|---------------------------------|-----------|
| dCNE-uCNE shared                | 27        |
| ciCNE - dCNE shared             | 32        |
| ciCNE - uCNE shared             | 19        |
| <hr/>                           |           |
| only in dCNE & uCNE             | 11        |
| <b>only in dCNE &amp; ciCNE</b> | <b>16</b> |
| only in uCNE & ciCNE            | 3         |
| <hr/>                           |           |
| only in dCNE                    | 16        |
| only in uCNE                    | 10        |
| only in ciCNE                   | 25        |
